# Supplementary material for: Access to thiazoline and spiro[indoline-3,3′-thiophene] scaffolds via a formal [3 + 2] annulation reaction of crotonate-derived sulfur ylides and β-ketothioamides
Source: Royal Society of Chemistry journal article supplement (doi:10.1039/d3ob00087g), 2023-01-01
Supplement: d3ob00087g1.pdf [file d3ob00087g1.pdf]

## Supporting Information

For

### **A formal [3+2] Annulation Reaction of Crotonate-derived Sulfur Ylides and $\beta$ -Ketothioamides: Access to Thiazoline and Spiro[indoline-3,3'-thiophen] Scaffolds**

Jing Zheng<sup>a\*</sup>, Hong Gu<sup>a</sup>, Qinfang Chen<sup>a</sup>, Weiran Yang<sup>a\*</sup>

<sup>a</sup>*School of Chemistry and Chemical Engineering, Nanchang University,  
999 XueFu Road, Nanchang, 330031, China.*

\*Corresponding Authors

*E-mail: \*zhengjing@ncu.edu.cn; wyang16@ncu.edu.cn*

### **Contents**

|                                                         |         |
|---------------------------------------------------------|---------|
| 1. Copies of NMR Spectra                                | S1-S42  |
| 2. X-ray crystal structure of <b>3aa</b> and <b>7aa</b> | S43-S46 |

# 1. NMR Spectra

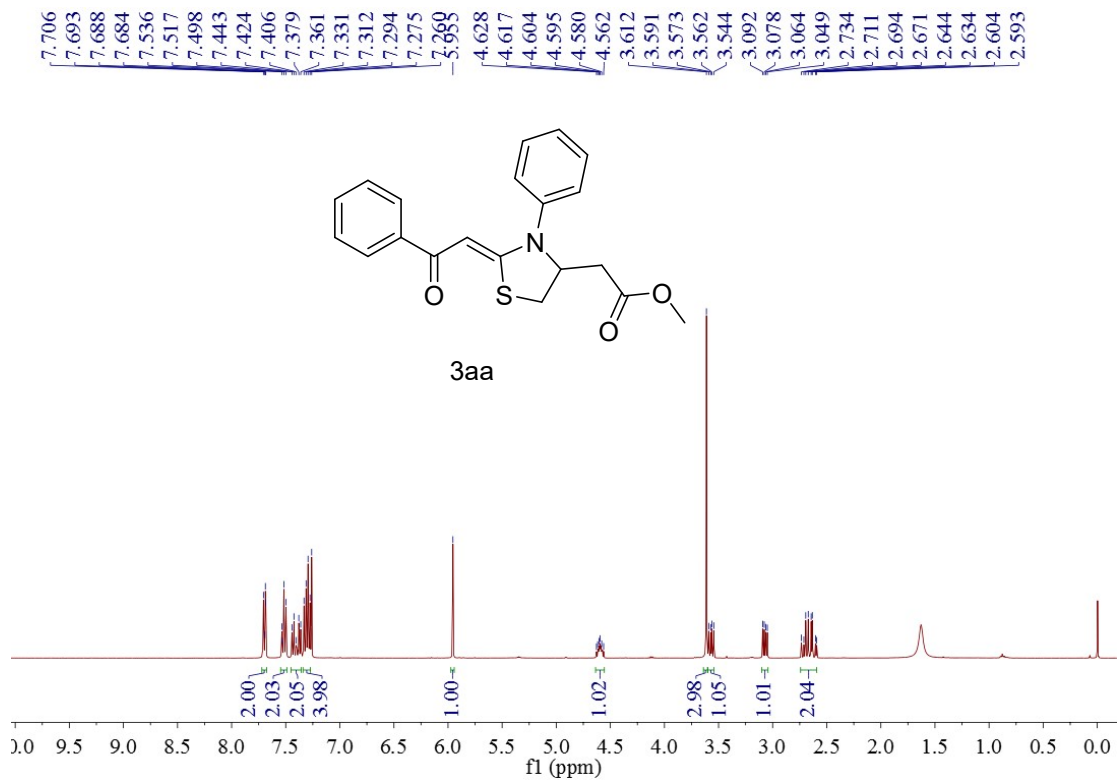

Figure S1. **3aa** ( $^1\text{H}$  NMR, 400 MHz,  $\text{CDCl}_3$ )

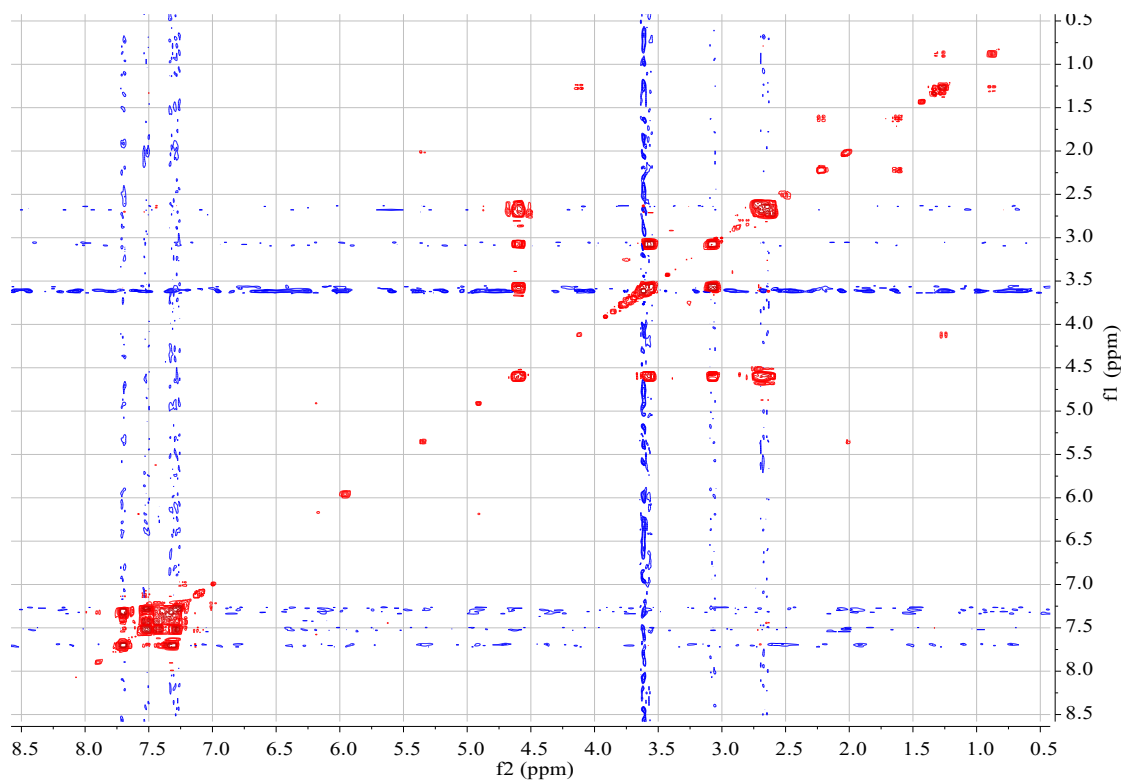

Figure S2. **3aa** ( $^1\text{H}$  NMR, COSY, 400 MHz,  $\text{CDCl}_3$ )

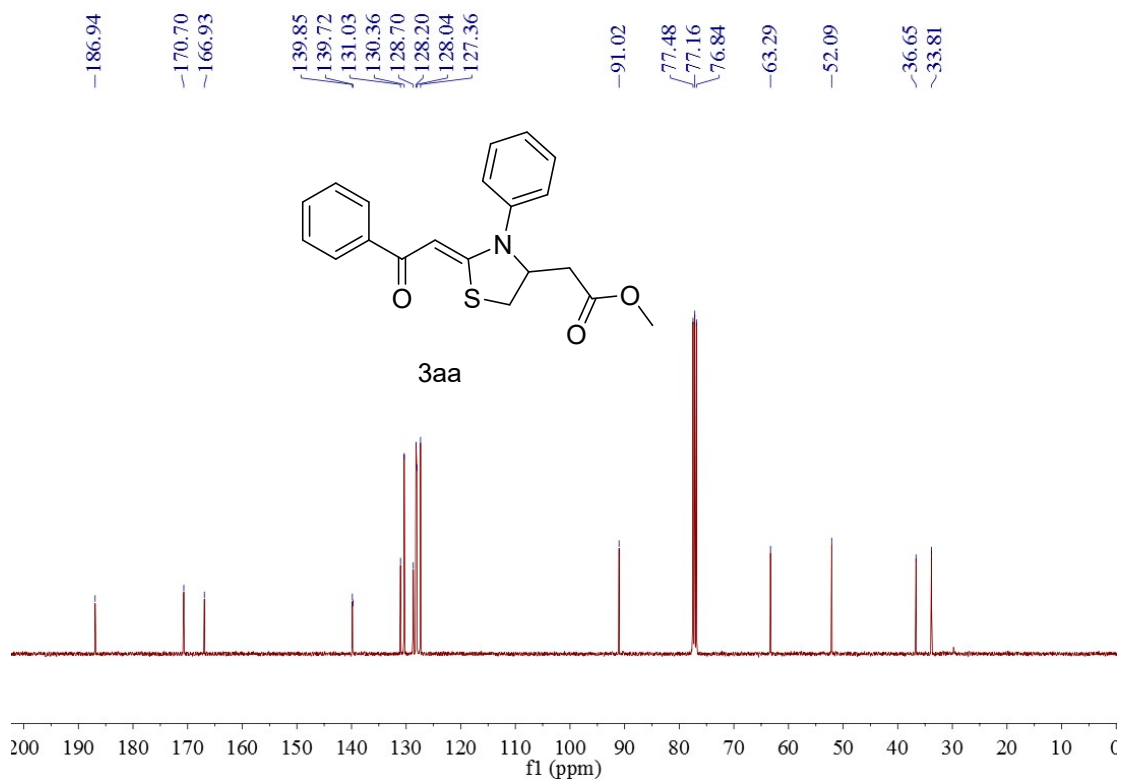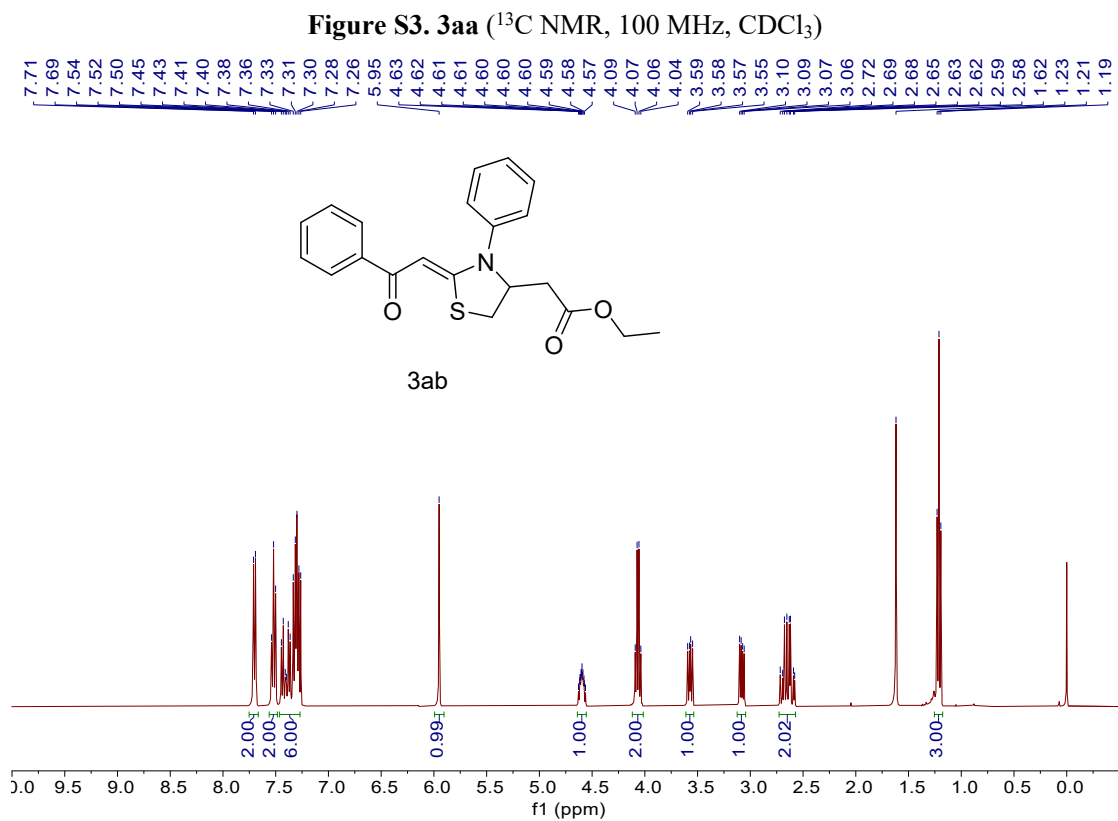

**Figure S4. 3ab** ( $^1\text{H}$  NMR, 400 MHz,  $\text{CDCl}_3$ )

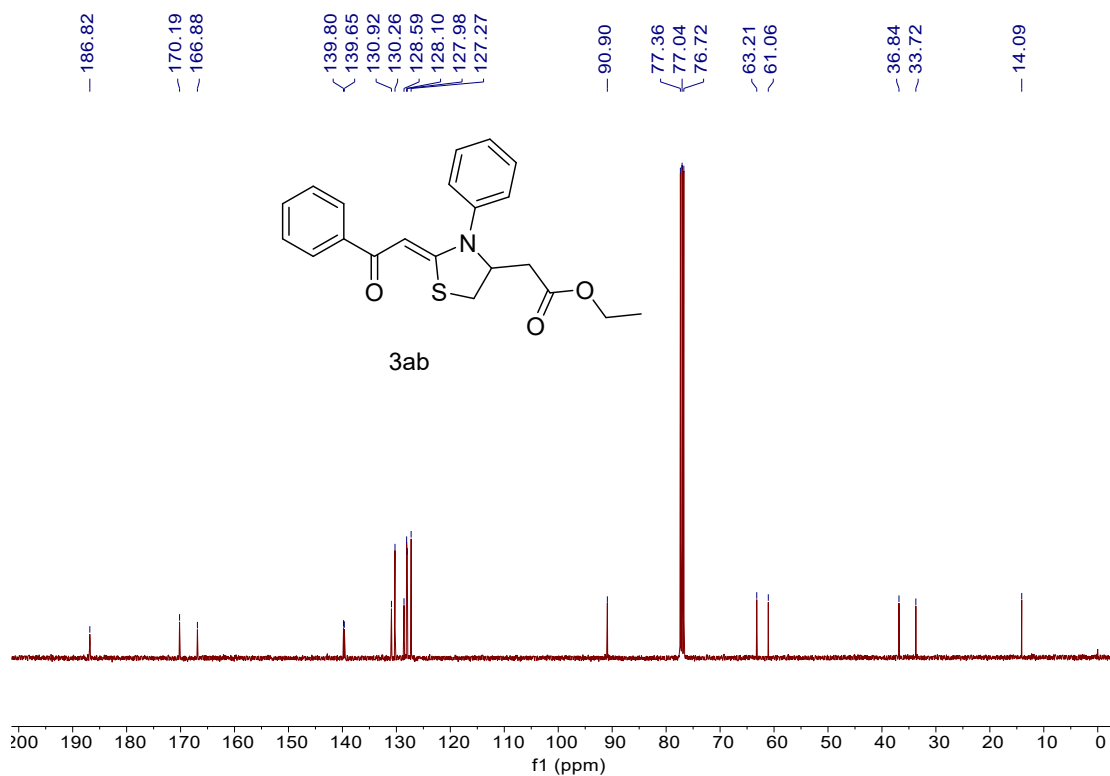

Figure S5. **3ab** ( $^{13}\text{C}$  NMR, 100 MHz,  $\text{CDCl}_3$ )

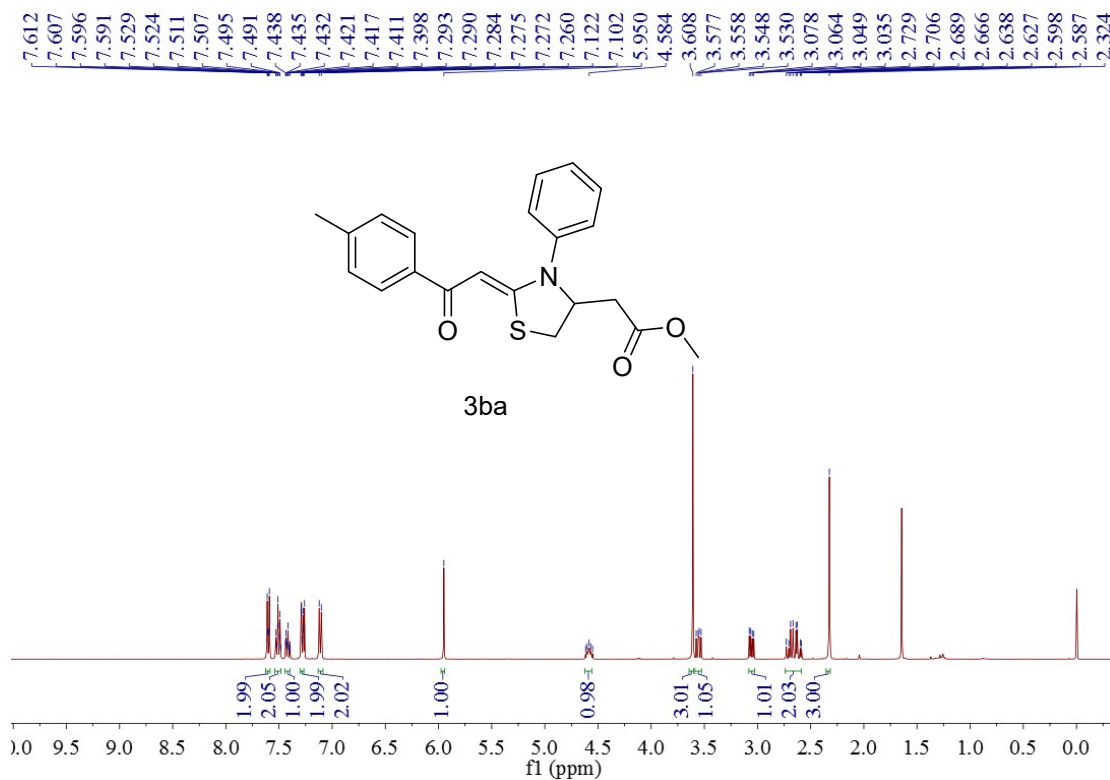

Figure S6. **3ba** ( $^1\text{H}$  NMR, 400 MHz,  $\text{CDCl}_3$ )

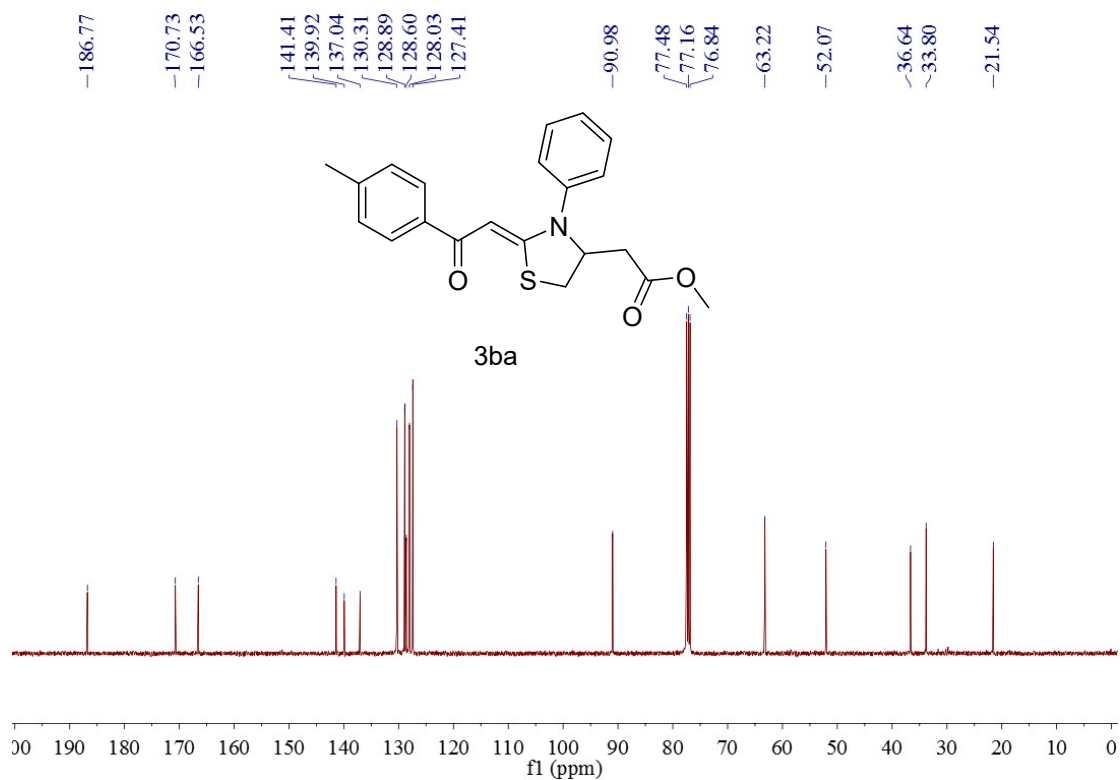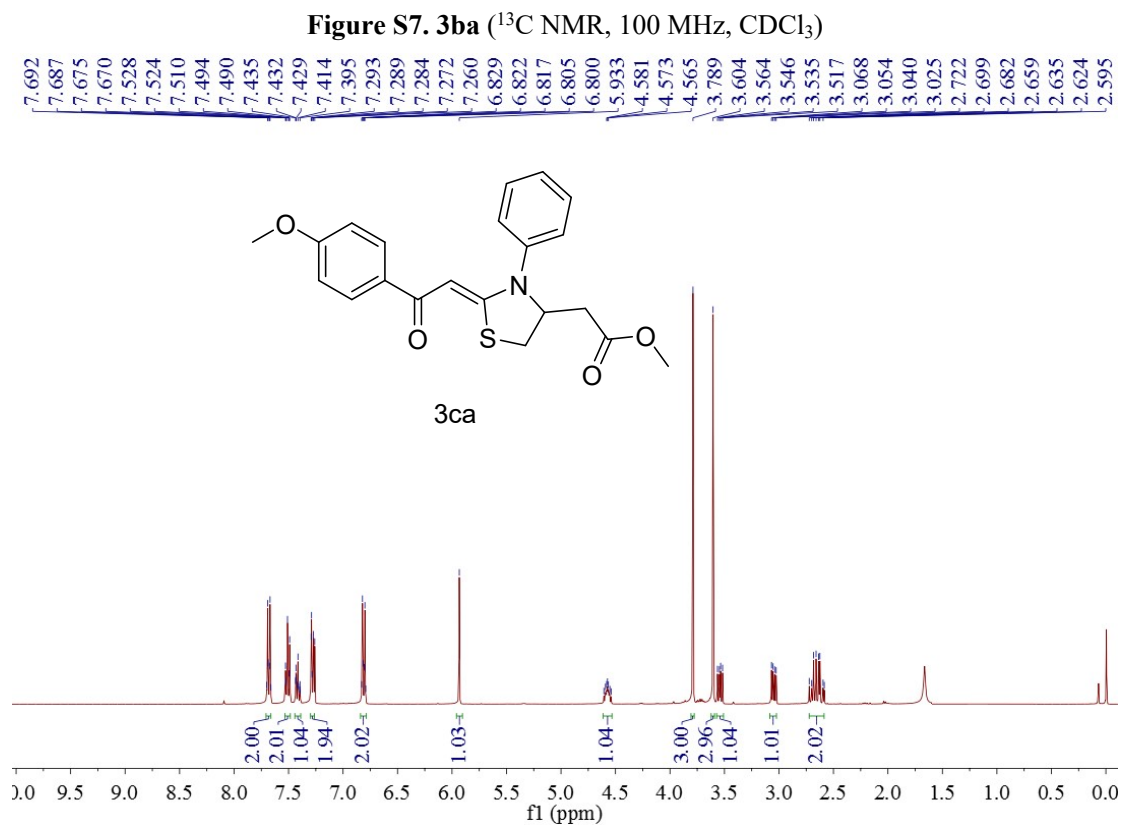

**Figure S8. 3ca** ( $^1\text{H}$  NMR, 400 MHz,  $\text{CDCl}_3$ )

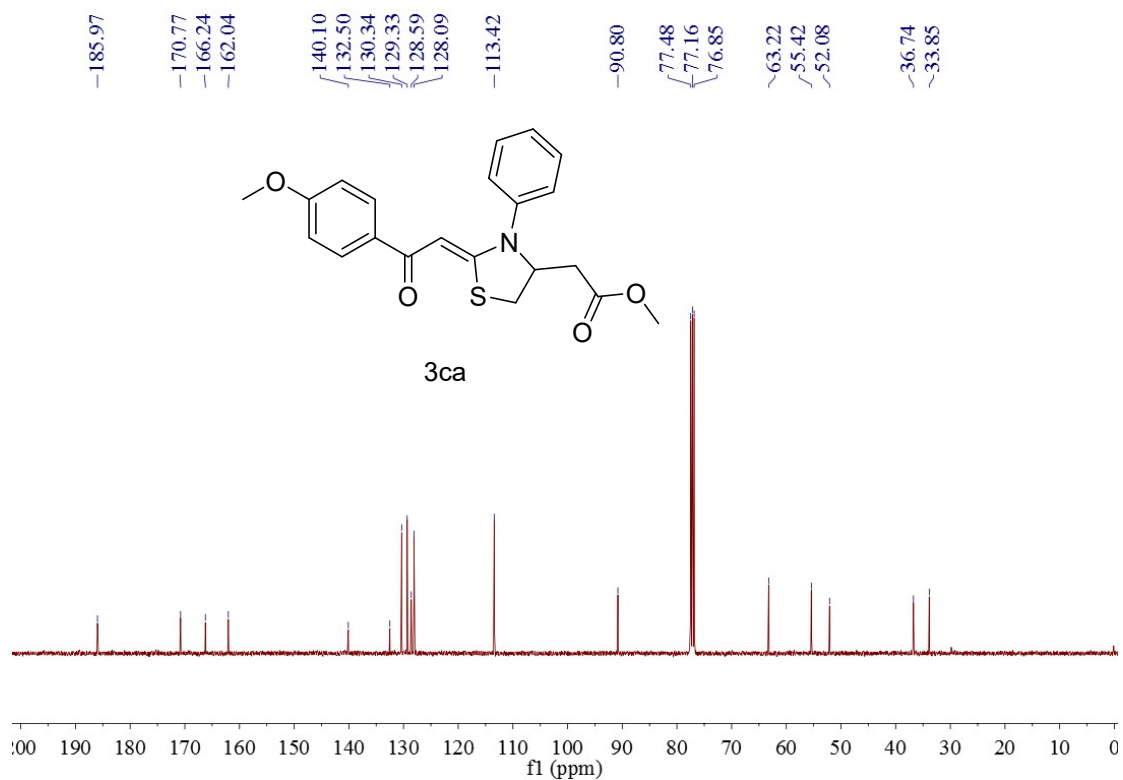

**Figure S9. 3ca** ( $^{13}\text{C}$  NMR, 100 MHz,  $\text{CDCl}_3$ )

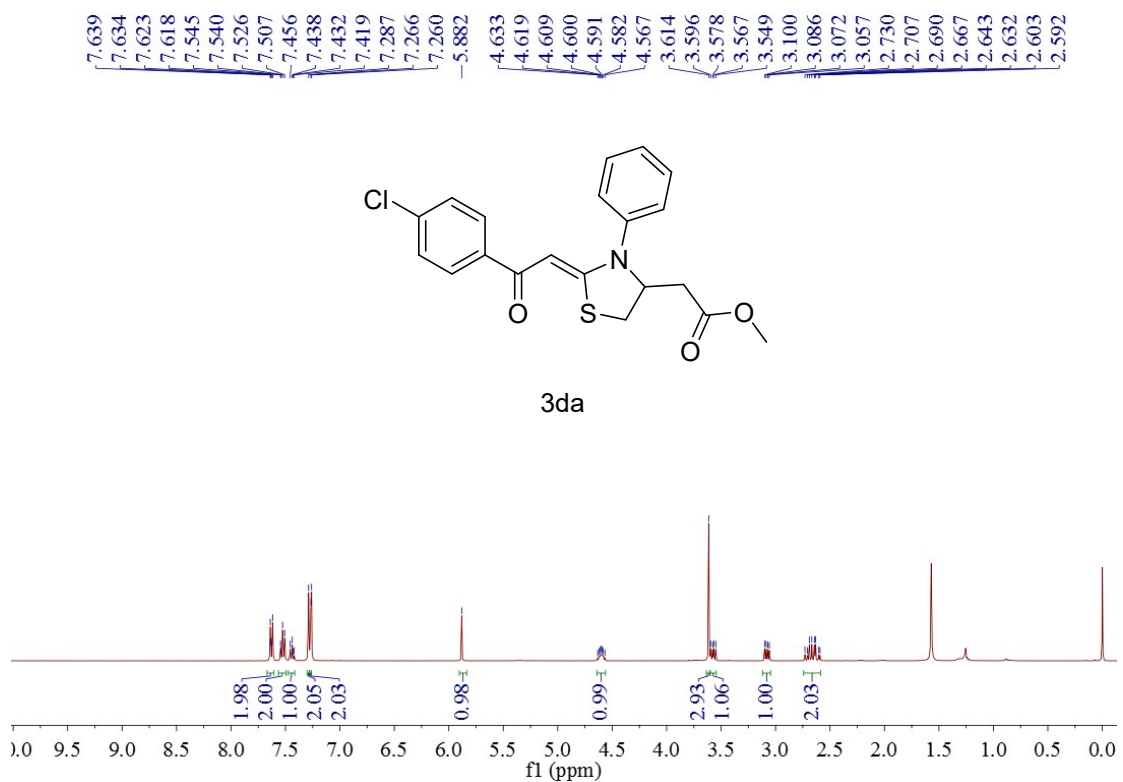

**Figure S10. 3da** ( $^1\text{H}$  NMR, 400 MHz,  $\text{CDCl}_3$ )

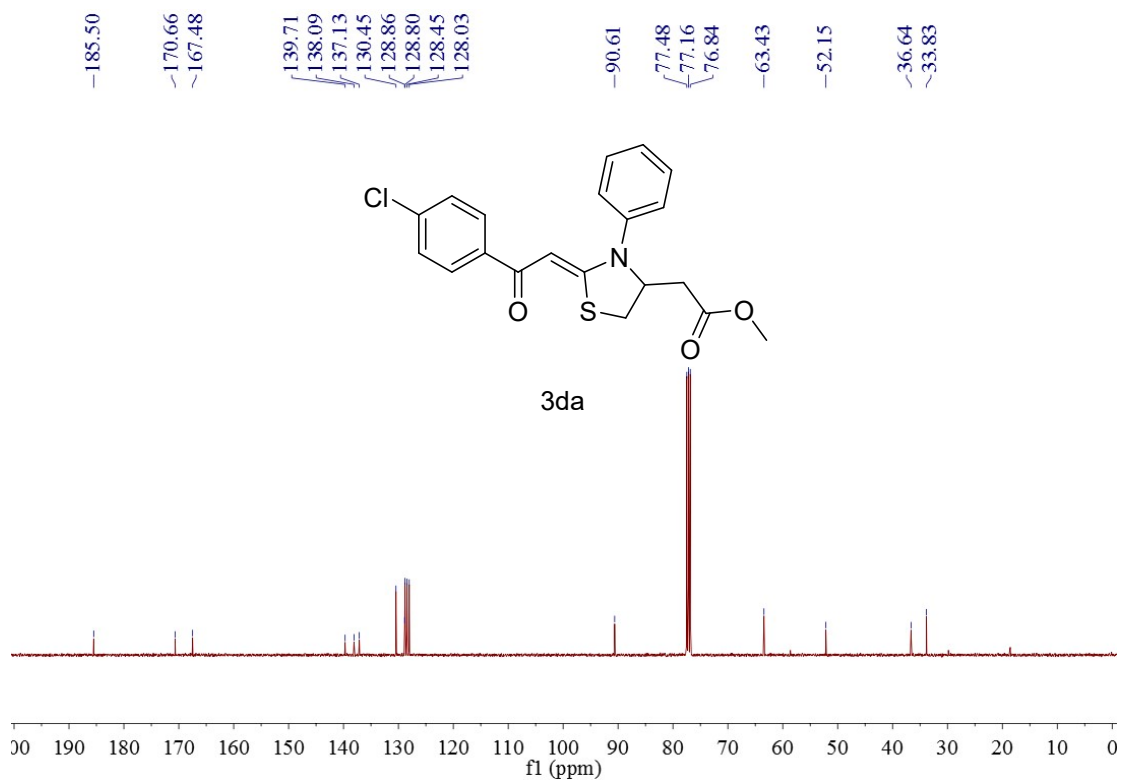

Figure S11. 3da (<sup>13</sup>C NMR, 100 MHz, CDCl<sub>3</sub>)

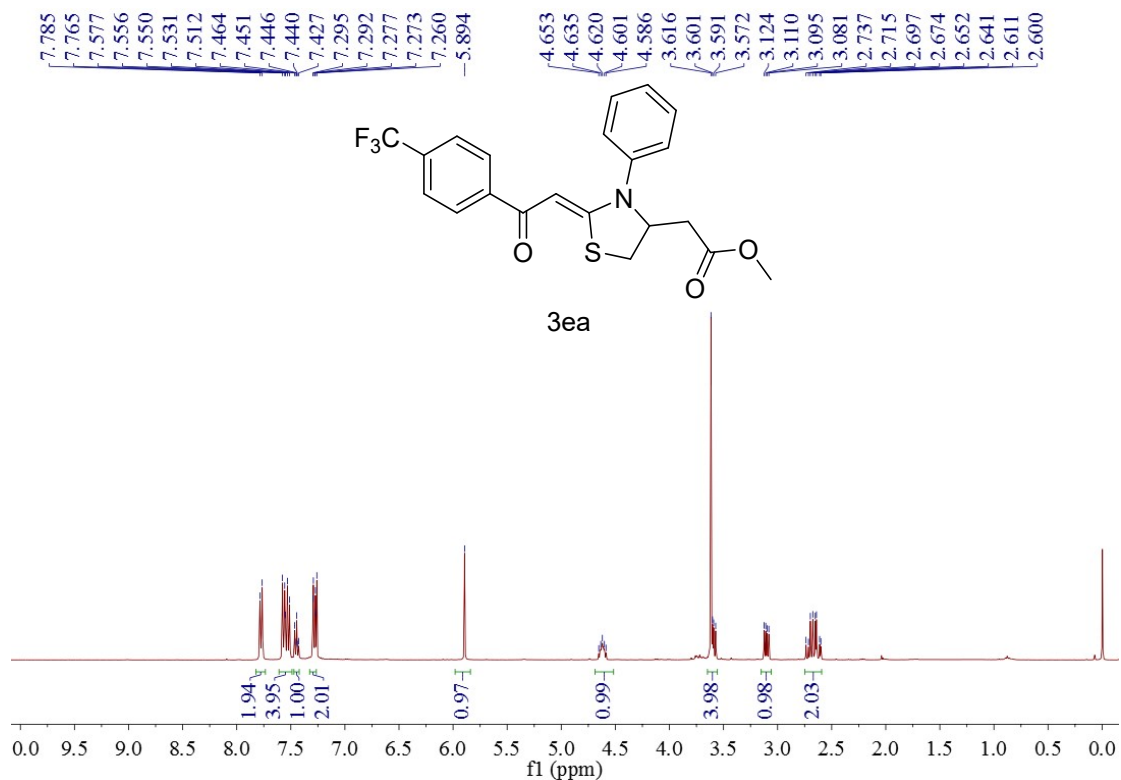

Figure S12. 3ea (<sup>1</sup>H NMR, 400 MHz, CDCl<sub>3</sub>)

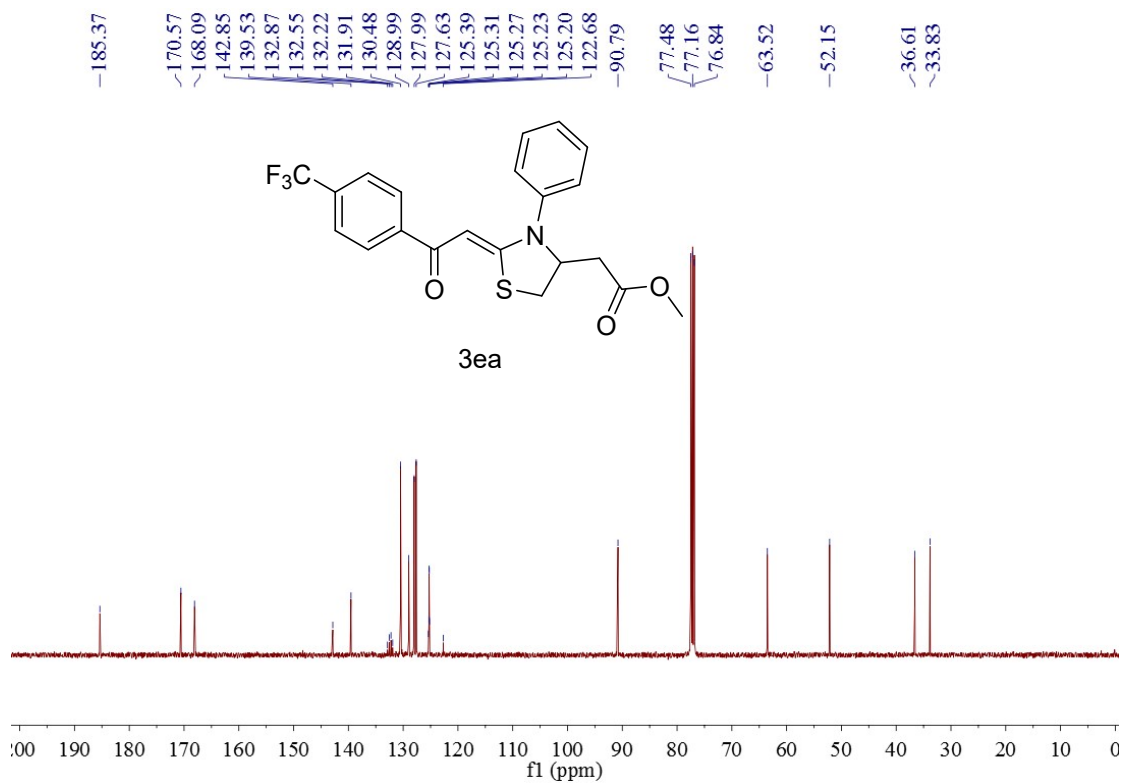

Figure S13. **3ea** ( $^{13}\text{C}$  NMR, 100 MHz,  $\text{CDCl}_3$ )

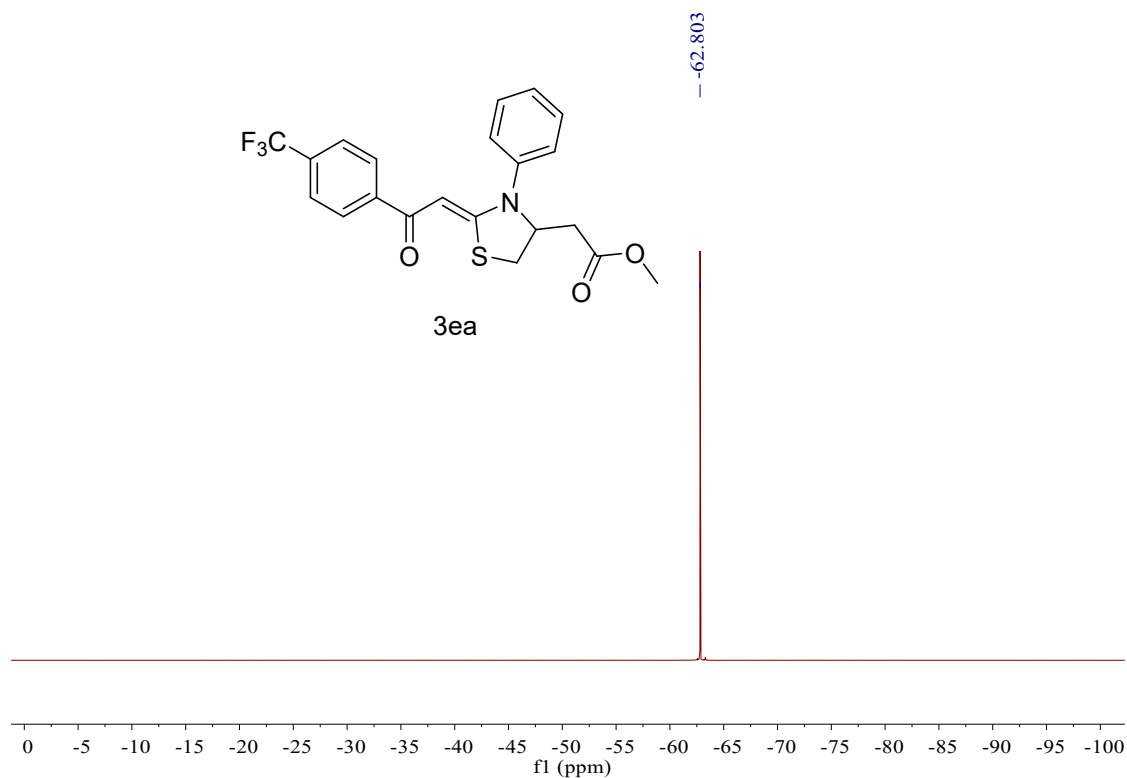

Figure S14. **3ea** ( $^{19}\text{F}$  NMR, 376 MHz,  $\text{CDCl}_3$ )



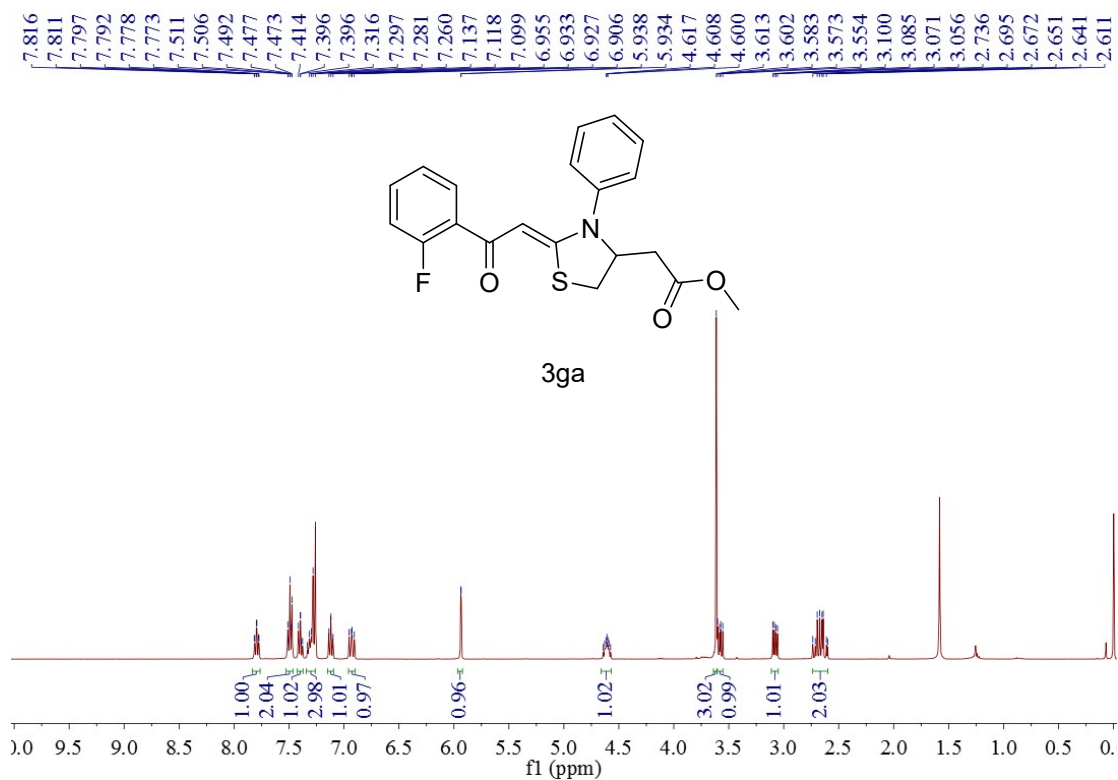

Figure S15. 3ga ( $^1\text{H}$  NMR, 400 MHz,  $\text{CDCl}_3$ )

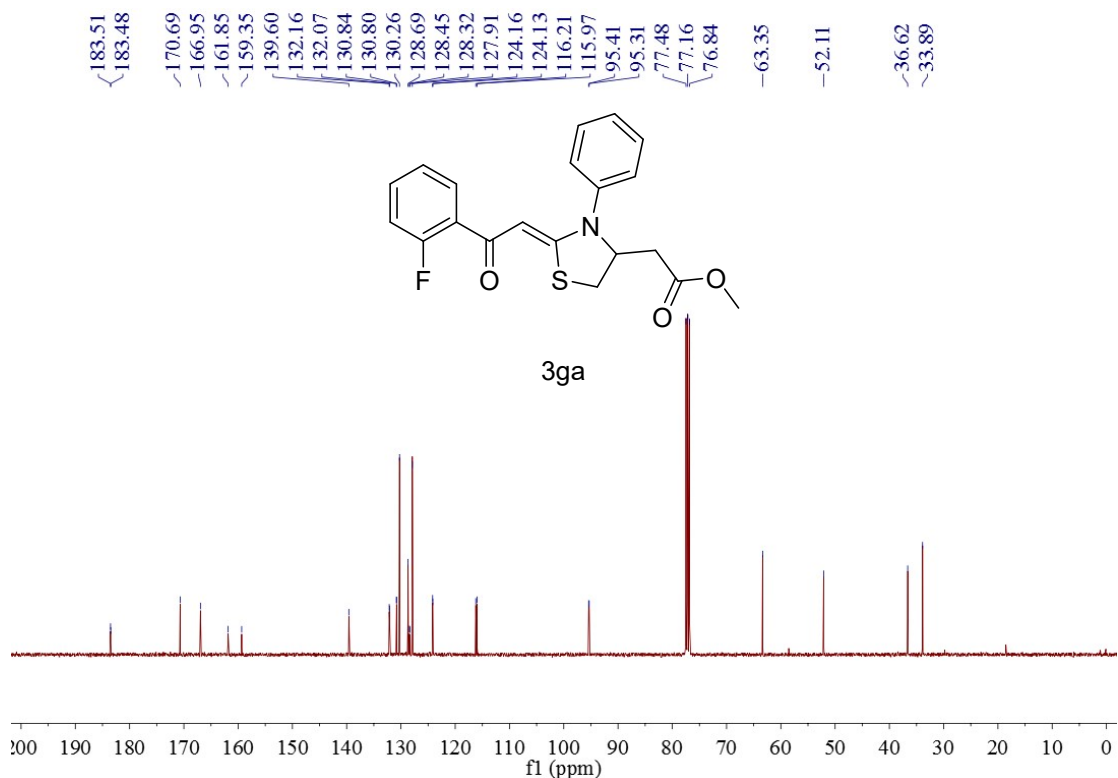

Figure S16. 3ga ( $^{13}\text{C}$  NMR, 100 MHz,  $\text{CDCl}_3$ )

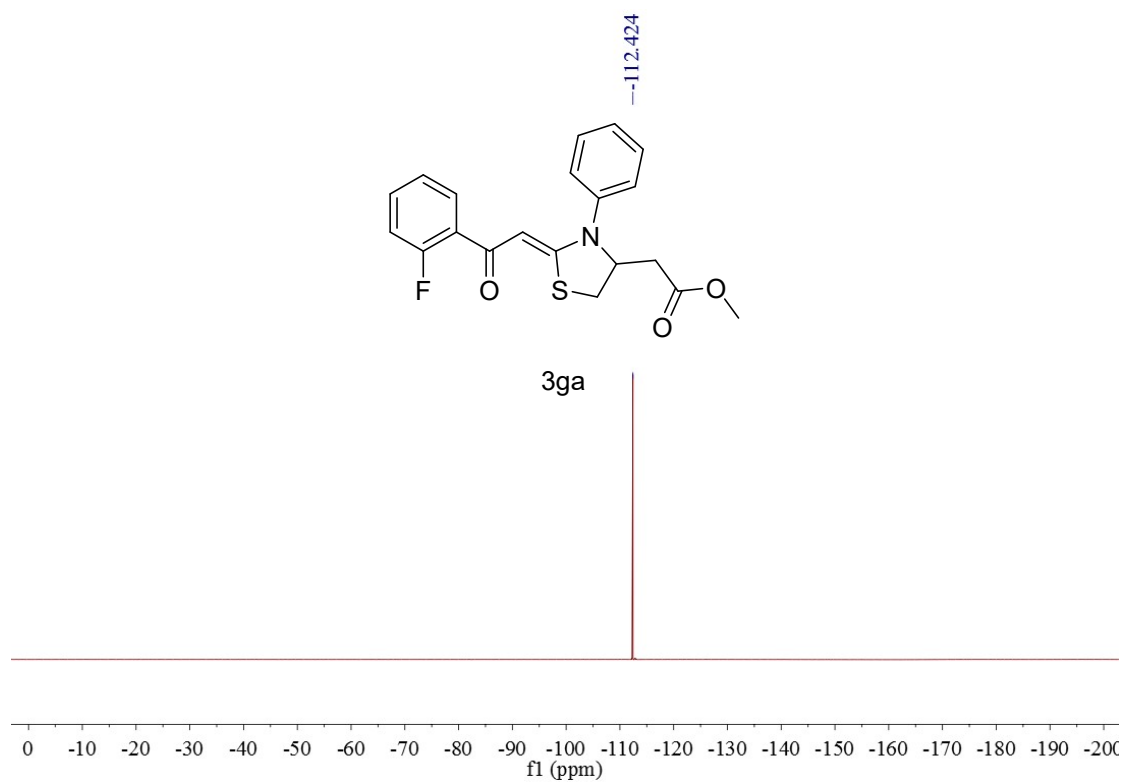

Figure S17. 3ga (<sup>19</sup>F NMR, 376 MHz, CDCl<sub>3</sub>)

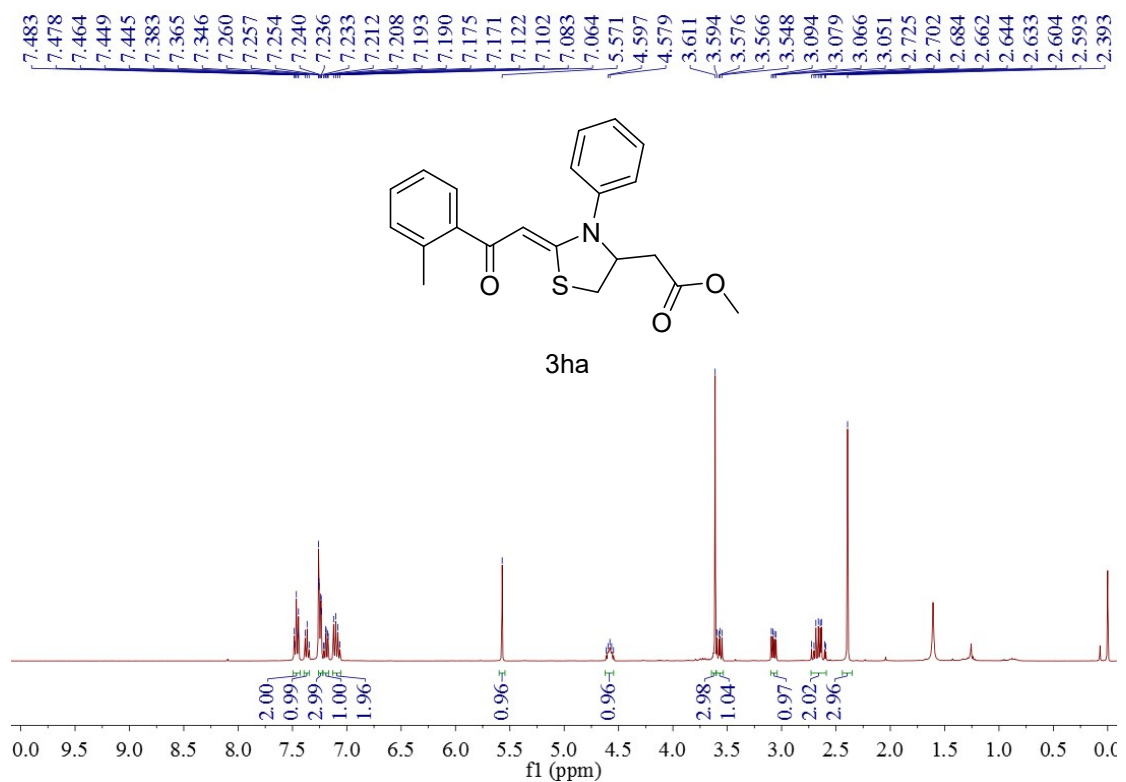

Figure S18. 3ha (<sup>1</sup>H NMR, 400 MHz, CDCl<sub>3</sub>)

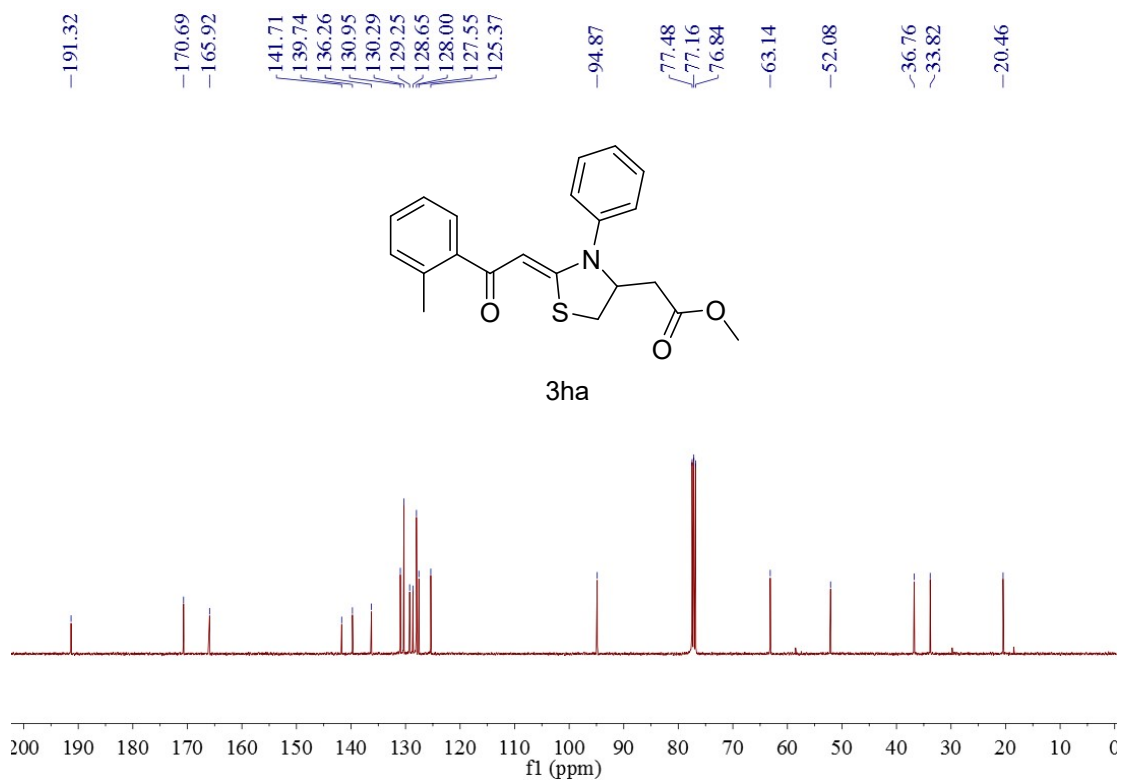

**Figure S19. 3ha** ( $^{13}\text{C}$  NMR, 100 MHz,  $\text{CDCl}_3$ )

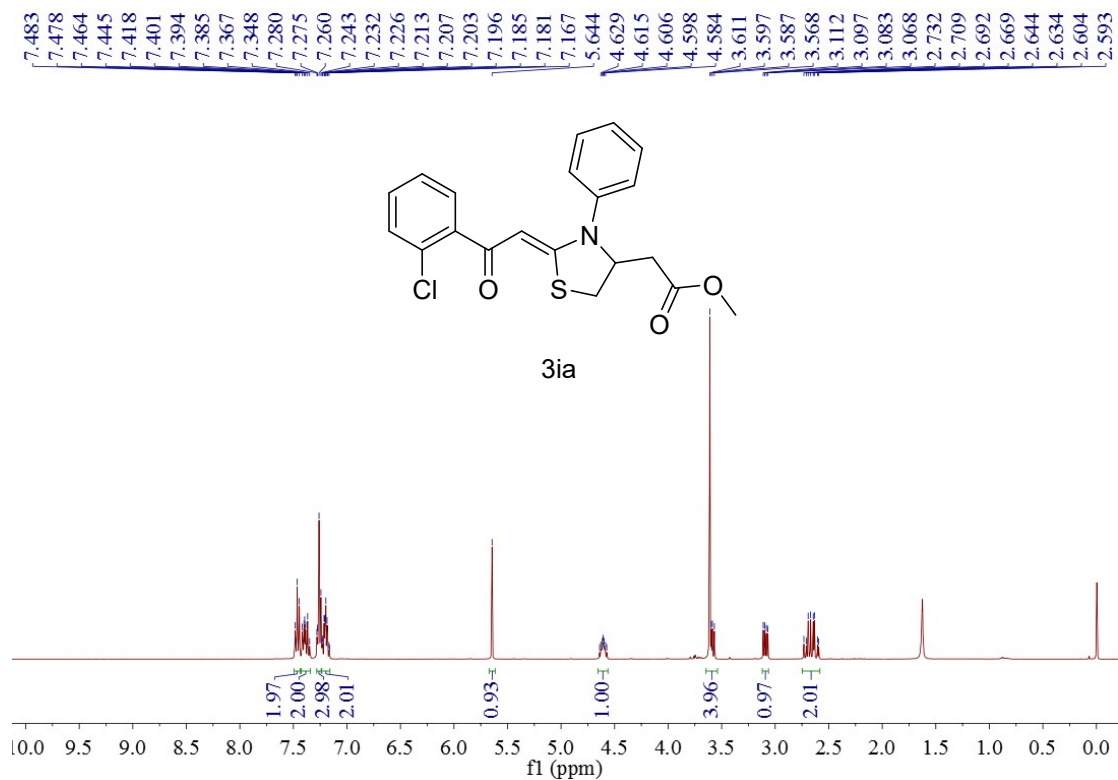

**Figure S20. 3ia** ( $^1\text{H}$  NMR, 400 MHz,  $\text{CDCl}_3$ )

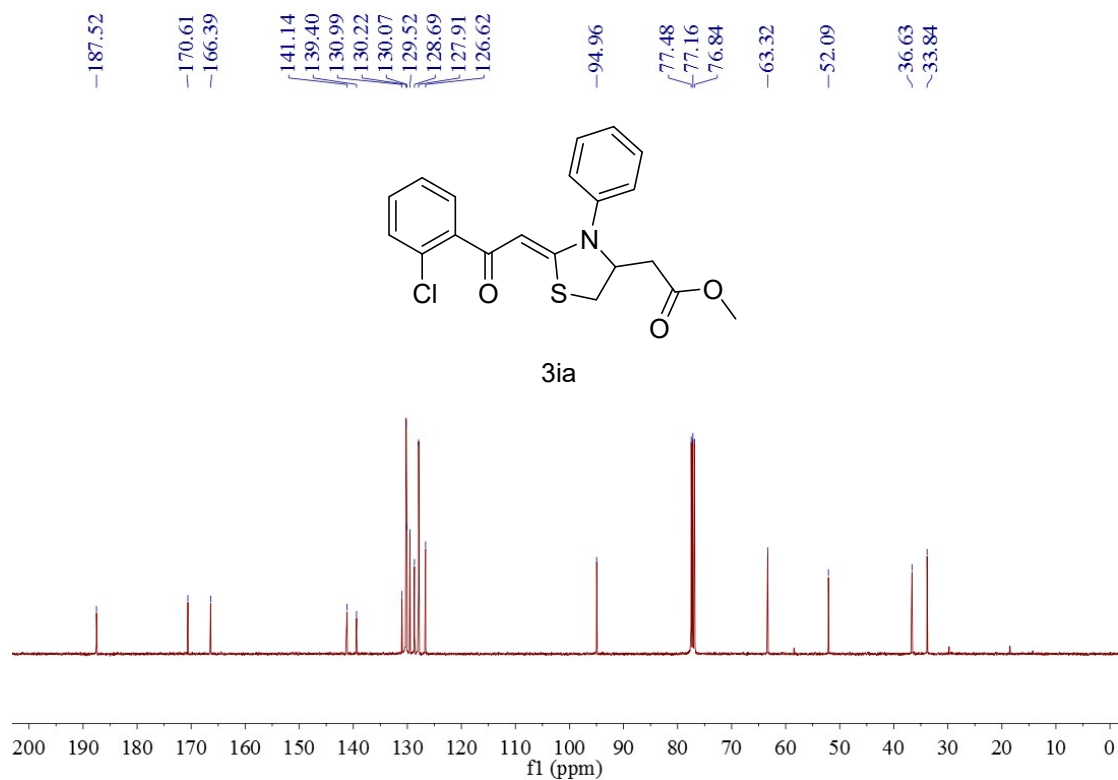

Figure S21. **3ia** ( $^{13}\text{C}$  NMR, 100 MHz,  $\text{CDCl}_3$ )

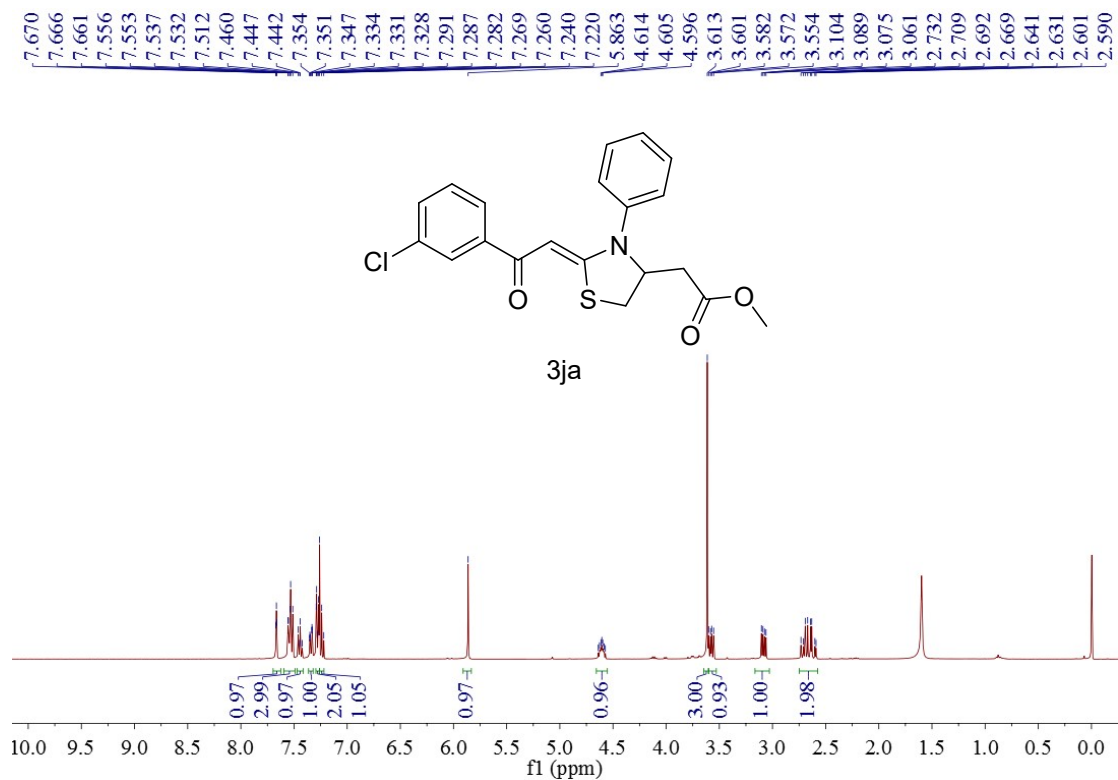

Figure S22. **3ja** ( $^1\text{H}$  NMR, 400 MHz,  $\text{CDCl}_3$ )

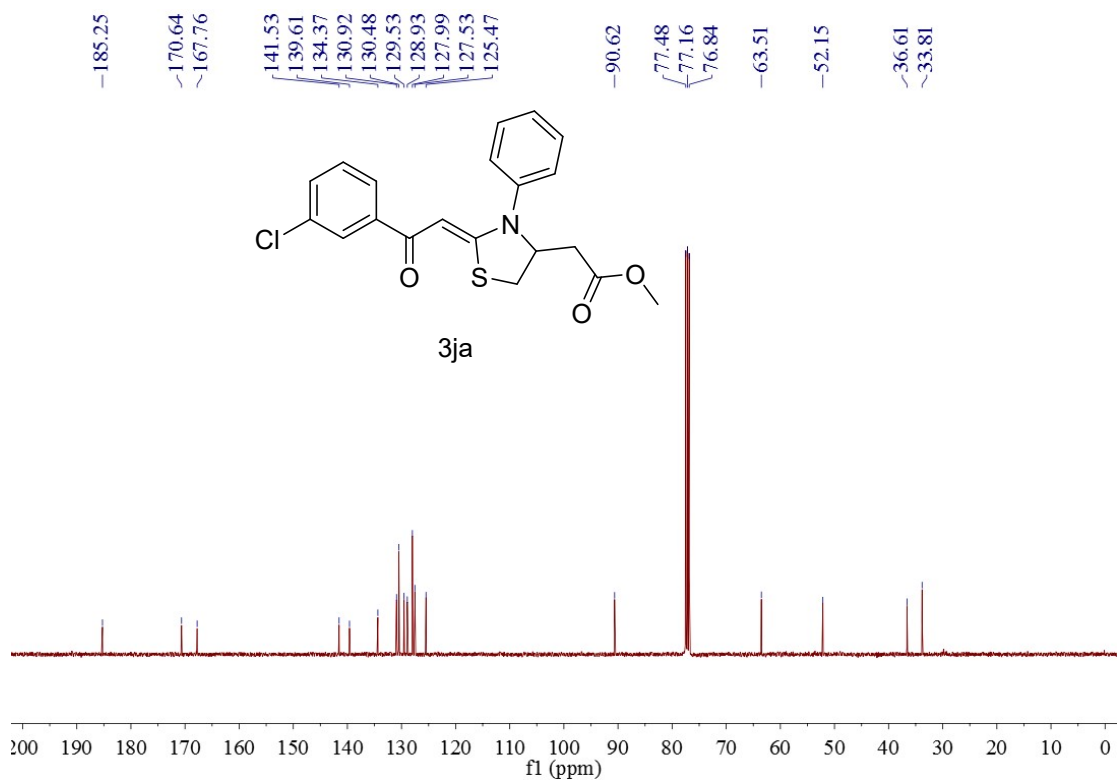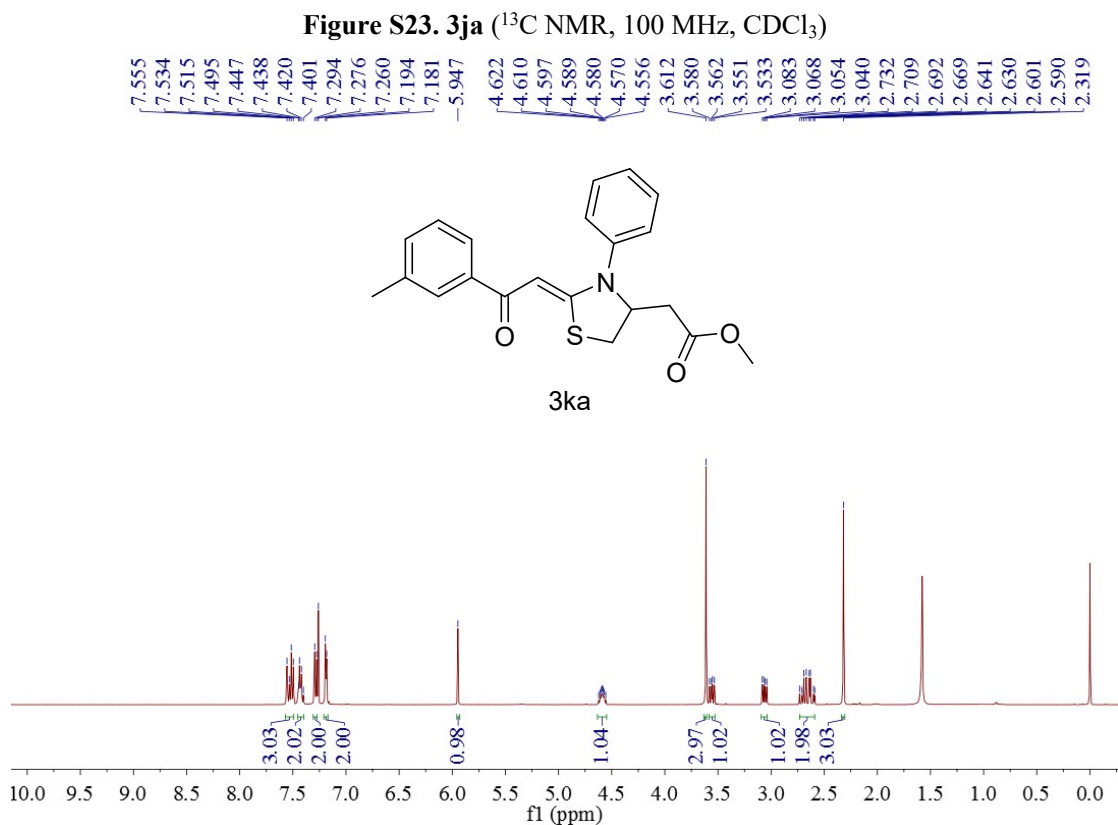

**Figure S24. 3ka** ( $^1\text{H}$  NMR, 400 MHz,  $\text{CDCl}_3$ )

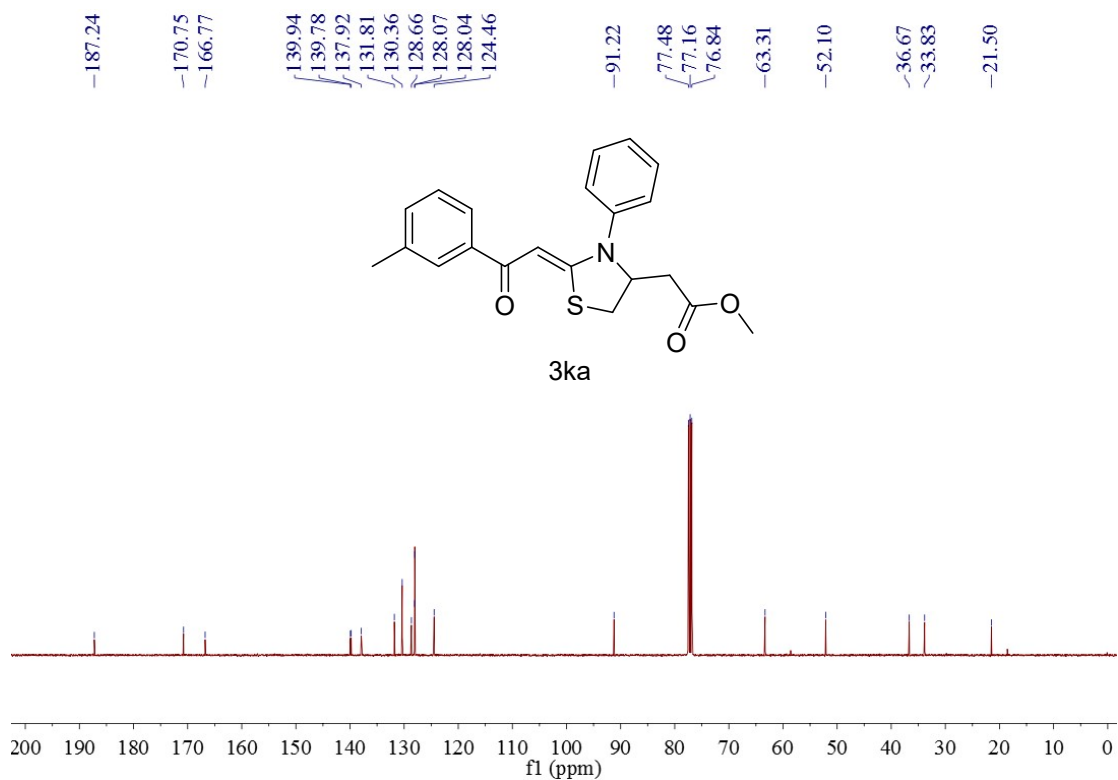

**Figure S25. 3ka** ( $^{13}\text{C}$  NMR, 100 MHz,  $\text{CDCl}_3$ )

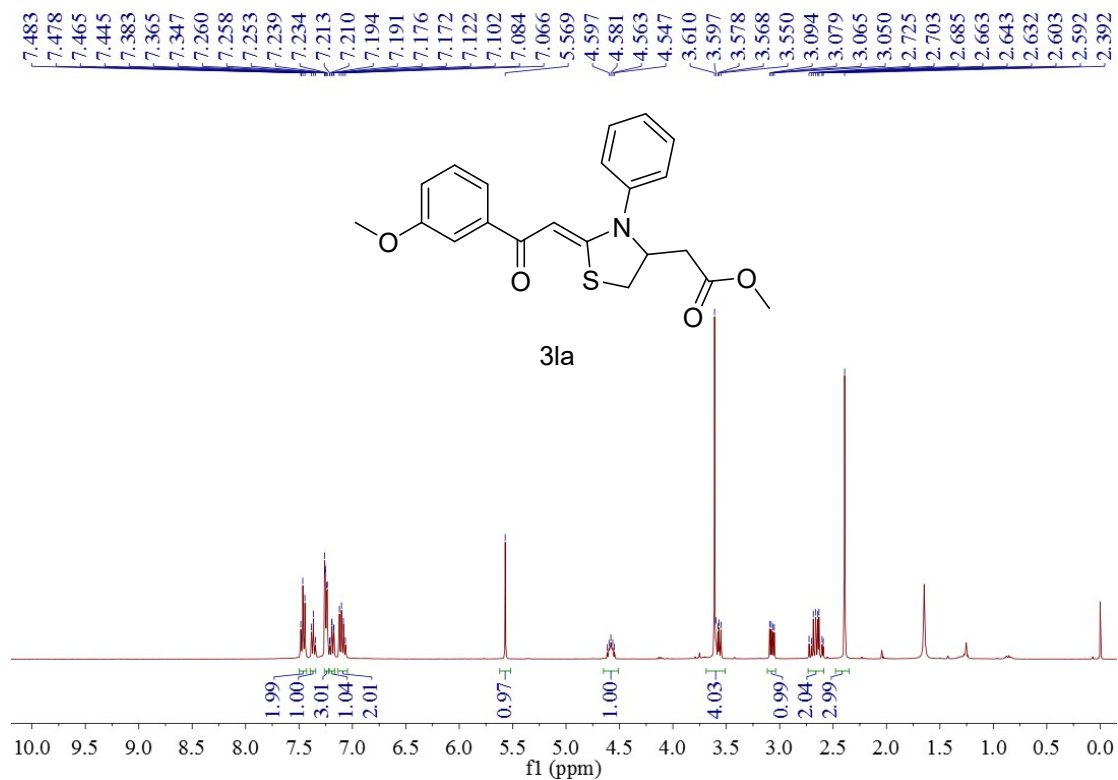

**Figure S26. 3la** ( $^1\text{H}$  NMR, 400 MHz,  $\text{CDCl}_3$ )

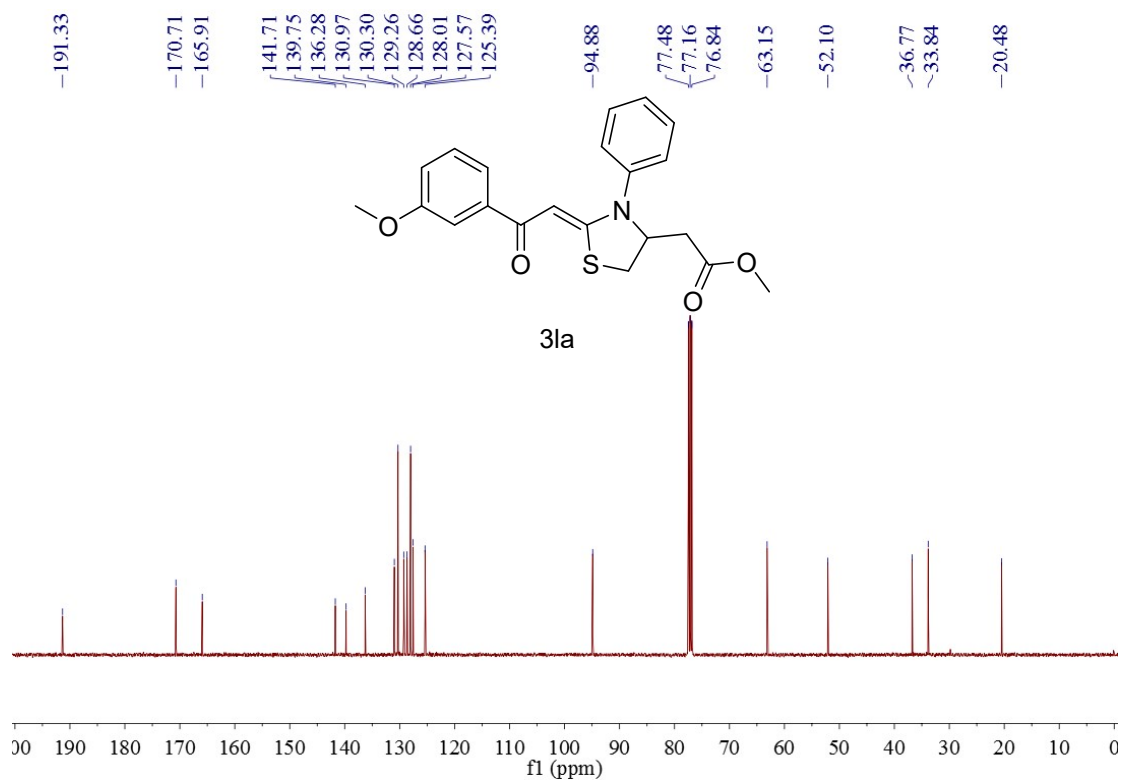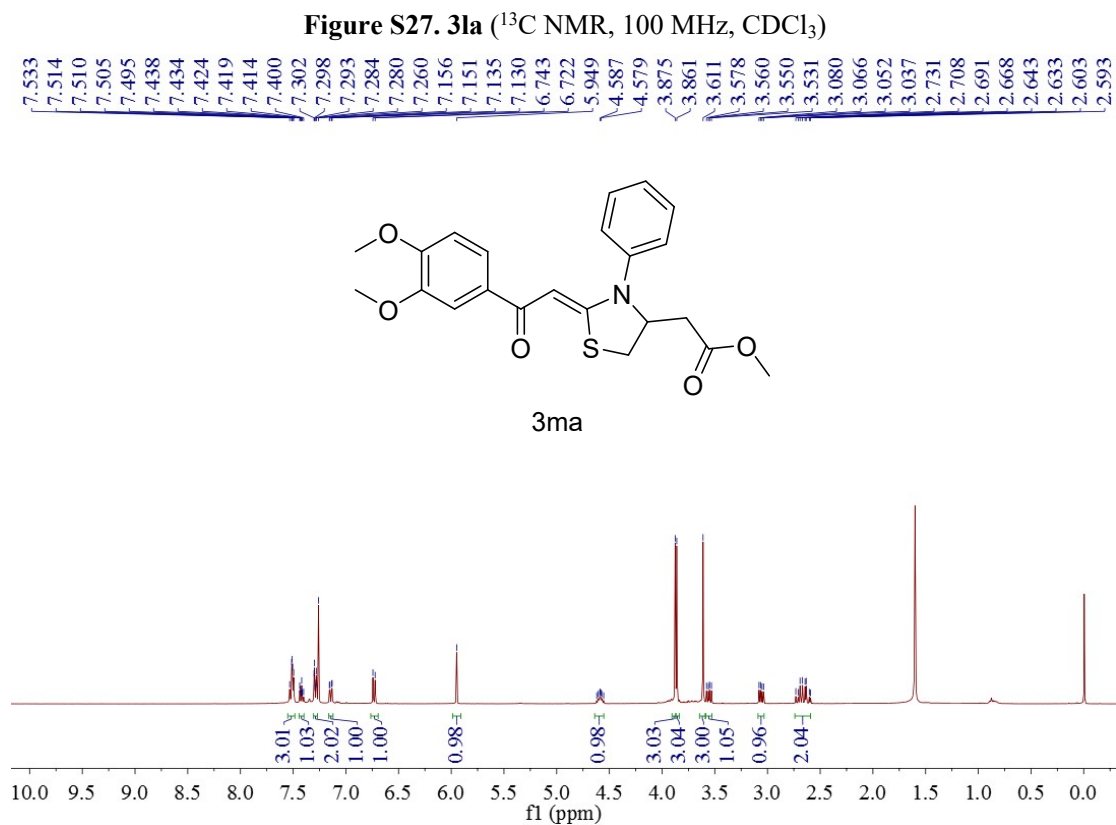

**Figure S28. 3ma** ( $^1\text{H}$  NMR, 400 MHz,  $\text{CDCl}_3$ )

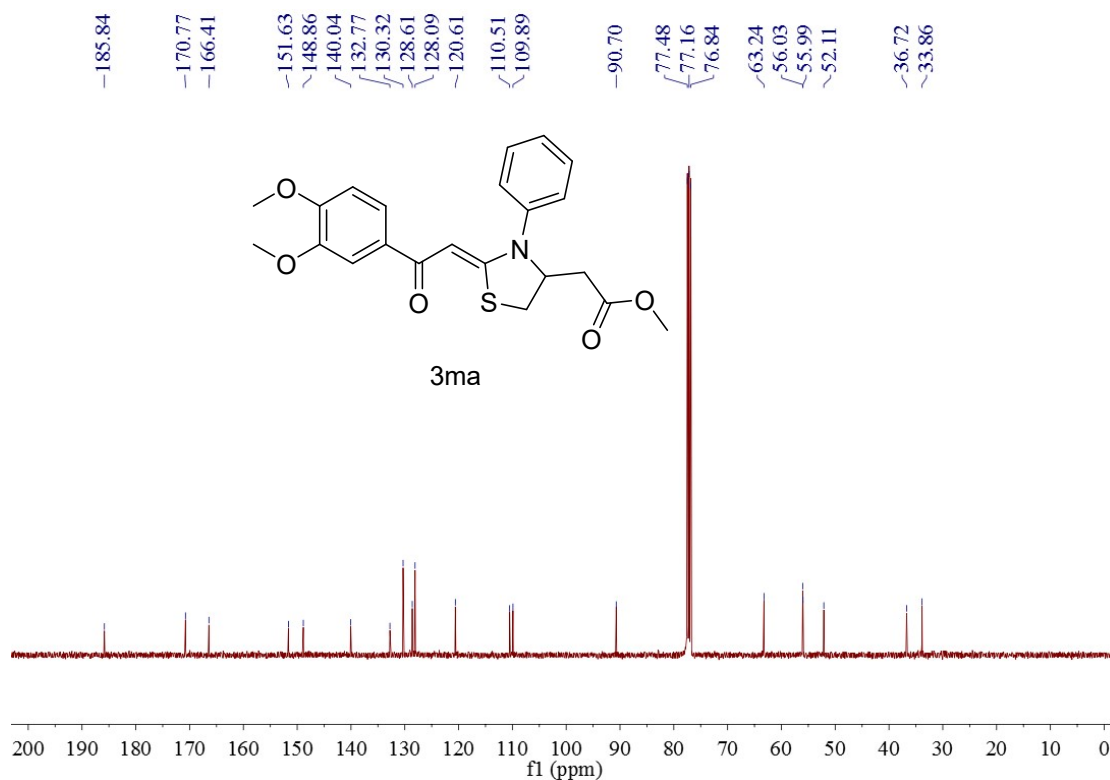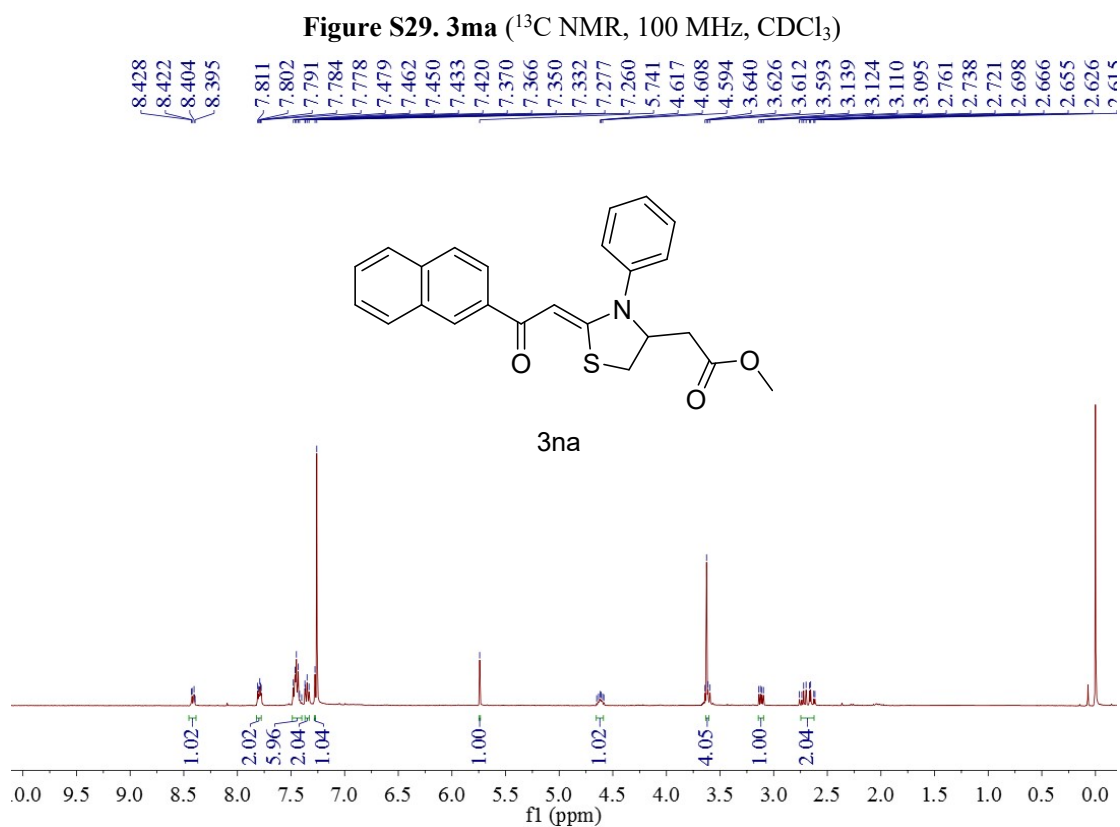

**Figure S30. 3na** ( $^1\text{H}$  NMR, 400 MHz,  $\text{CDCl}_3$ )



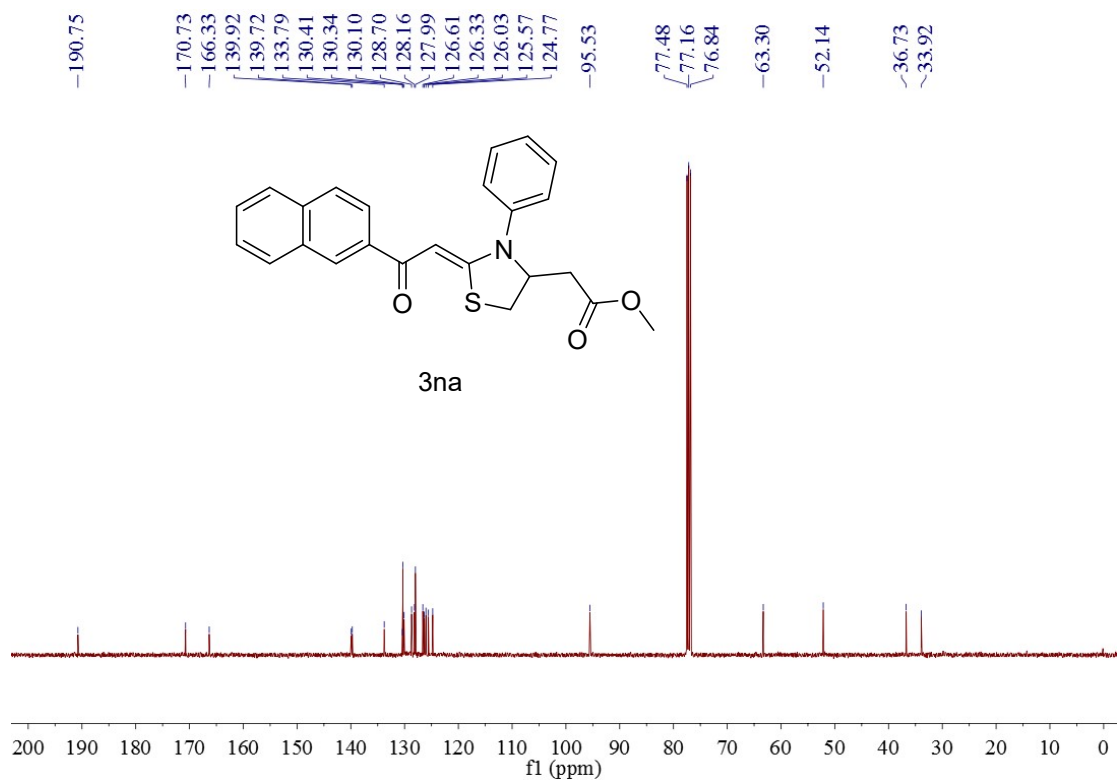

Figure S31. 3na (<sup>13</sup>C NMR, 100 MHz, CDCl<sub>3</sub>)

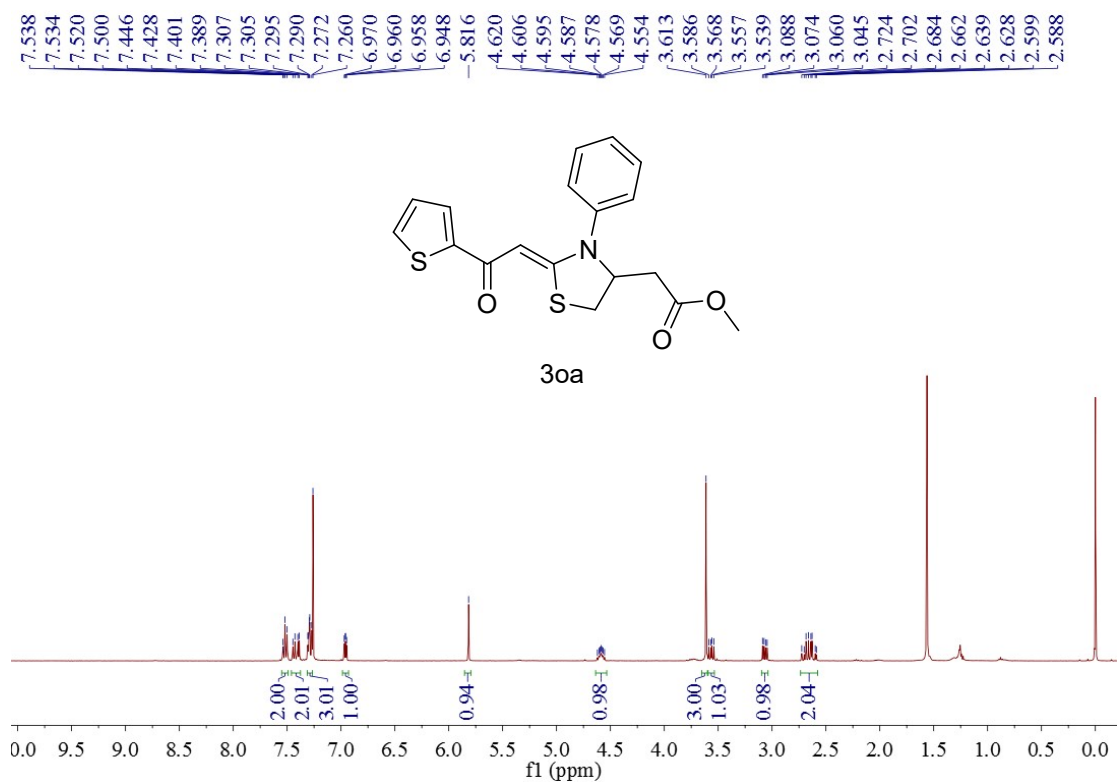

Figure S32. 3oa (<sup>1</sup>H NMR, 400 MHz, CDCl<sub>3</sub>)

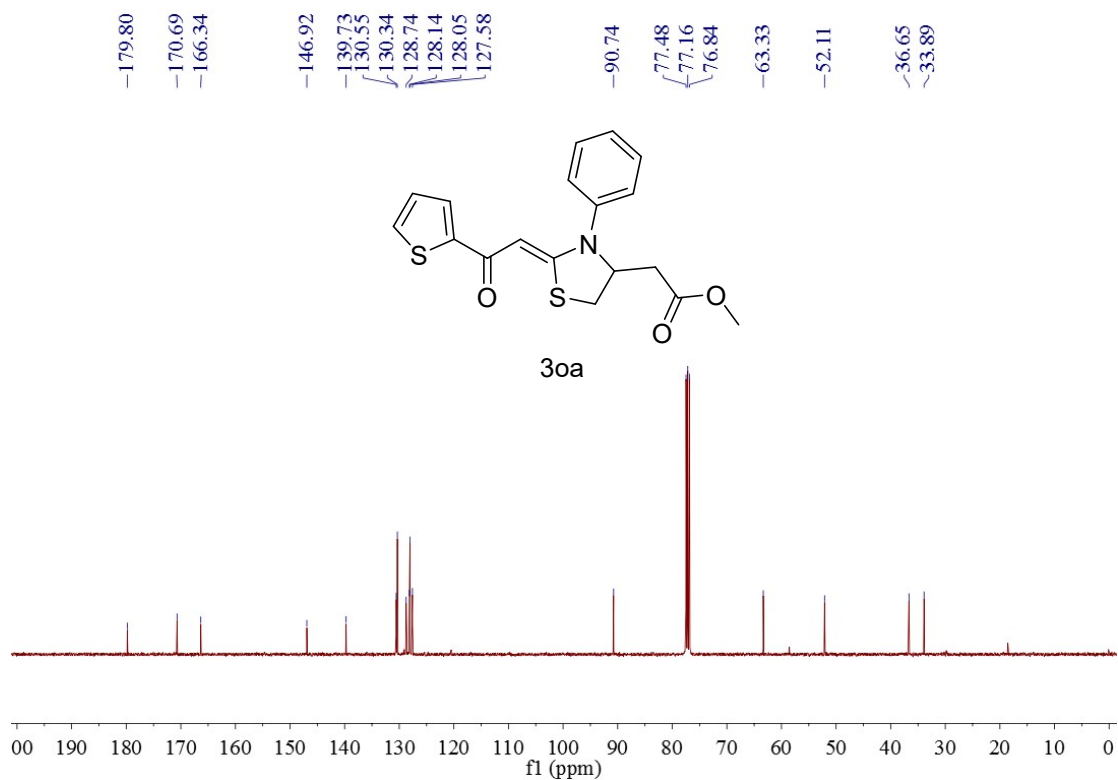

**Figure S33. 30a** ( $^{13}\text{C}$  NMR, 100 MHz,  $\text{CDCl}_3$ )

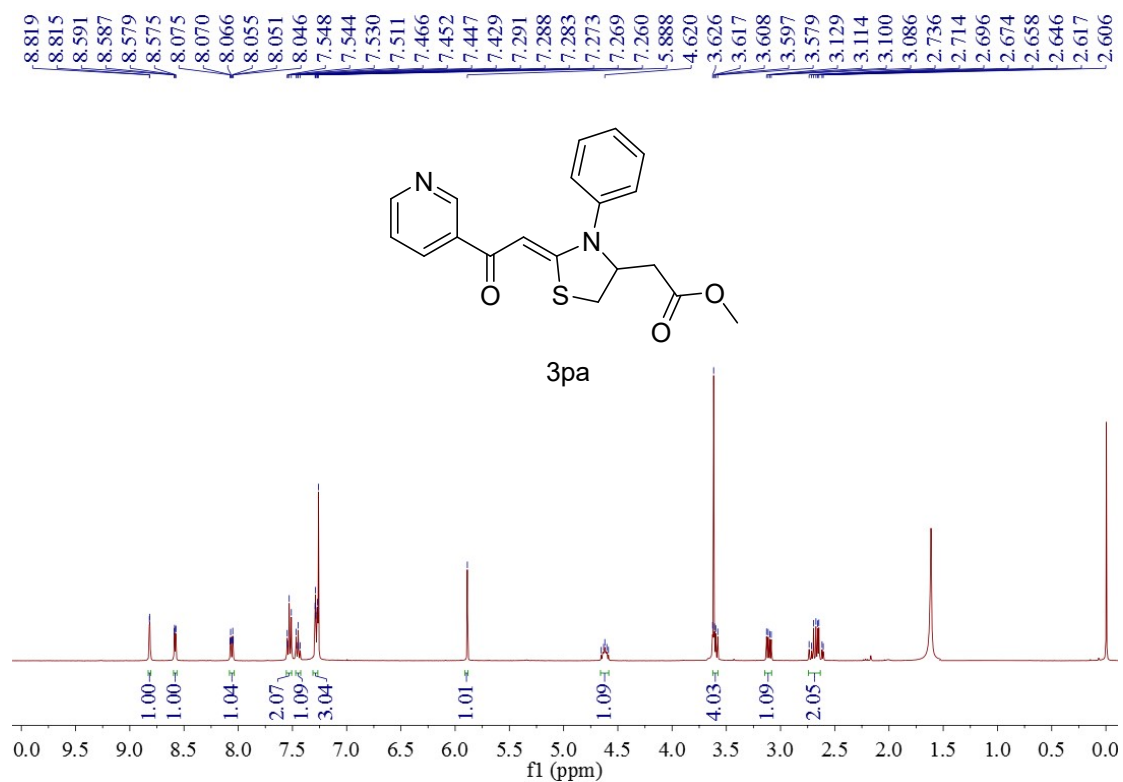

**Figure S34. 3pa** ( $^1\text{H}$  NMR, 400 MHz,  $\text{CDCl}_3$ )

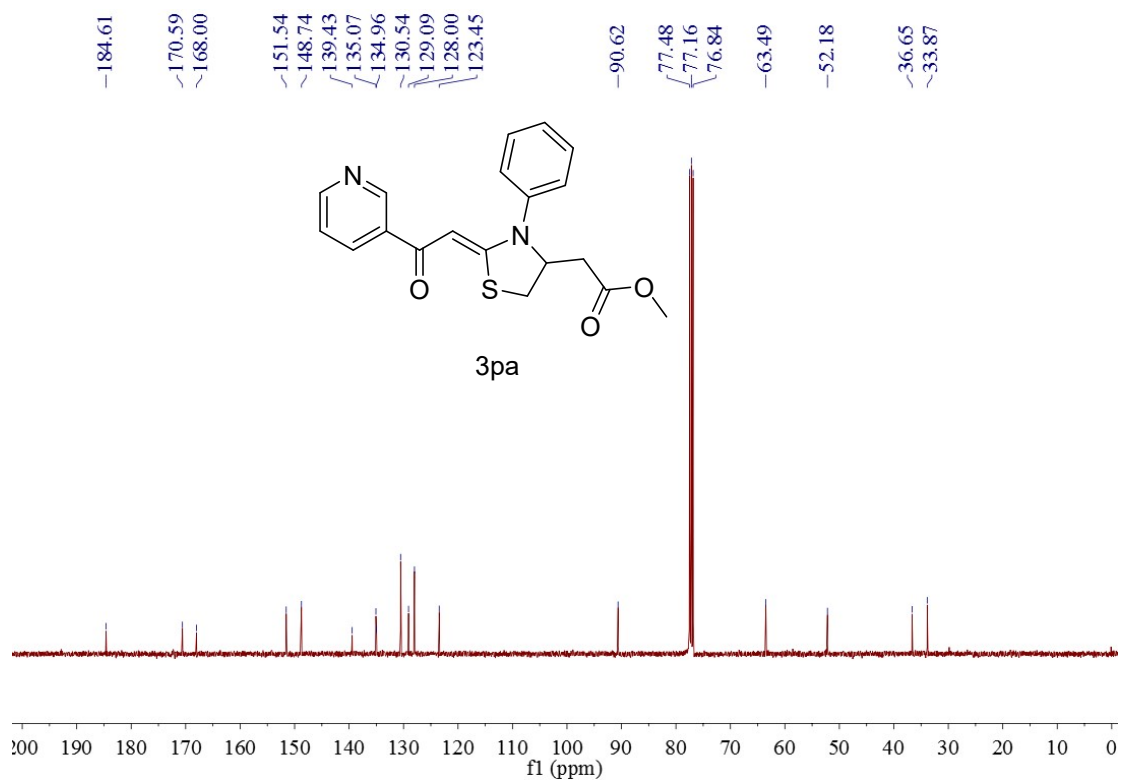

**Figure S35. 3pa** ( $^{13}\text{C}$  NMR, 100 MHz,  $\text{CDCl}_3$ )

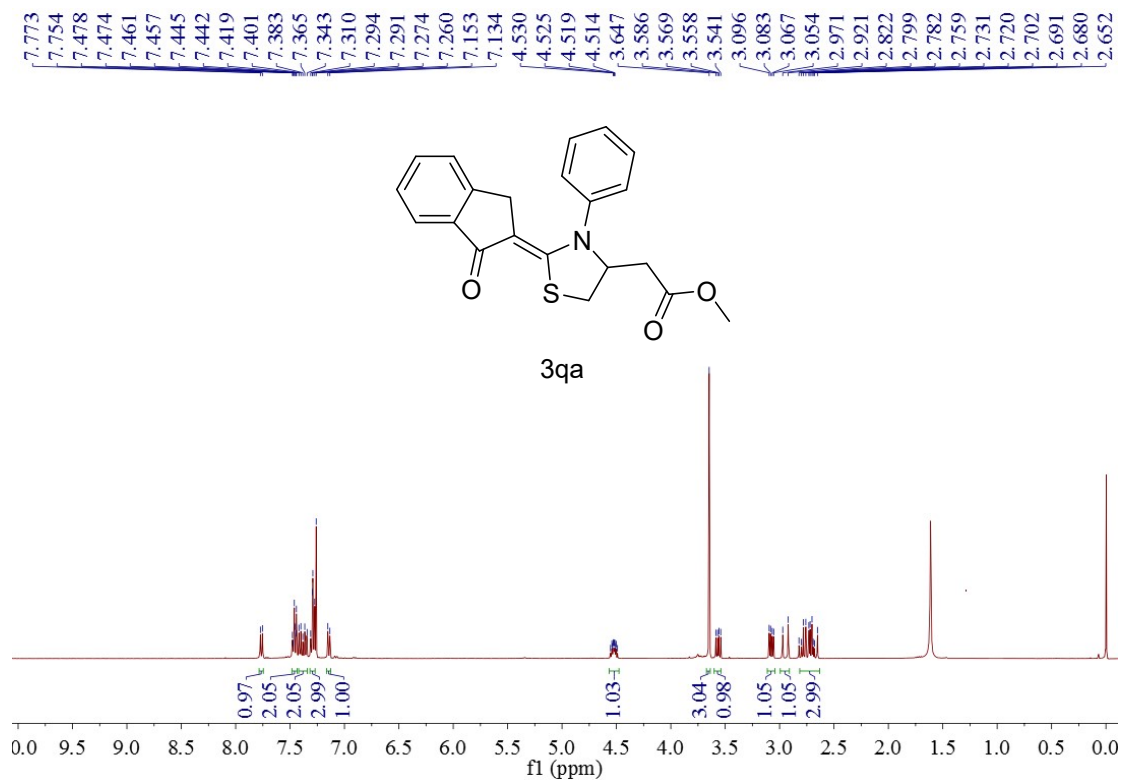

**Figure S36. 3qa** ( $^1\text{H}$  NMR, 400 MHz,  $\text{CDCl}_3$ )

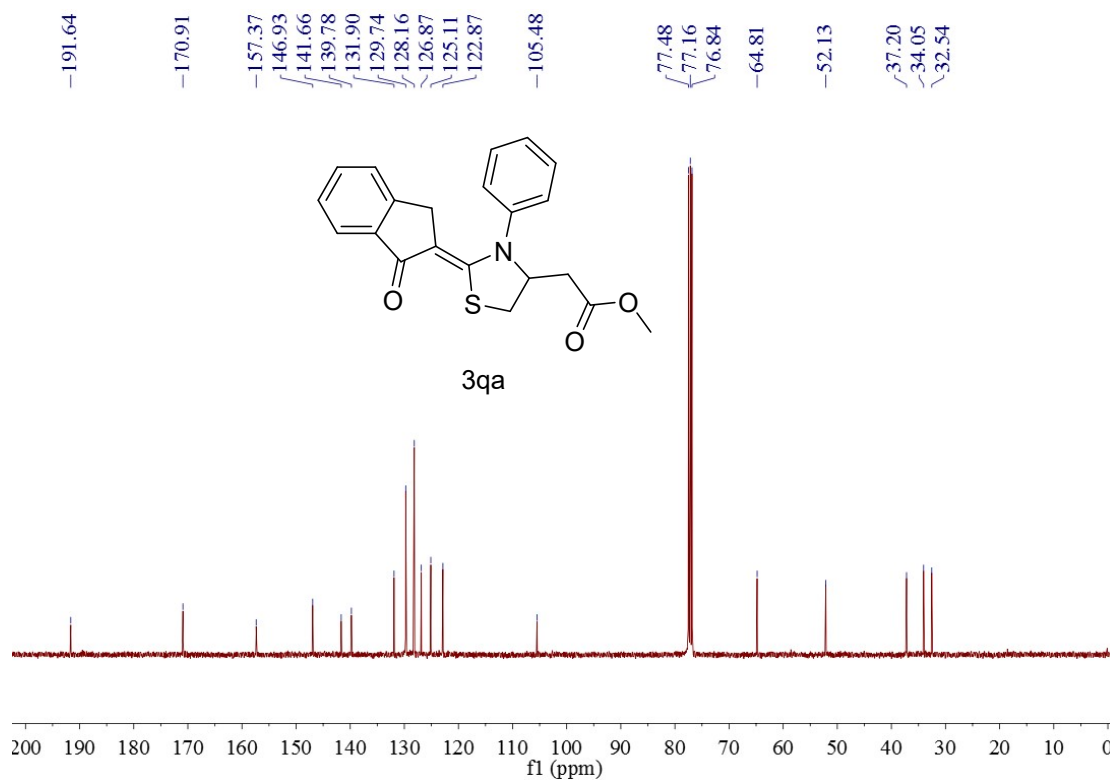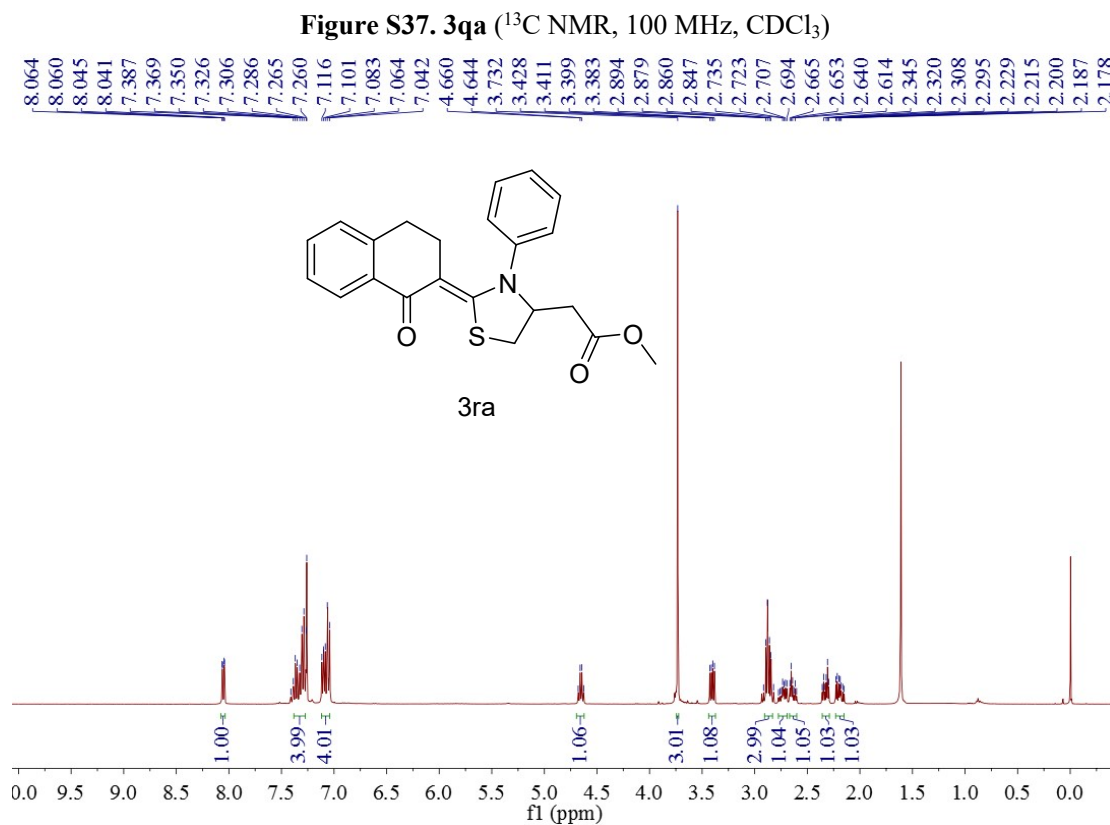

**Figure S38. 3ra** (<sup>1</sup>H NMR, 400 MHz, CDCl<sub>3</sub>)

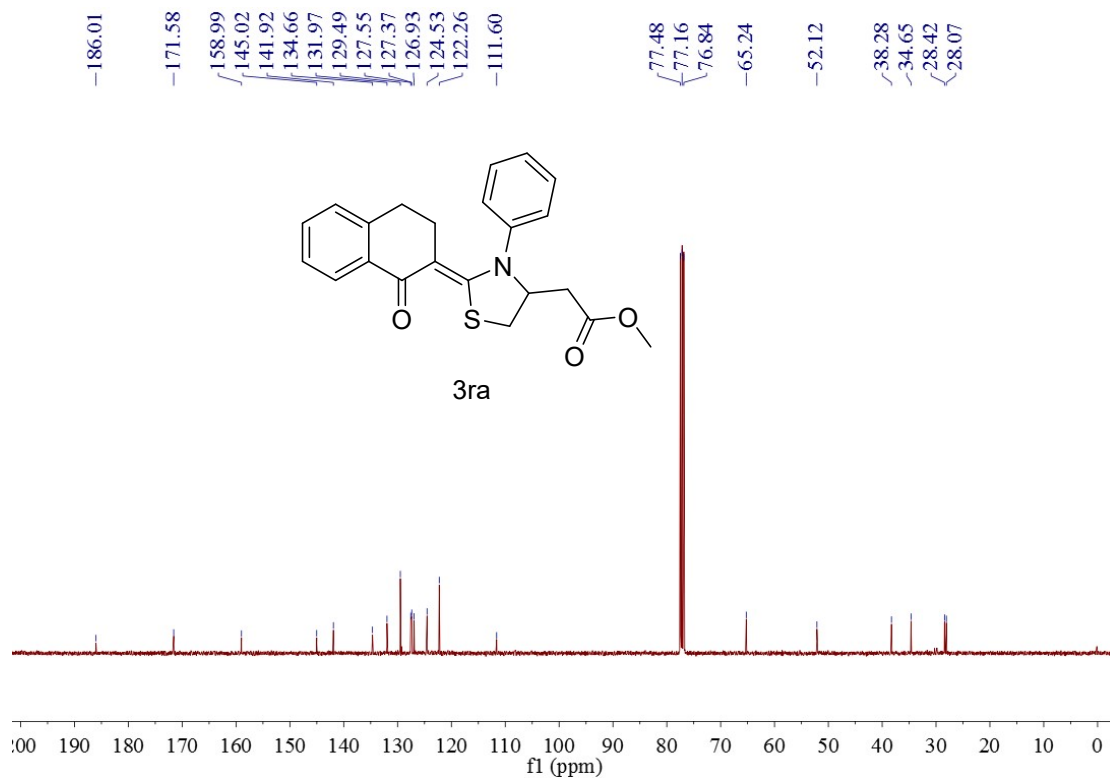

Figure S39. 3ra (<sup>13</sup>C NMR, 100 MHz, CDCl<sub>3</sub>)

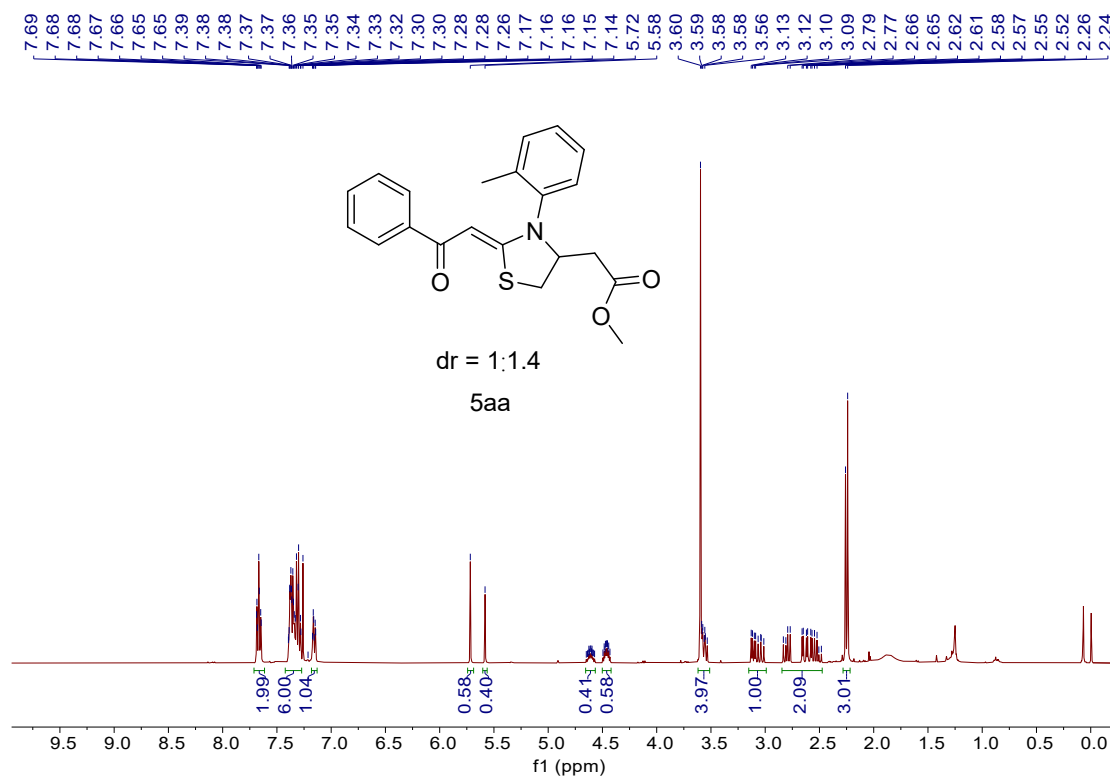

Figure S40. 5aa (<sup>1</sup>H NMR, 400 MHz, CDCl<sub>3</sub>)

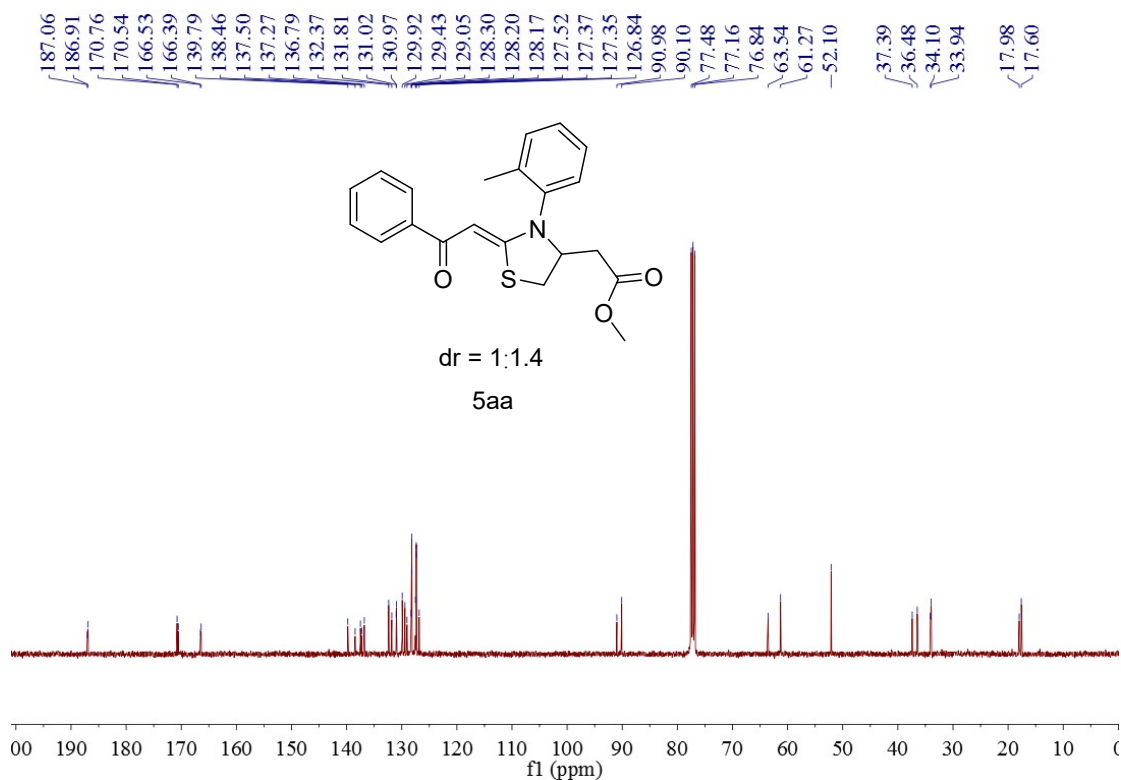

Figure S41. 5aa ( $^{13}\text{C}$  NMR, 100 MHz,  $\text{CDCl}_3$ )

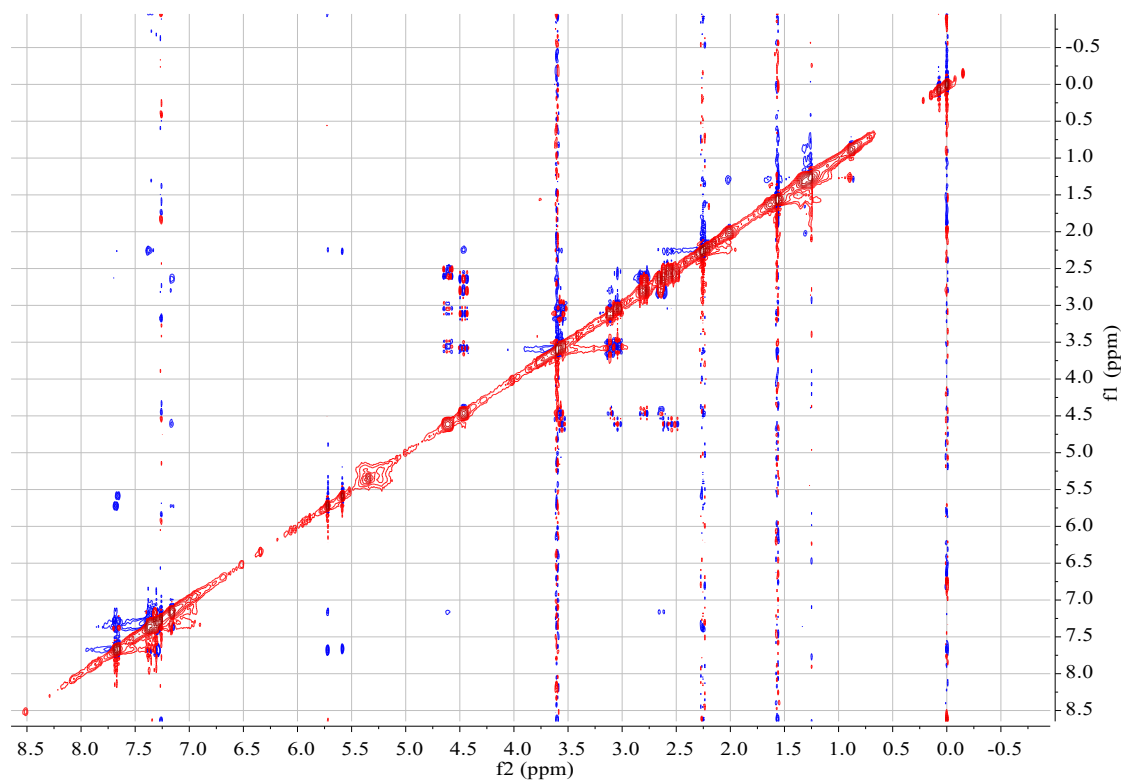

Figure S42. 5aa ( $^1\text{H}$  NMR, NOESY, 400 MHz,  $\text{CDCl}_3$ )

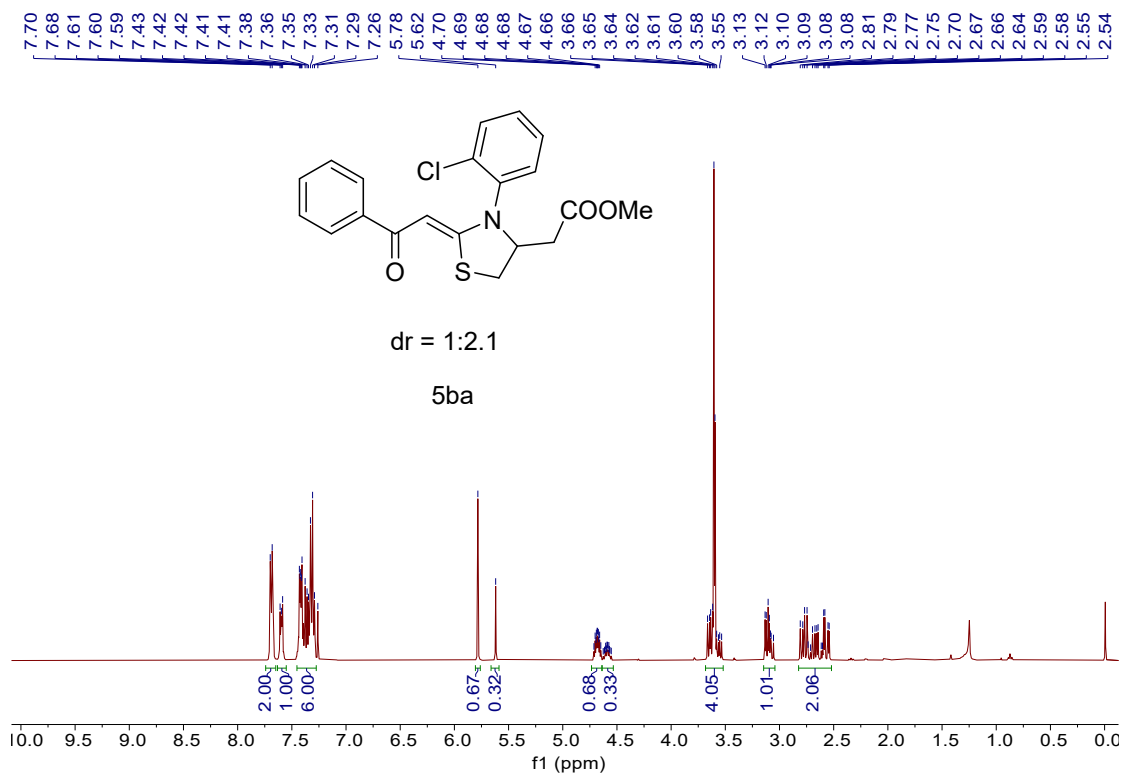

Figure S43. 5ba ( $^1\text{H}$  NMR, 400 MHz,  $\text{CDCl}_3$ )

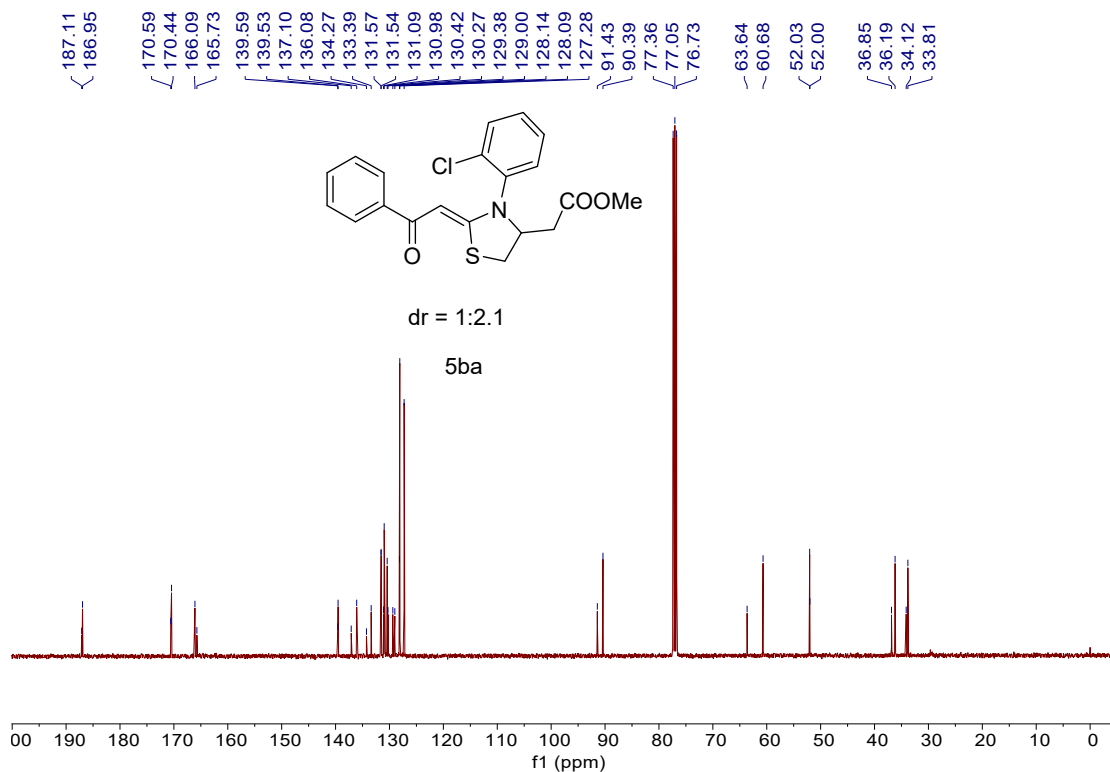

Figure S44. 5ba ( $^{13}\text{C}$  NMR, 100 MHz,  $\text{CDCl}_3$ )

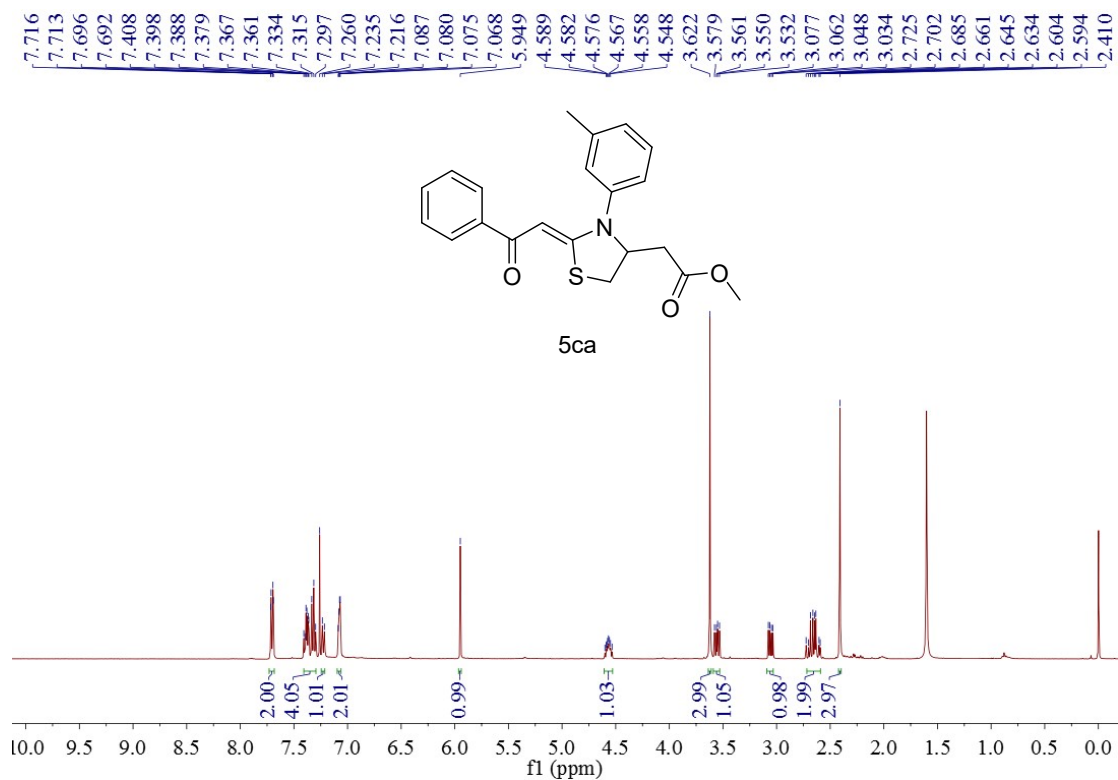

Figure S45. 5ca (<sup>1</sup>H NMR, 400 MHz, CDCl<sub>3</sub>)

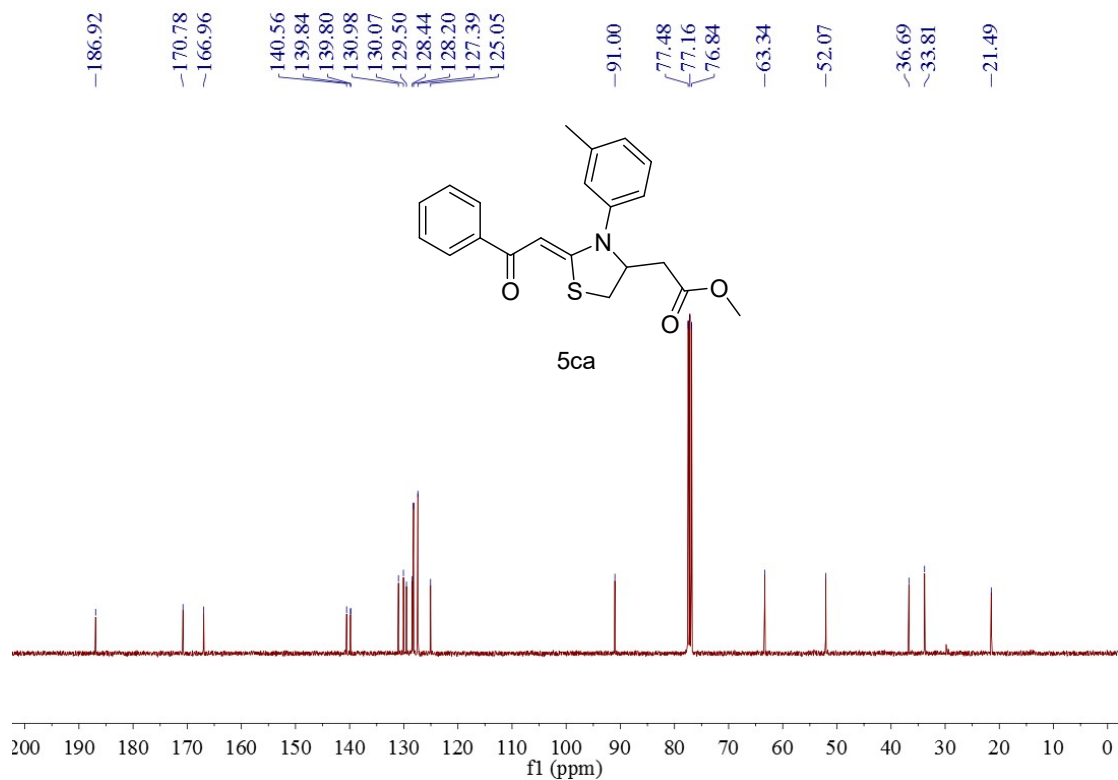

Figure S46. 5ca (<sup>13</sup>C NMR, 100 MHz, CDCl<sub>3</sub>)



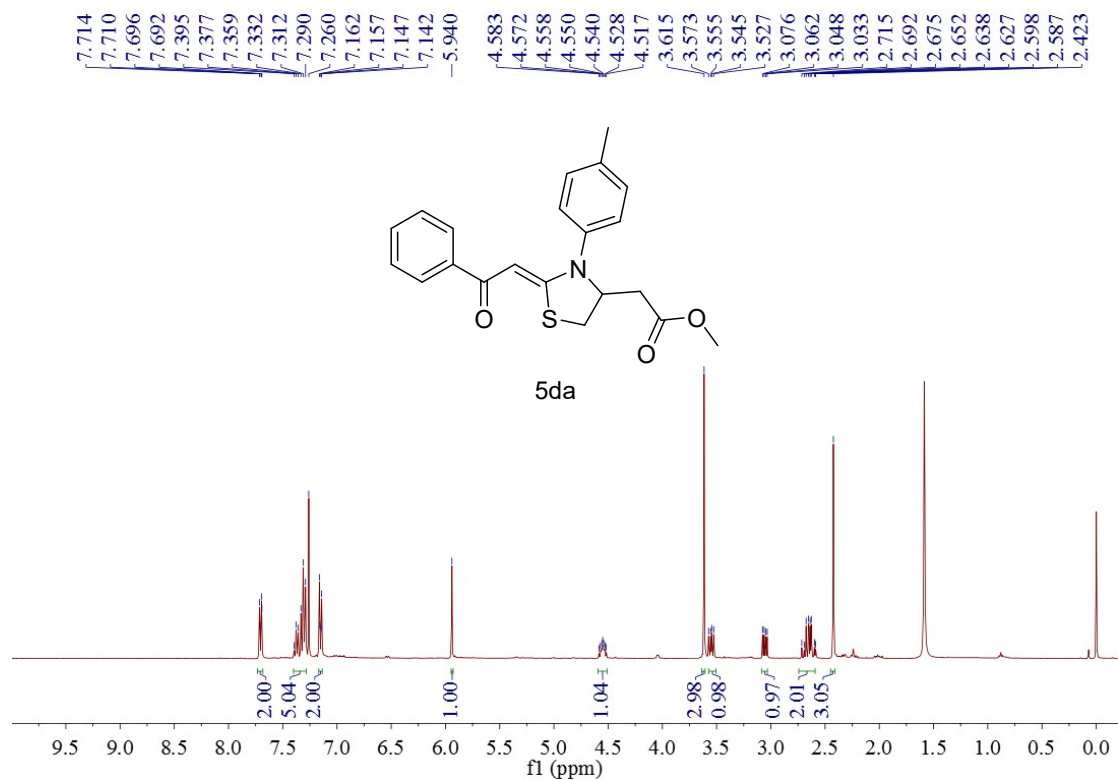

Figure S47. 5da ( $^1\text{H}$  NMR, 400 MHz,  $\text{CDCl}_3$ )

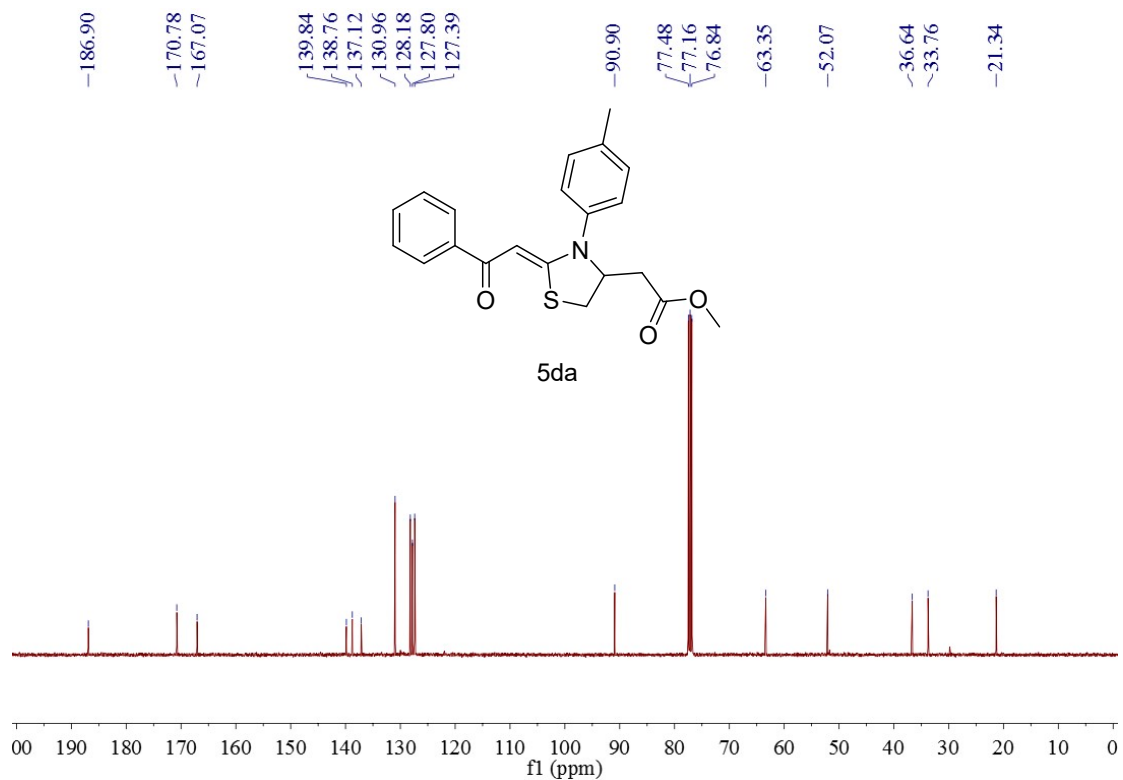

Figure S48. 5da ( $^{13}\text{C}$  NMR, 100 MHz,  $\text{CDCl}_3$ )

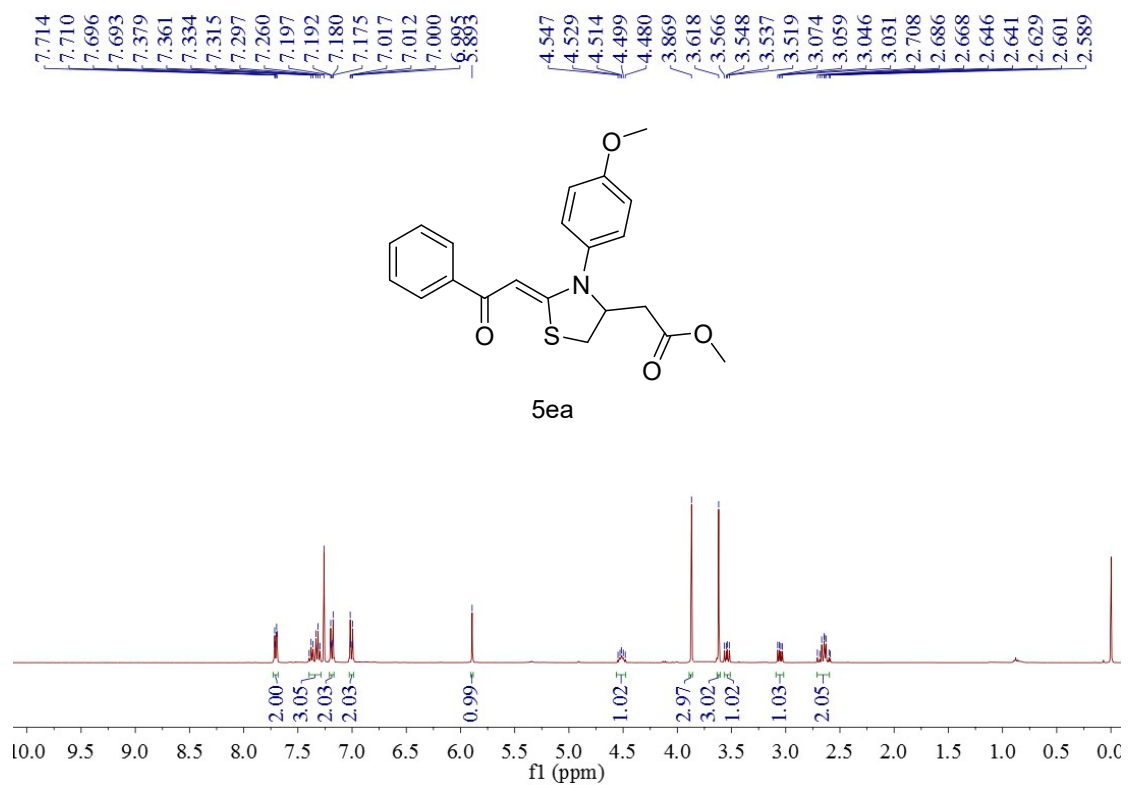

Figure S49. **5ea** ( $^1\text{H}$  NMR, 400 MHz,  $\text{CDCl}_3$ )

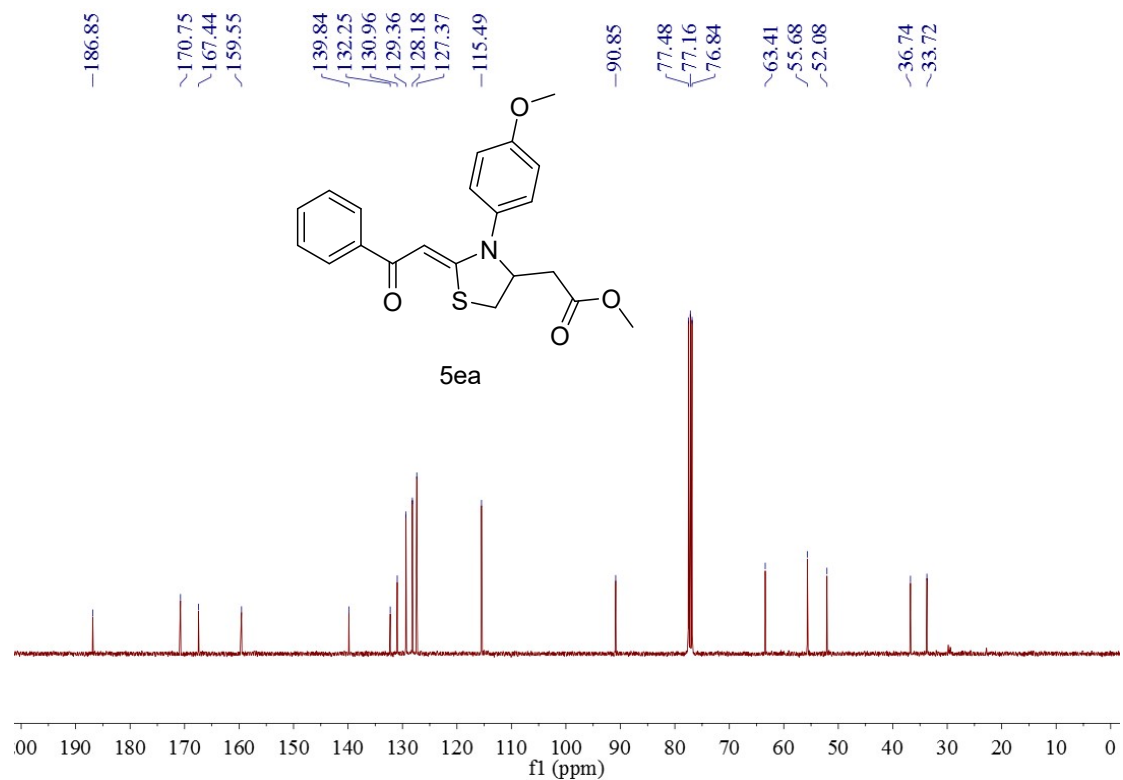

Figure S50. **5ea** ( $^{13}\text{C}$  NMR, 100 MHz,  $\text{CDCl}_3$ )

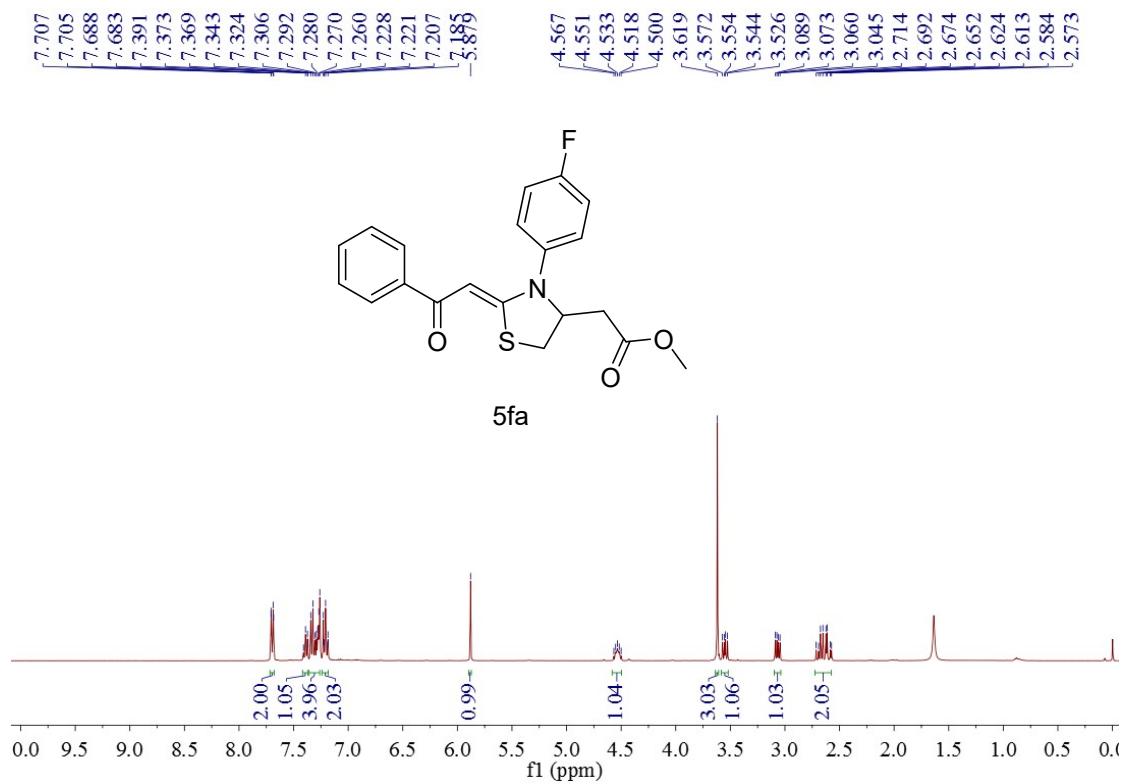

**Figure S51. 5fa** (<sup>1</sup>H NMR, 400 MHz, CDCl<sub>3</sub>)

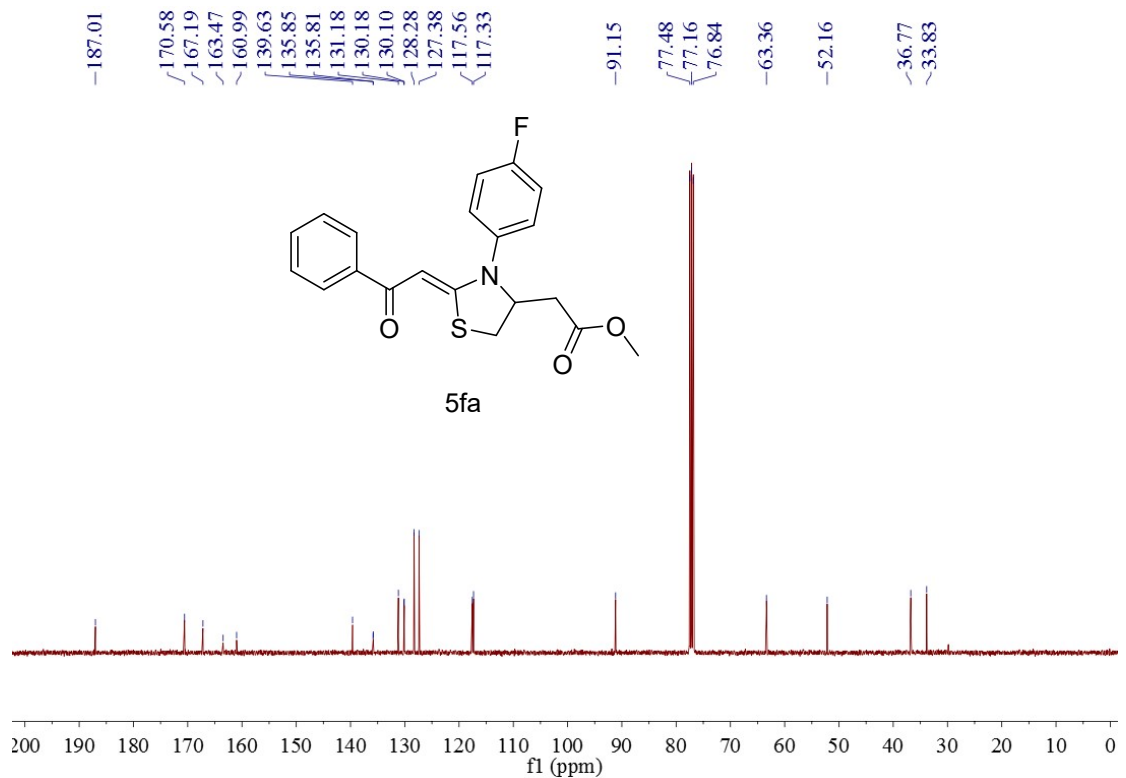

**Figure S52. 5fa** (<sup>13</sup>C NMR, 100 MHz, CDCl<sub>3</sub>)

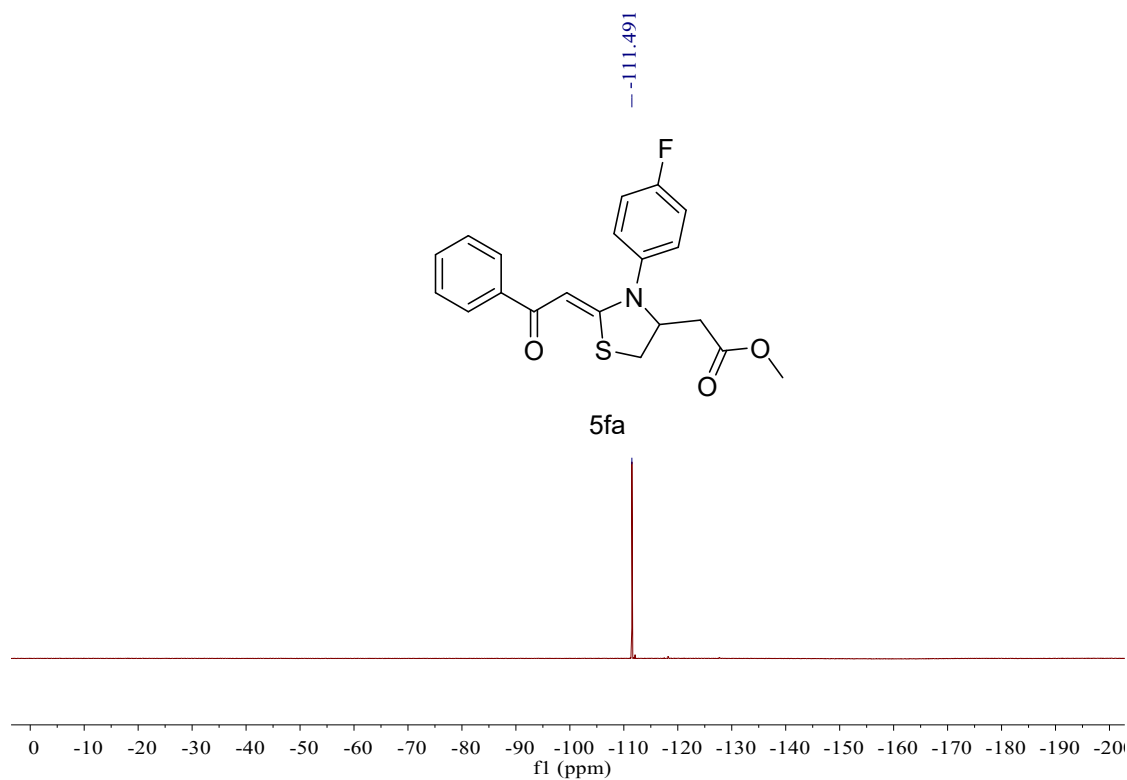

**Figure S53. 5fa** ( $^{19}\text{F}$  NMR, 376 MHz,  $\text{CDCl}_3$ )

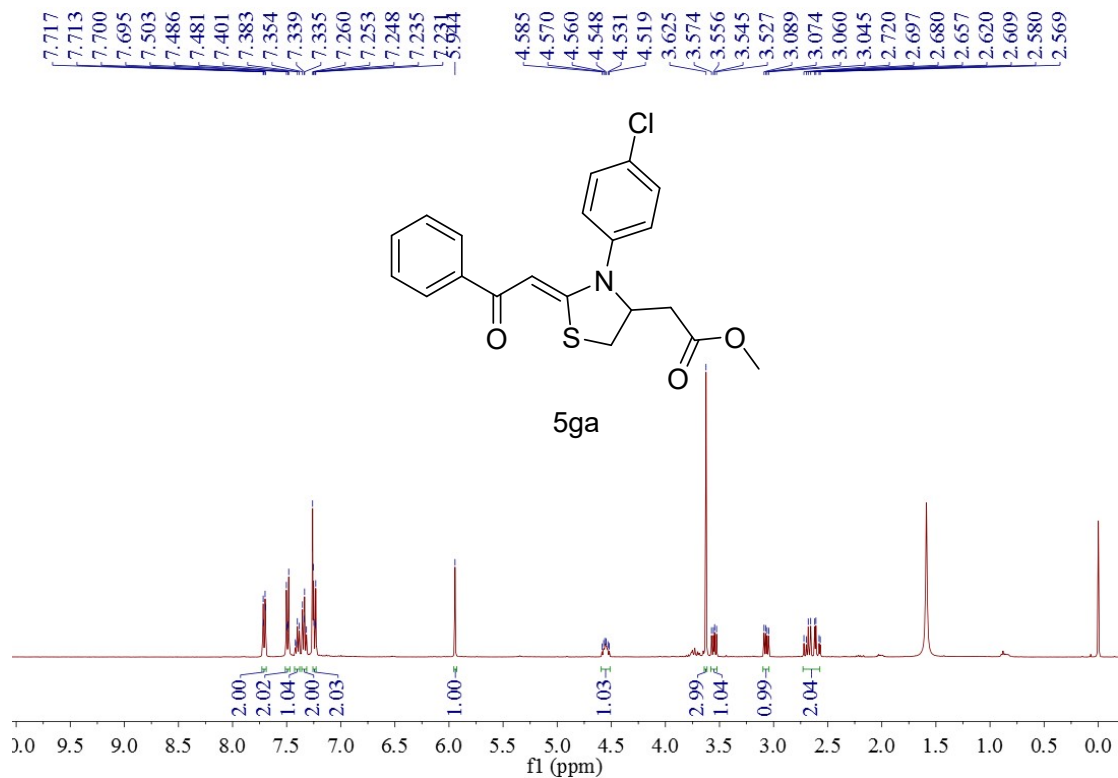

**Figure S54. 5ga** ( $^1\text{H}$  NMR, 400 MHz,  $\text{CDCl}_3$ )

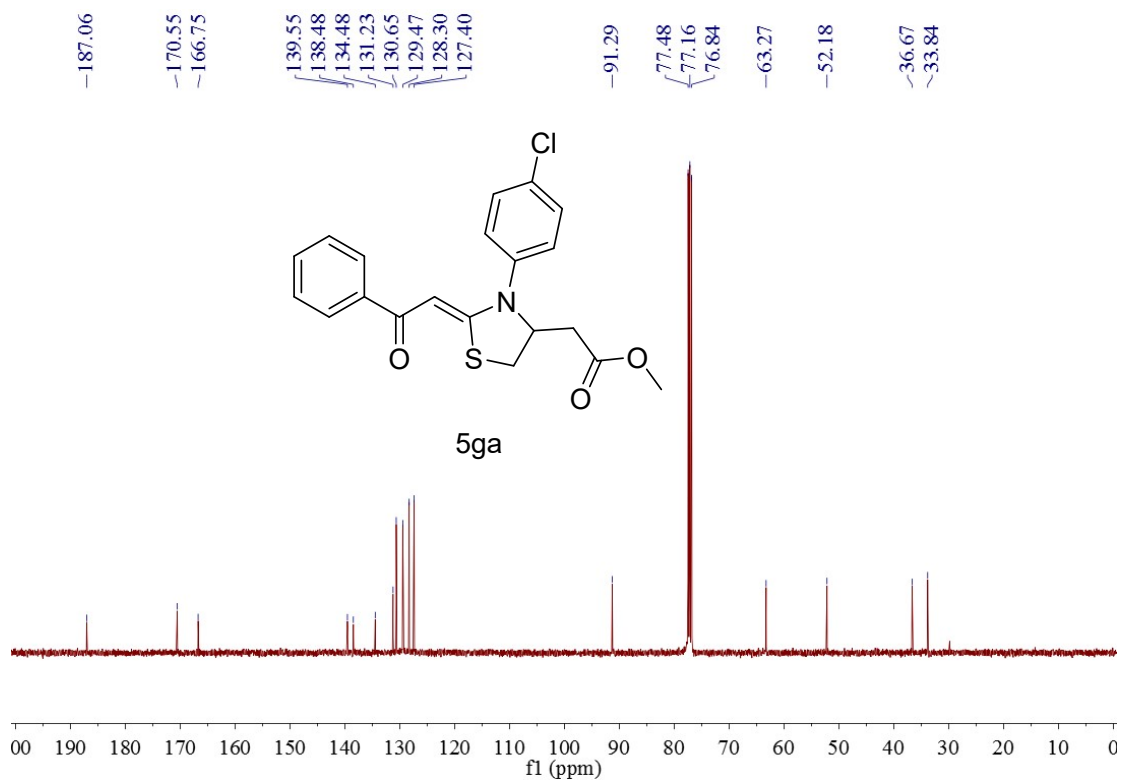

Figure S55. **5ga** ( $^{13}\text{C}$  NMR, 100 MHz,  $\text{CDCl}_3$ )

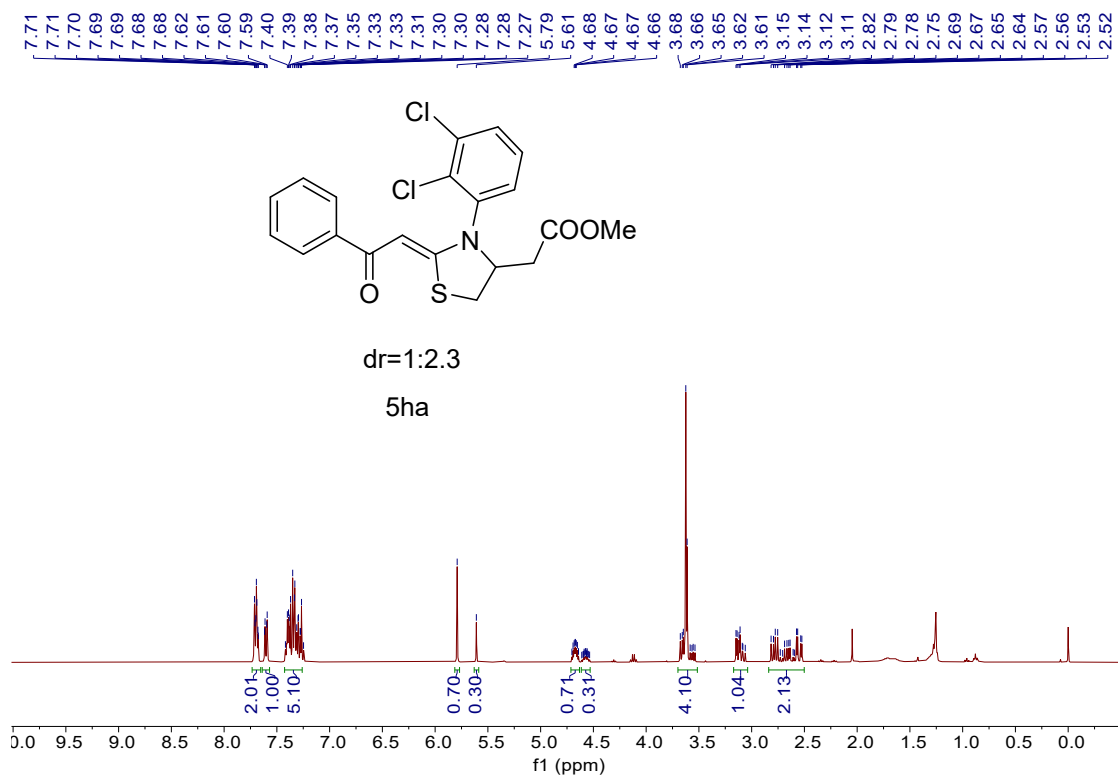

Figure S56. **5ha** ( $^1\text{H}$  NMR, 400 MHz,  $\text{CDCl}_3$ )

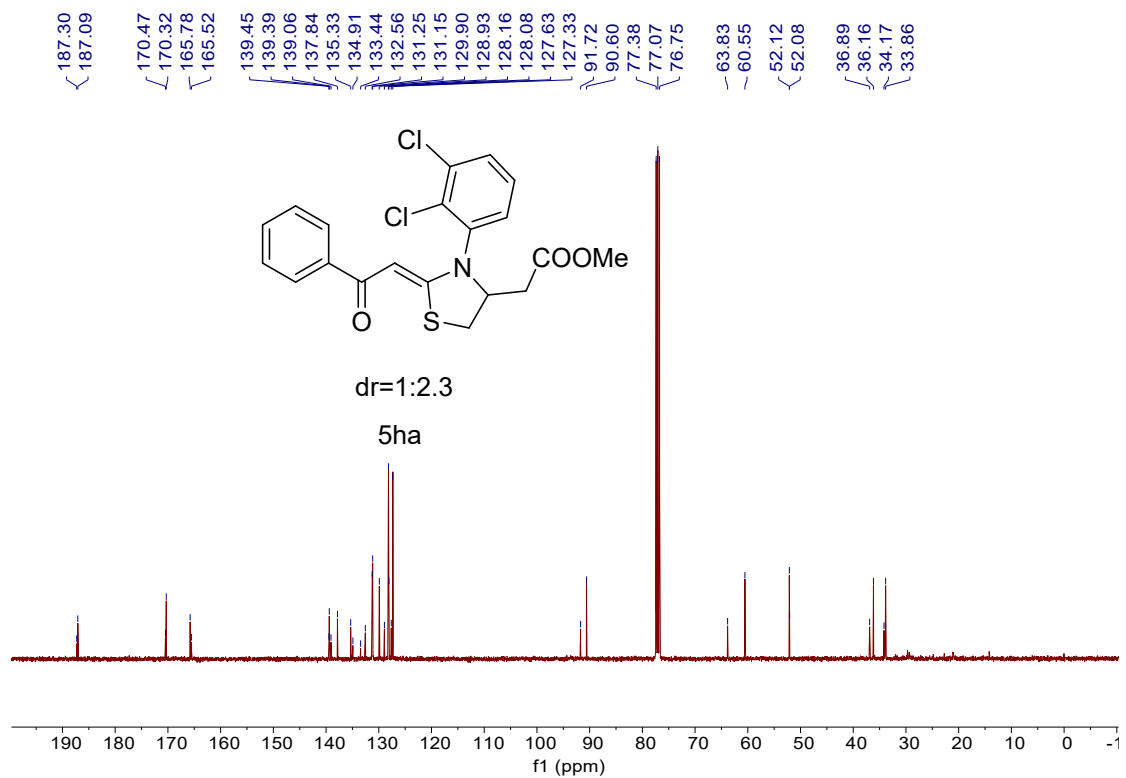

Figure S57. 5ha ( $^{13}\text{C}$  NMR, 100 MHz,  $\text{CDCl}_3$ )

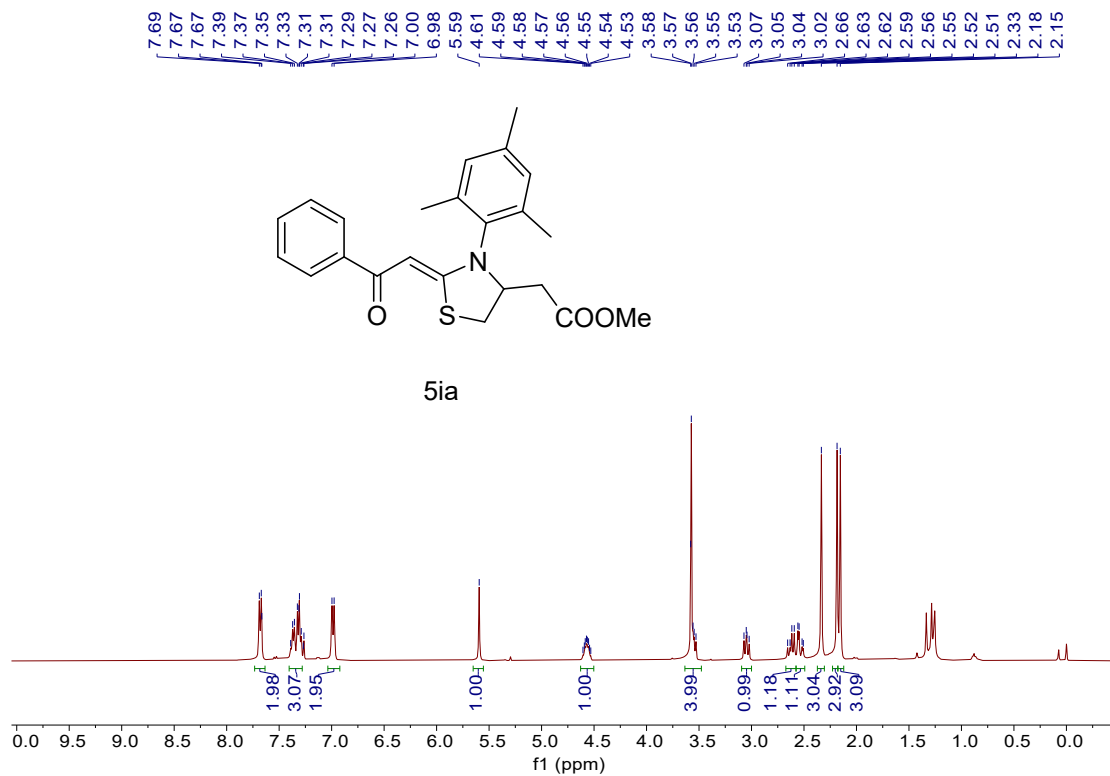

Figure S58. 5ia ( $^1\text{H}$  NMR, 400 MHz,  $\text{CDCl}_3$ )

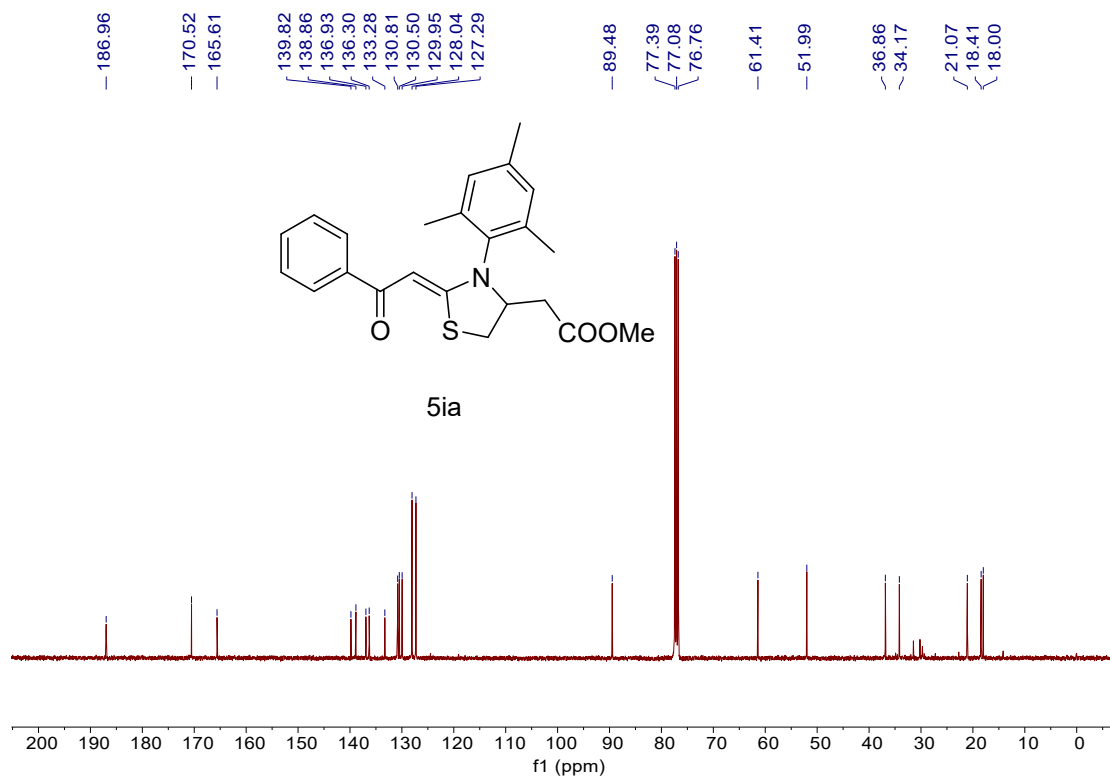

Figure S59. 5ia (<sup>13</sup>C NMR, 100 MHz, CDCl<sub>3</sub>)

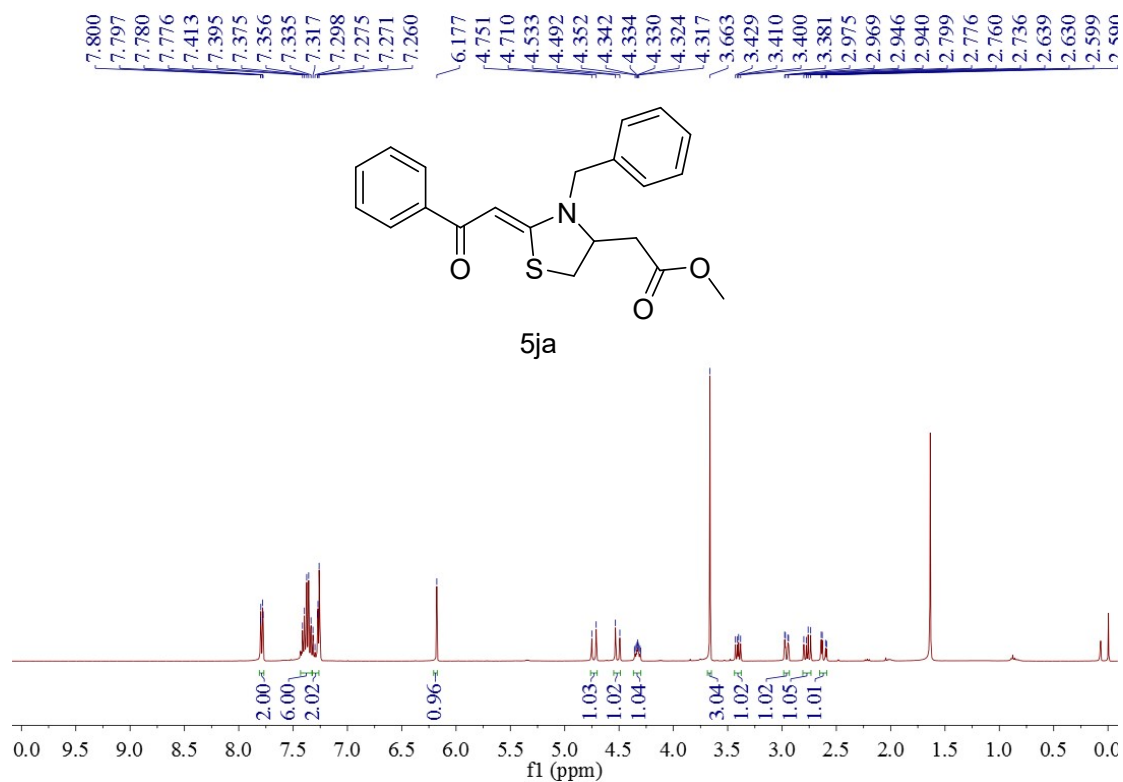

Figure S60. 5ja (<sup>1</sup>H NMR, 400 MHz, CDCl<sub>3</sub>)

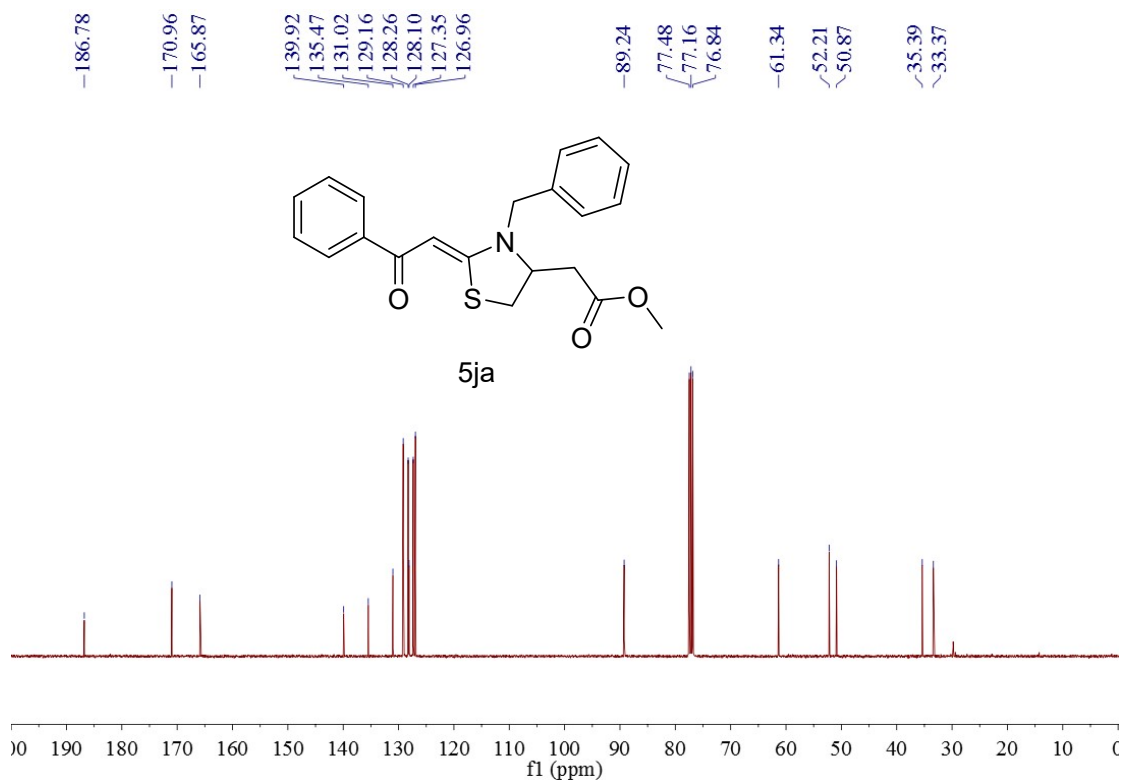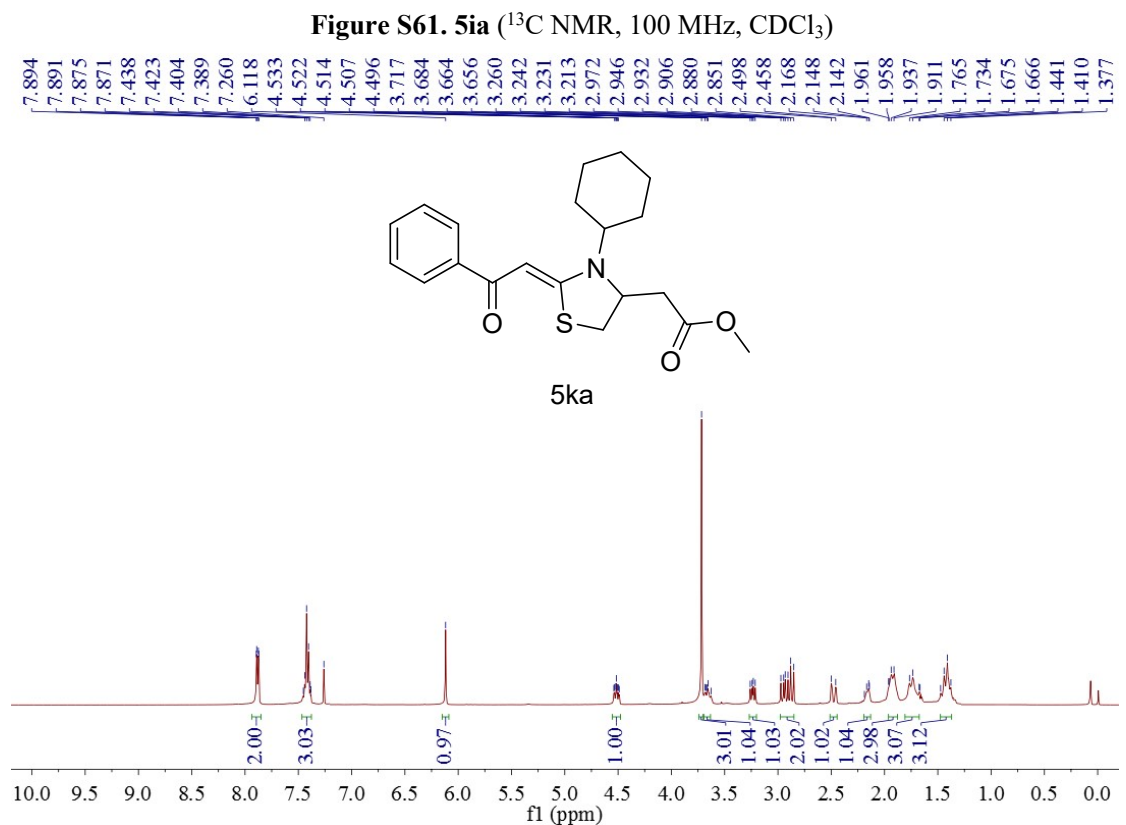

**Figure S62. 5ka** ( $^1\text{H}$  NMR, 400 MHz,  $\text{CDCl}_3$ )



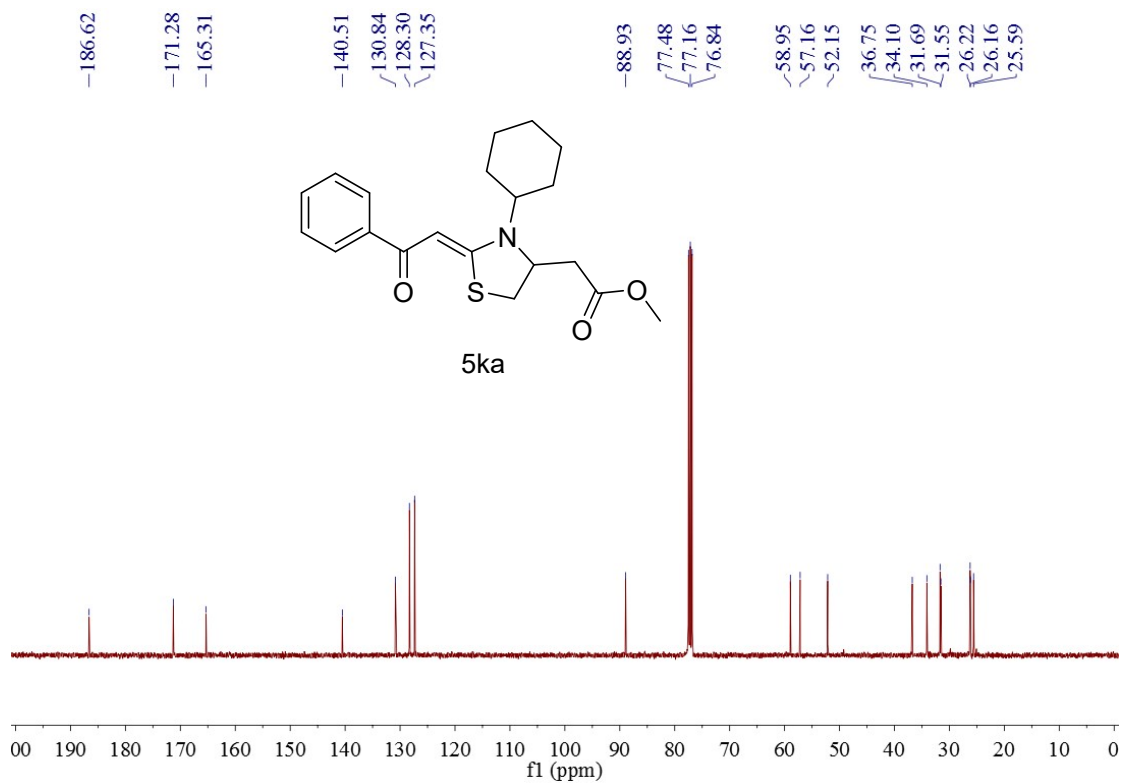

Figure S63. **5ka** ( $^{13}\text{C}$  NMR, 100 MHz,  $\text{CDCl}_3$ )

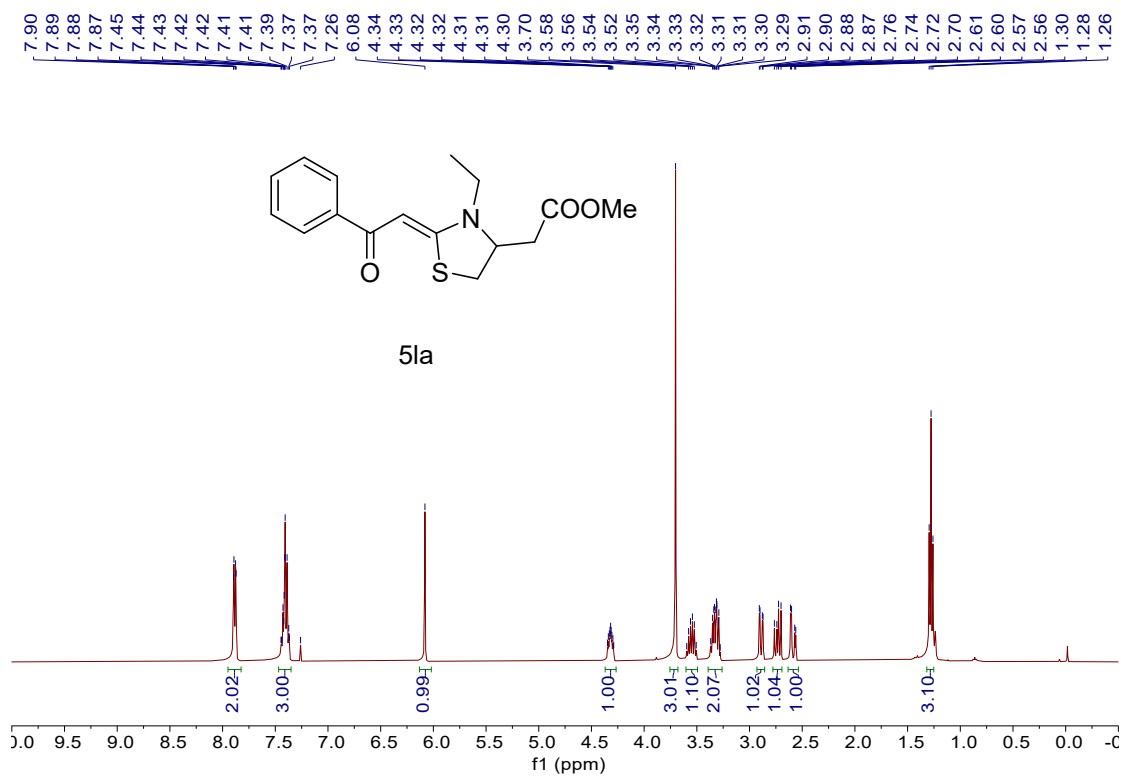

Figure S64. **5la** ( $^1\text{H}$  NMR, 400 MHz,  $\text{CDCl}_3$ )

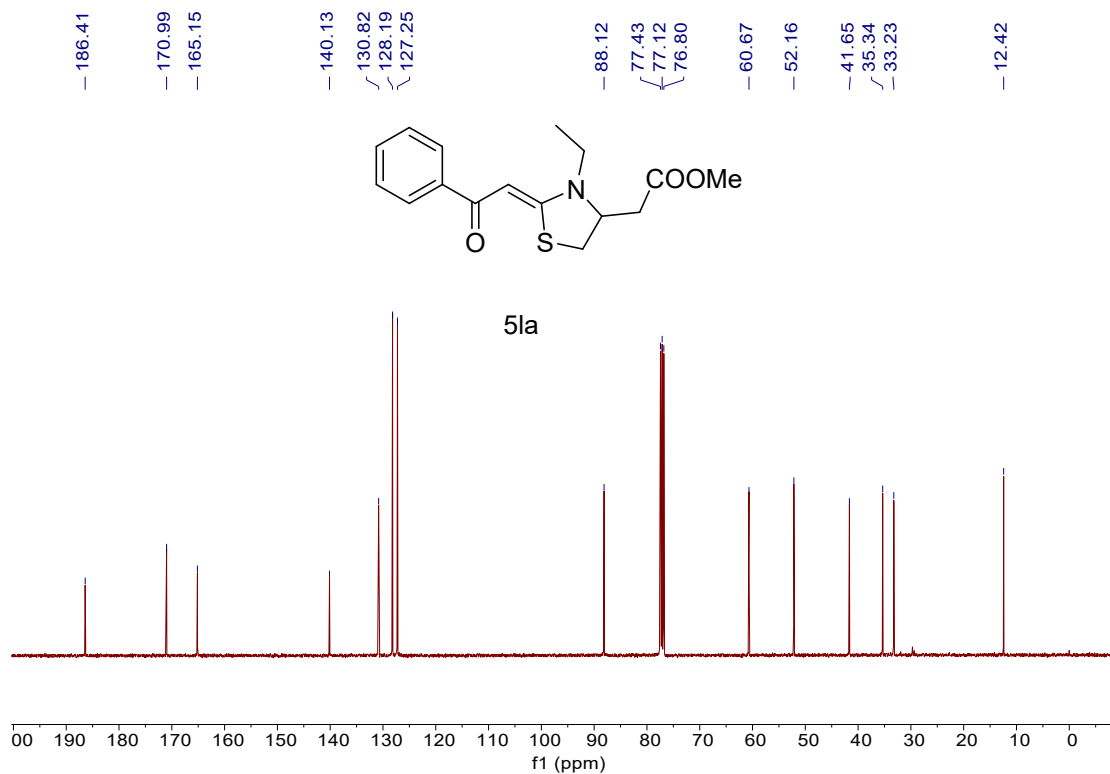

**Figure S65. 5la** ( $^{13}\text{C}$  NMR, 100 MHz,  $\text{CDCl}_3$ )

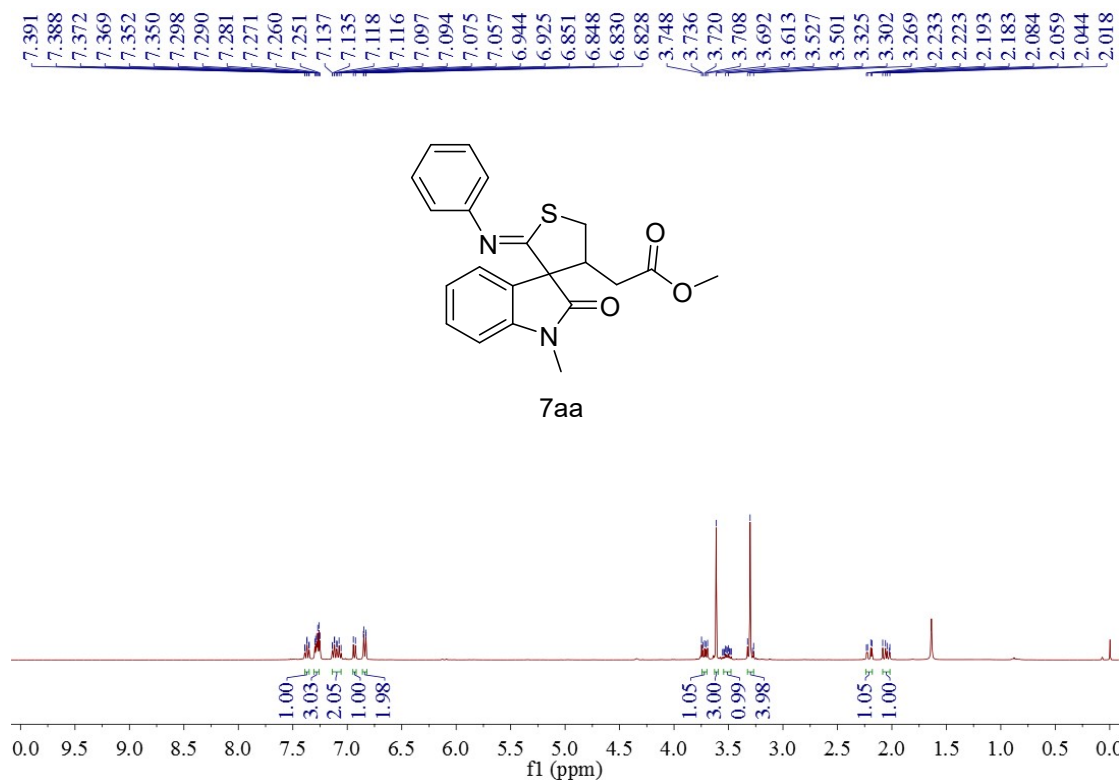

**Figure S66. 7aa** ( $^1\text{H}$  NMR, 400 MHz,  $\text{CDCl}_3$ )

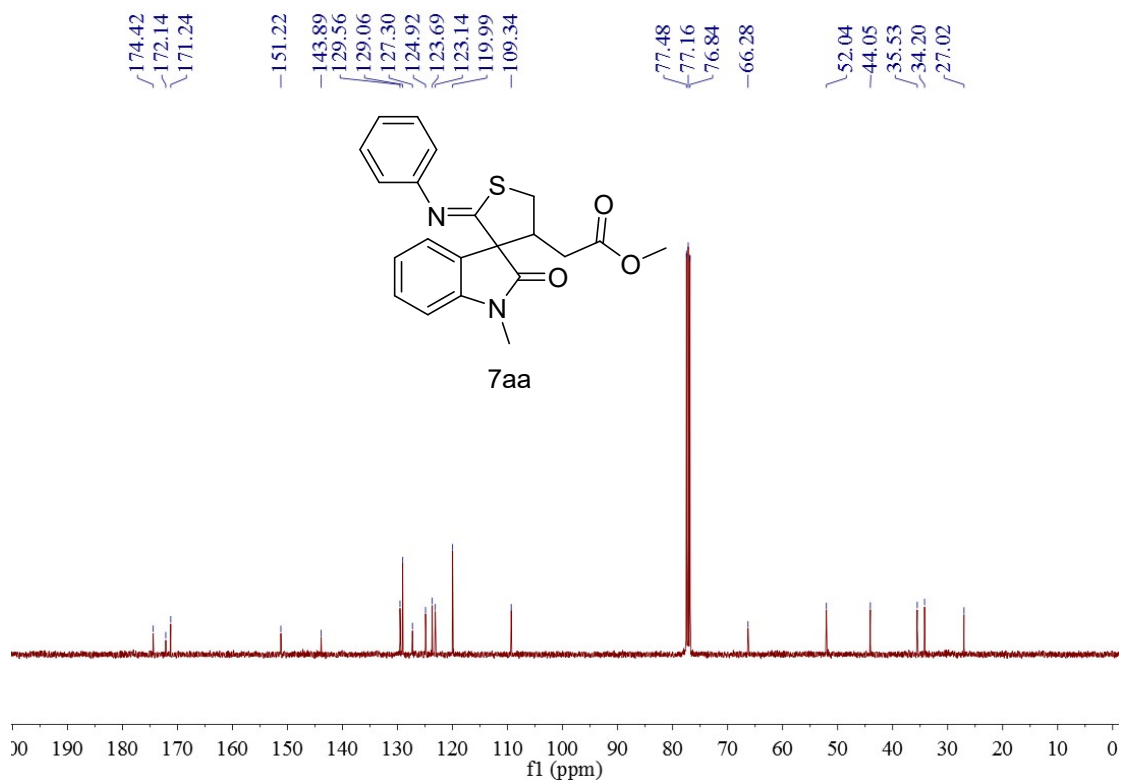

Figure S67. 7aa ( $^{13}\text{C}$  NMR, 100 MHz,  $\text{CDCl}_3$ )

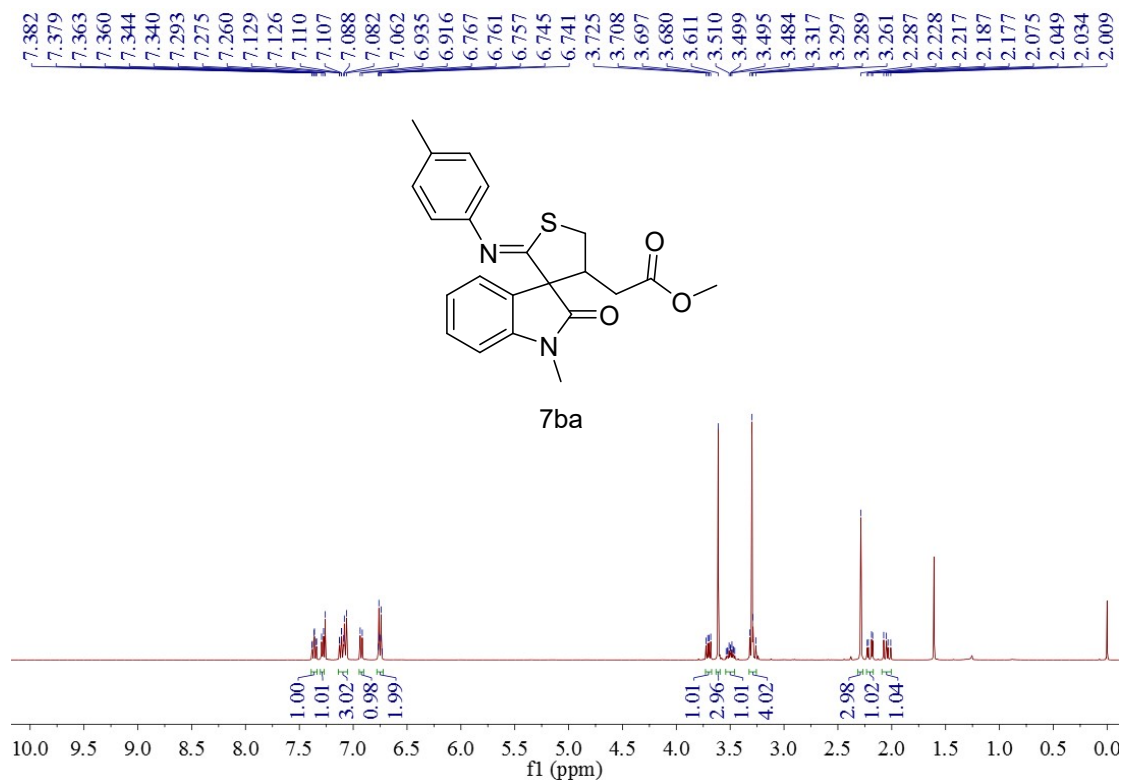

Figure S68. 7ba ( $^1\text{H}$  NMR, 400 MHz,  $\text{CDCl}_3$ )

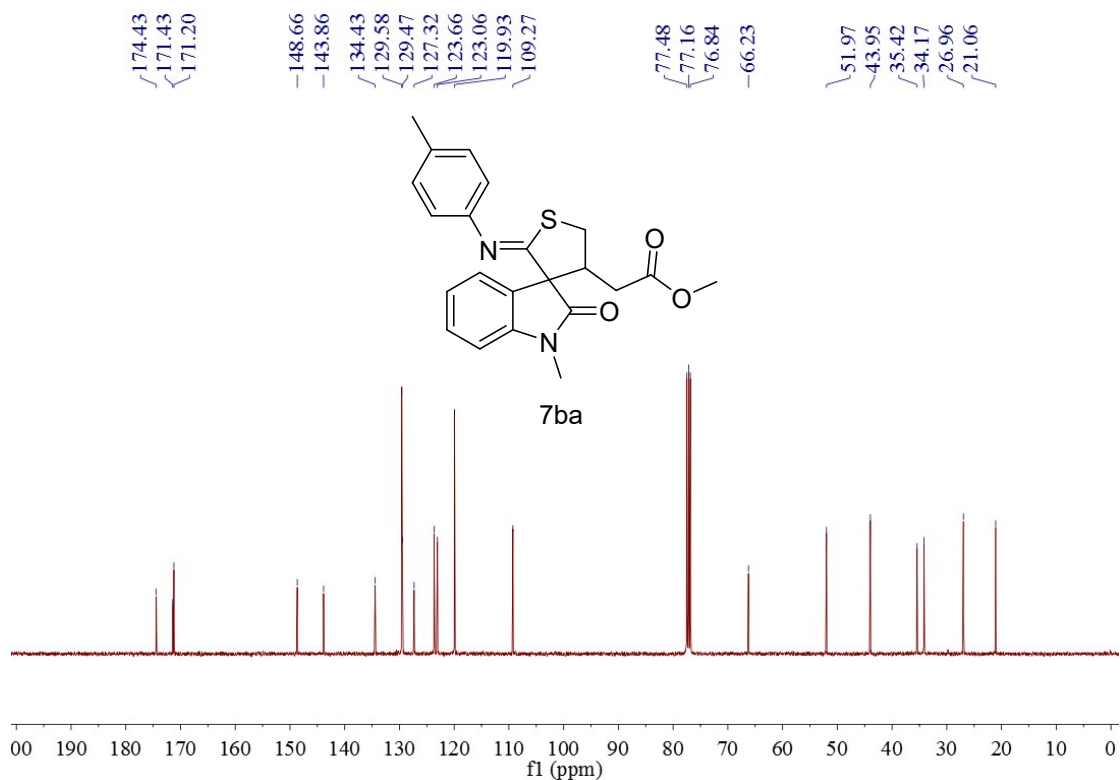

Figure S69. 7ba (<sup>13</sup>C NMR, 100 MHz, CDCl<sub>3</sub>)

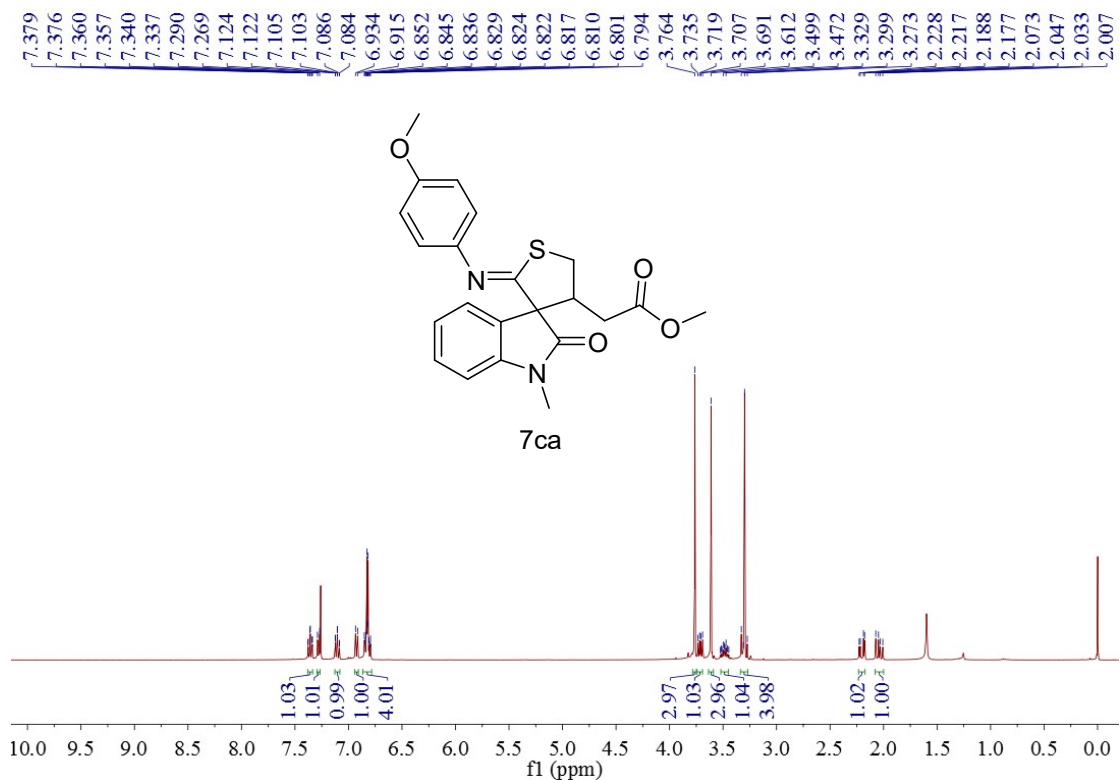

Figure S70. 7ca (<sup>1</sup>H NMR, 400 MHz, CDCl<sub>3</sub>)

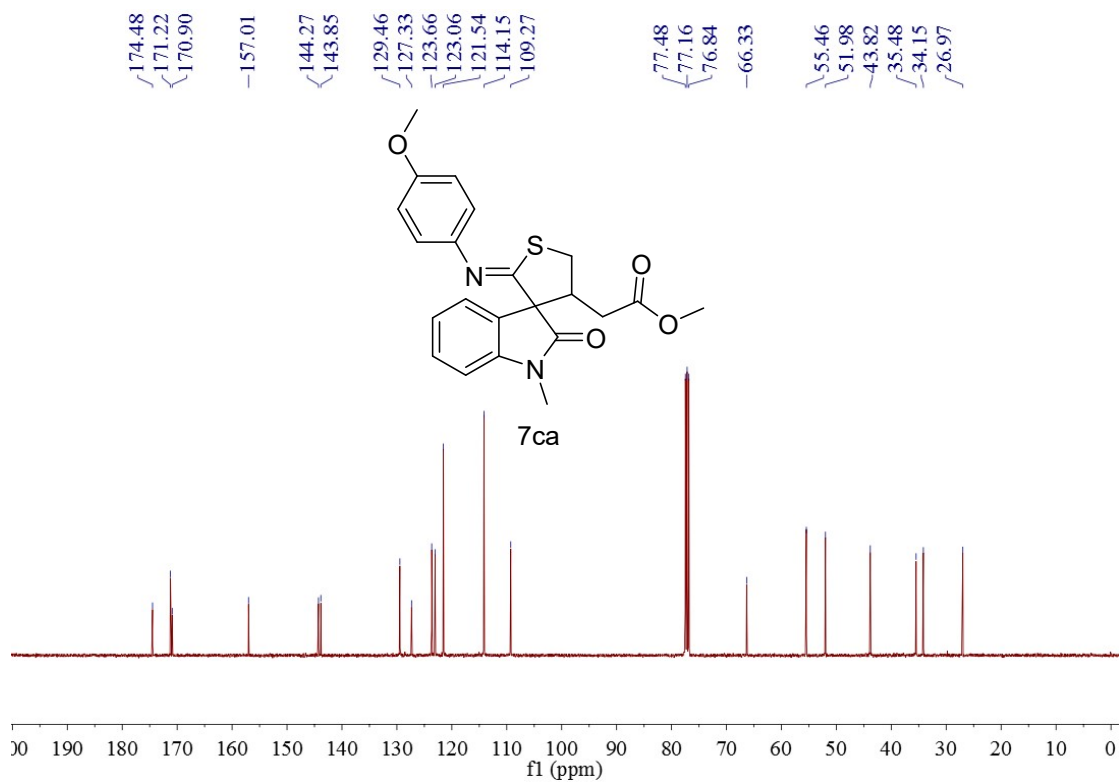

Figure S71. 7ca (<sup>13</sup>C NMR, 100 MHz, CDCl<sub>3</sub>)

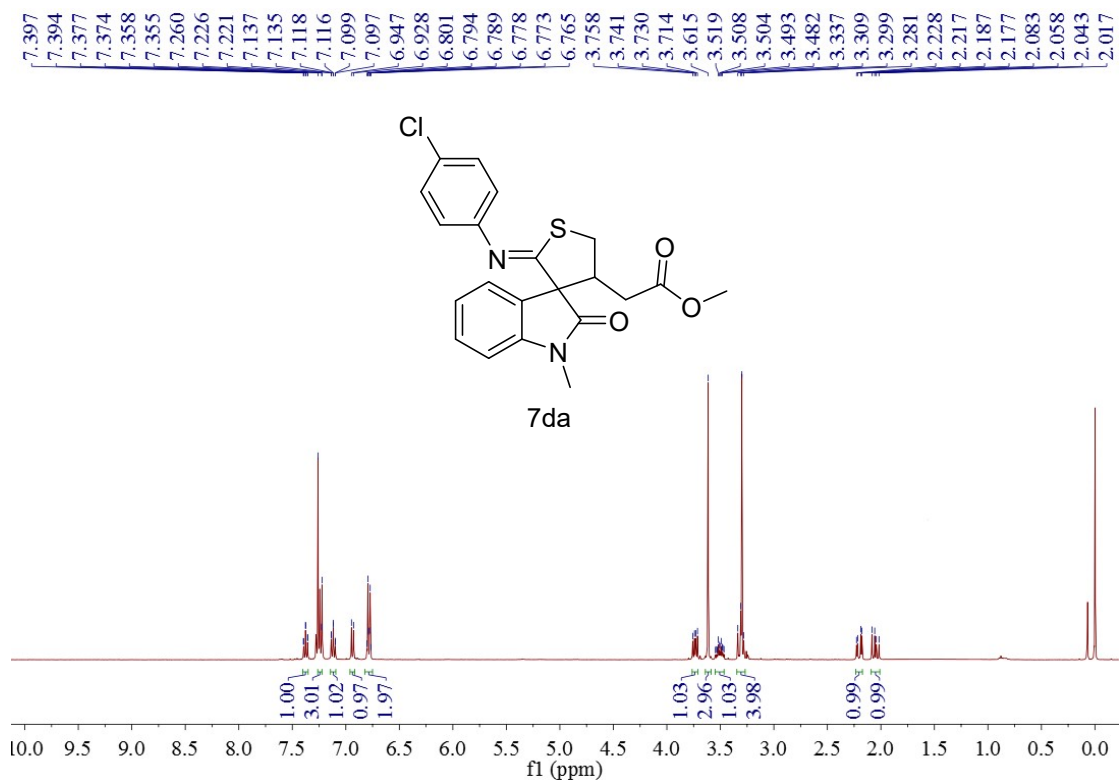

Figure S72. 7da (<sup>1</sup>H NMR, 400 MHz, CDCl<sub>3</sub>)

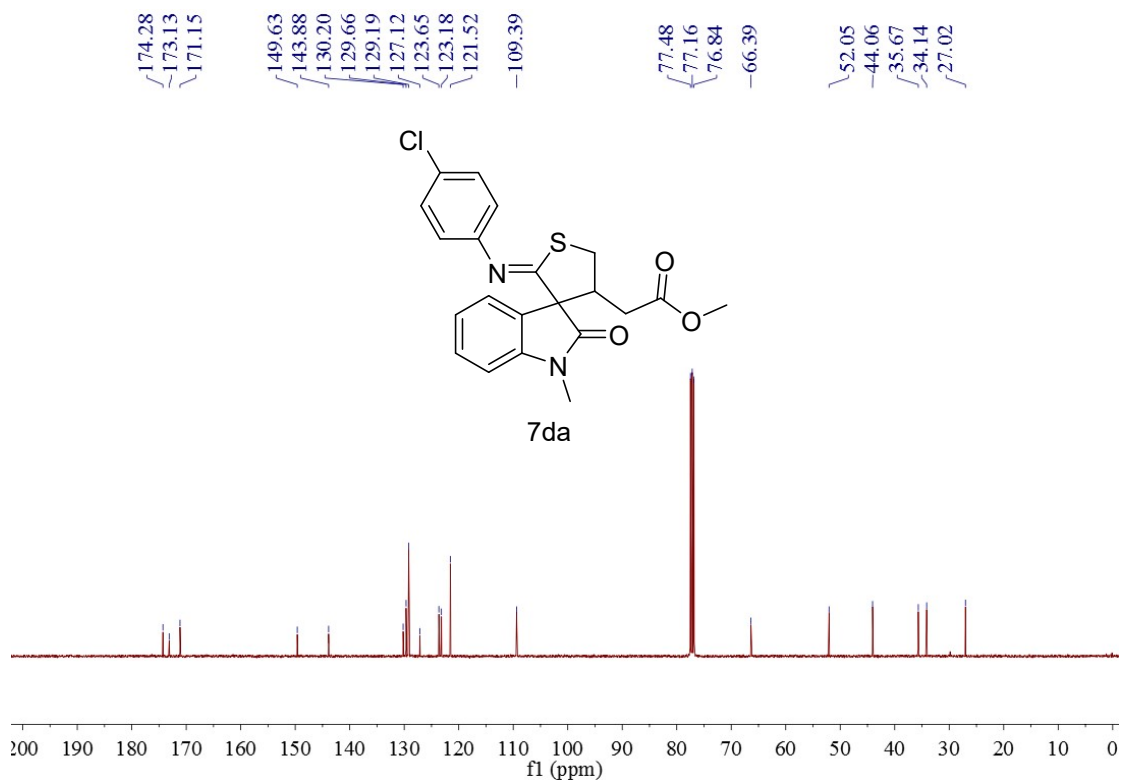

**Figure S73. 7da (<sup>13</sup>C NMR, 100 MHz, CDCl<sub>3</sub>)**

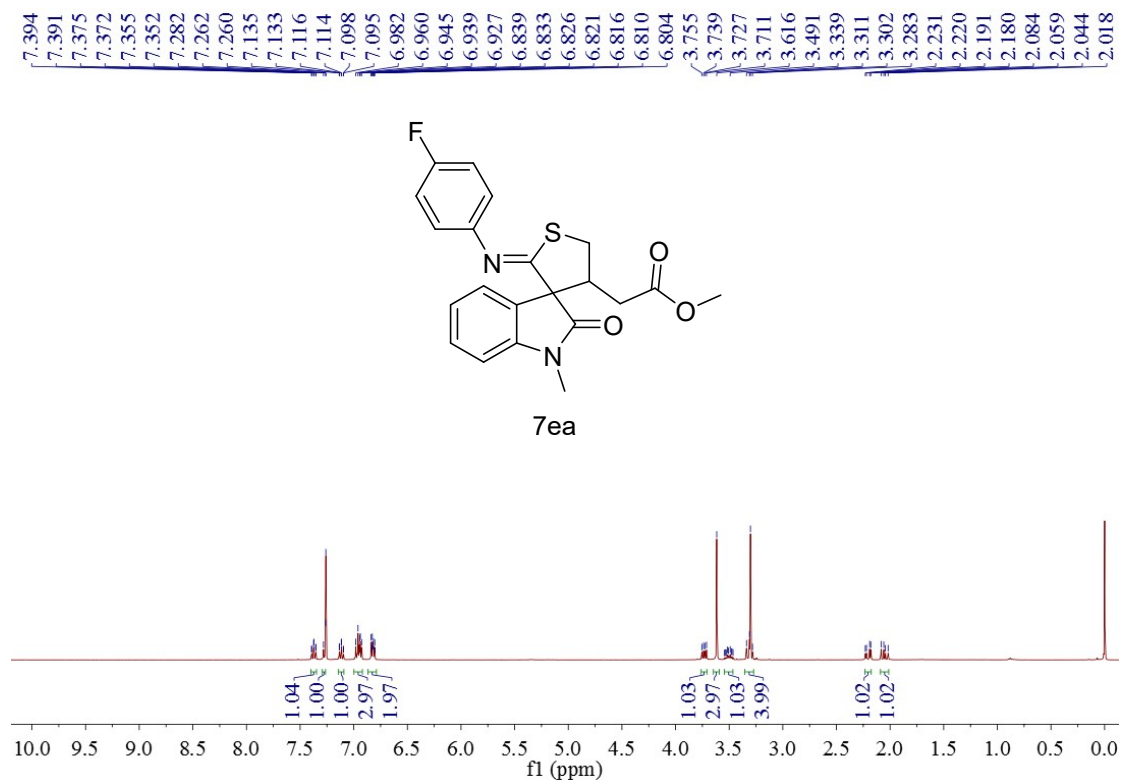

**Figure S74. 7ea (<sup>1</sup>H NMR, 400 MHz, CDCl<sub>3</sub>)**

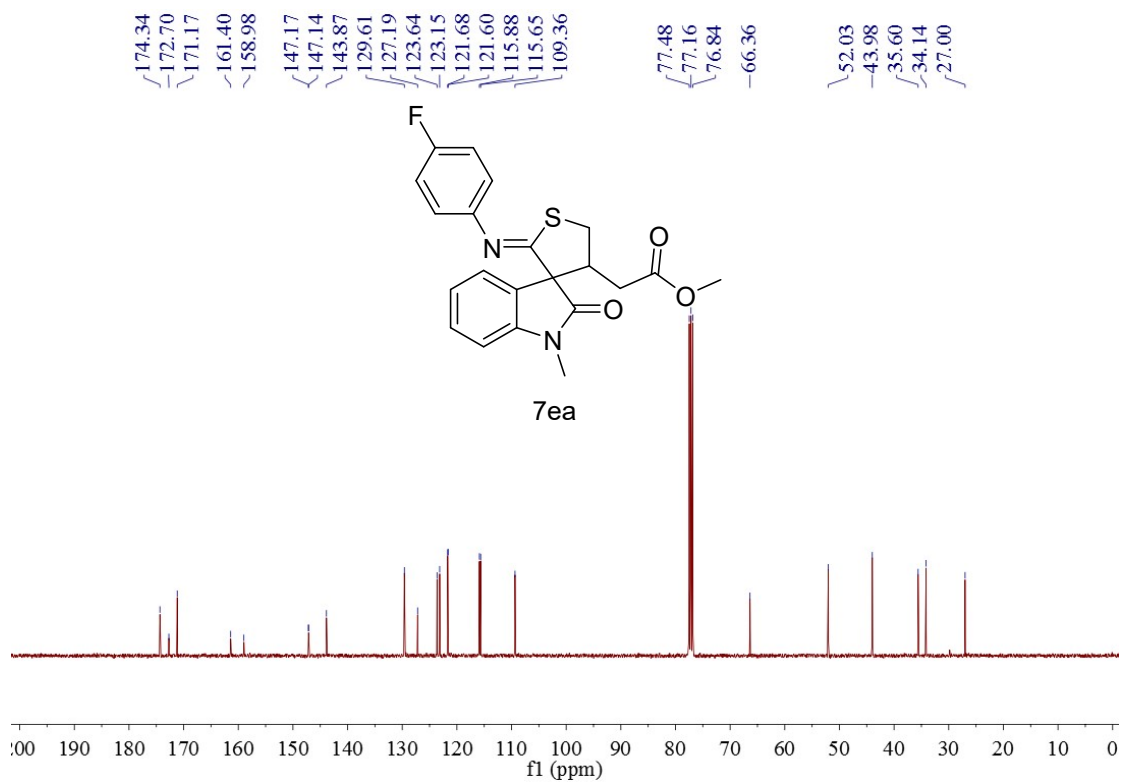

Figure S75. 7ea ( $^{13}\text{C}$  NMR, 100 MHz,  $\text{CDCl}_3$ )

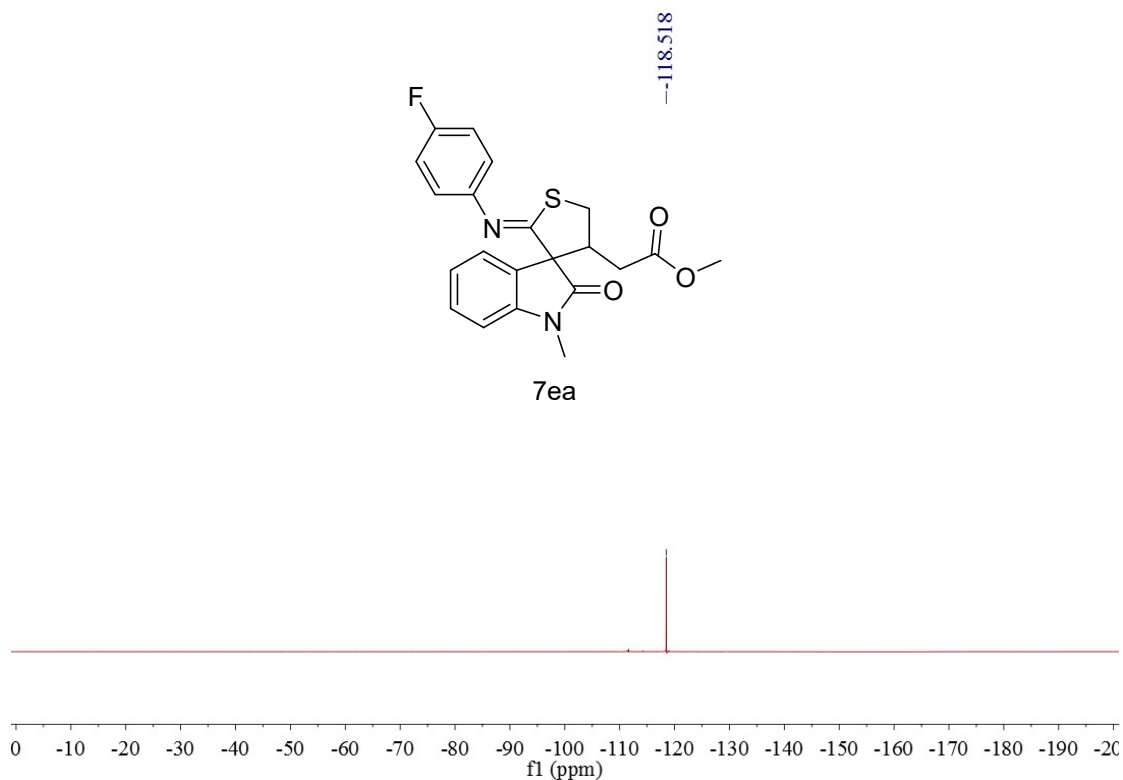

Figure S76. 7ea ( $^{19}\text{F}$  NMR, 376 MHz,  $\text{CDCl}_3$ )

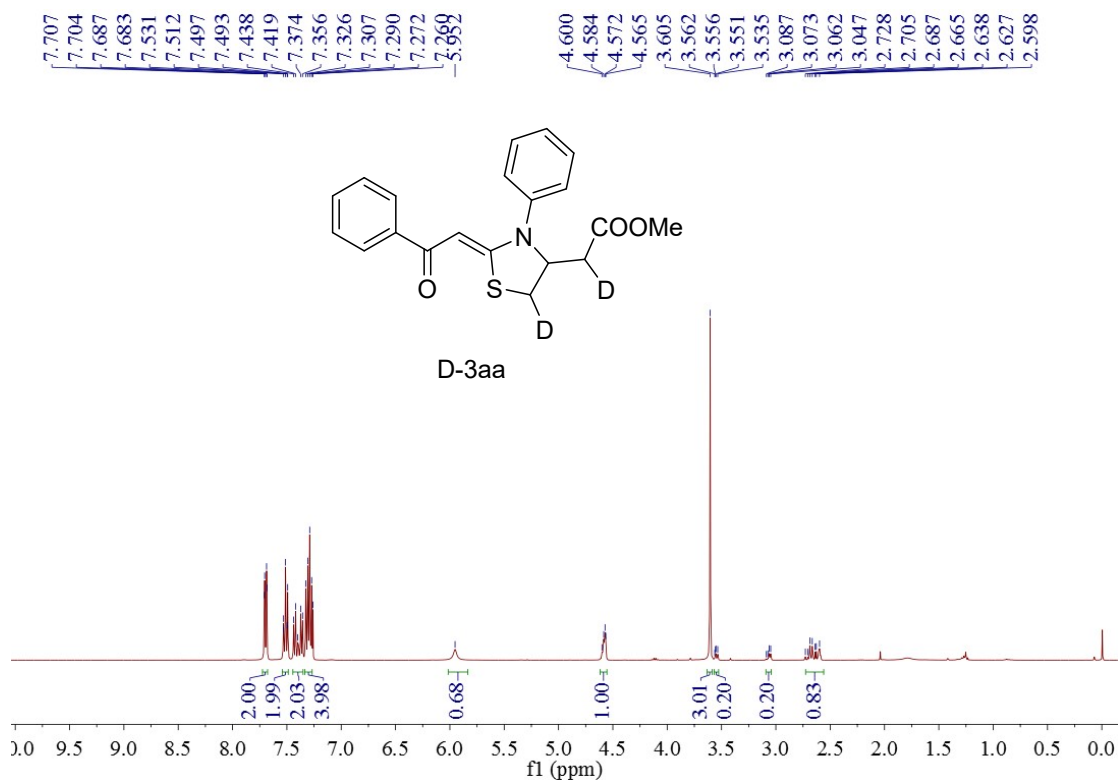

Figure S77. D-3aa ( $^1\text{H}$  NMR, 400 MHz,  $\text{CDCl}_3$ )

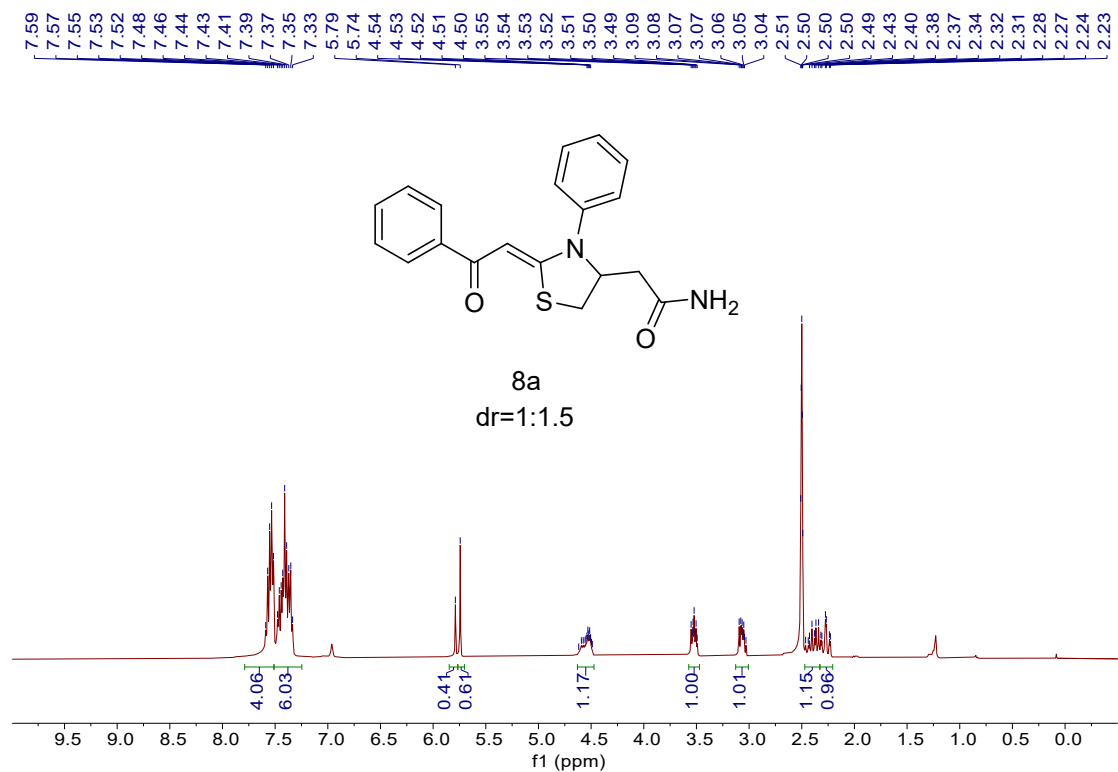

Figure S78. 8a ( $^1\text{H}$  NMR, 400 MHz,  $\text{DMSO-d}_6$ )



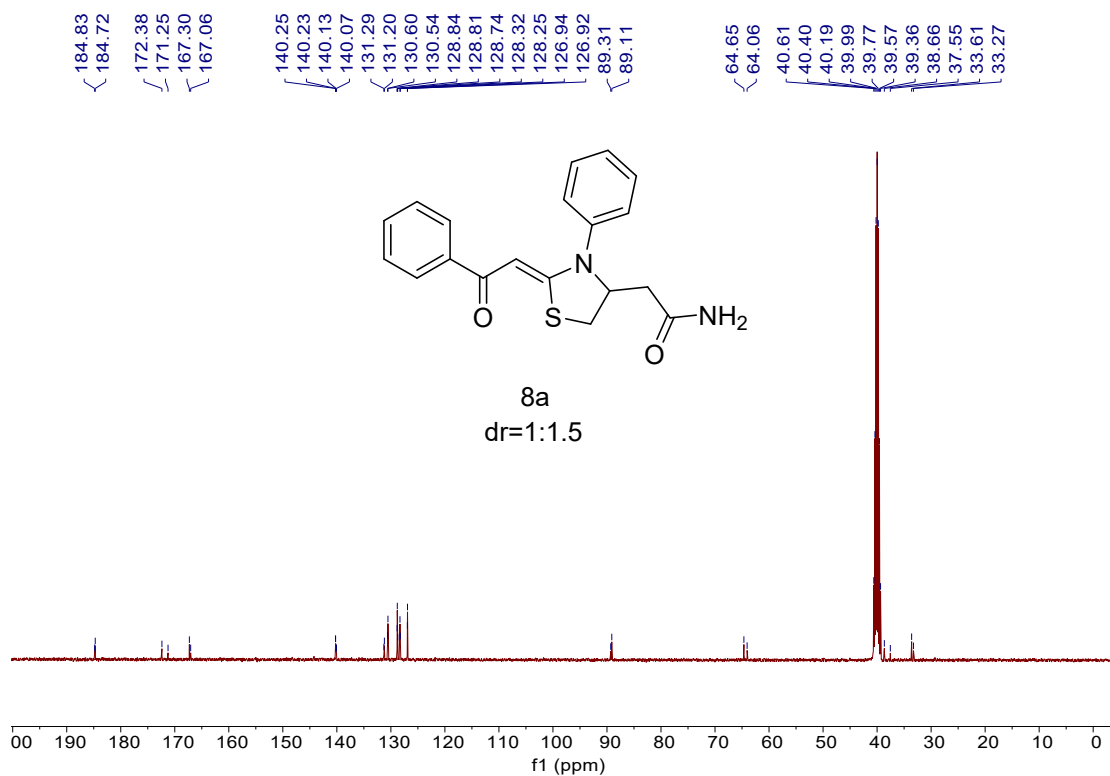

Figure S79. 8a ( $^{13}\text{C}$  NMR, 100 MHz,  $\text{DMSO-d}_6$ )

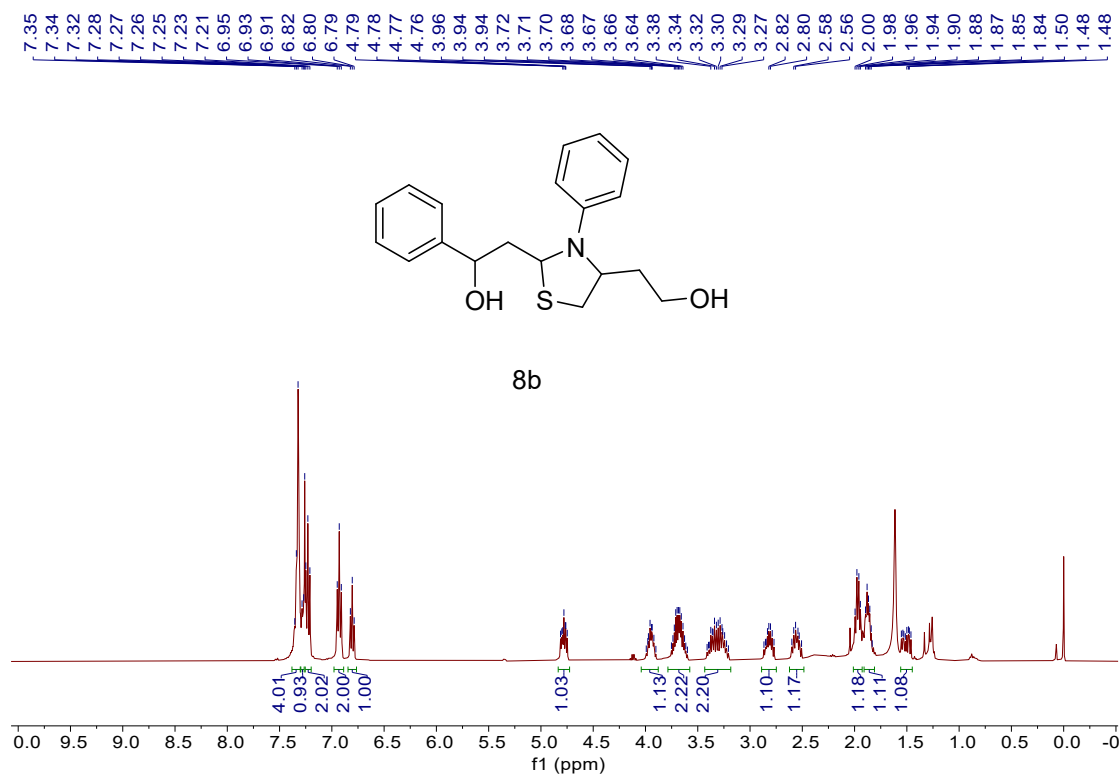

Figure S80. 8b ( $^1\text{H}$  NMR, 400 MHz,  $\text{CDCl}_3$ )

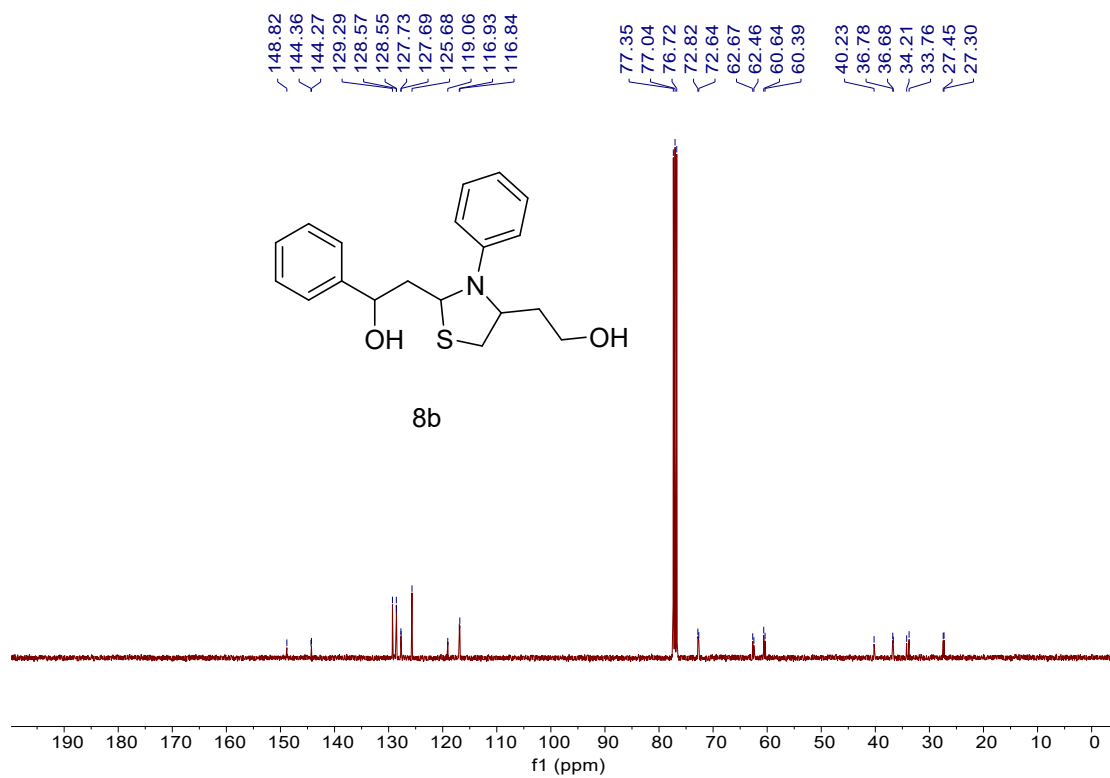

Figure S81. 8b ( $^{13}\text{C}$  NMR, 100 MHz,  $\text{CDCl}_3$ )

## 2. X-raycrystal structure

### X-raycrystal structure of **3aa**

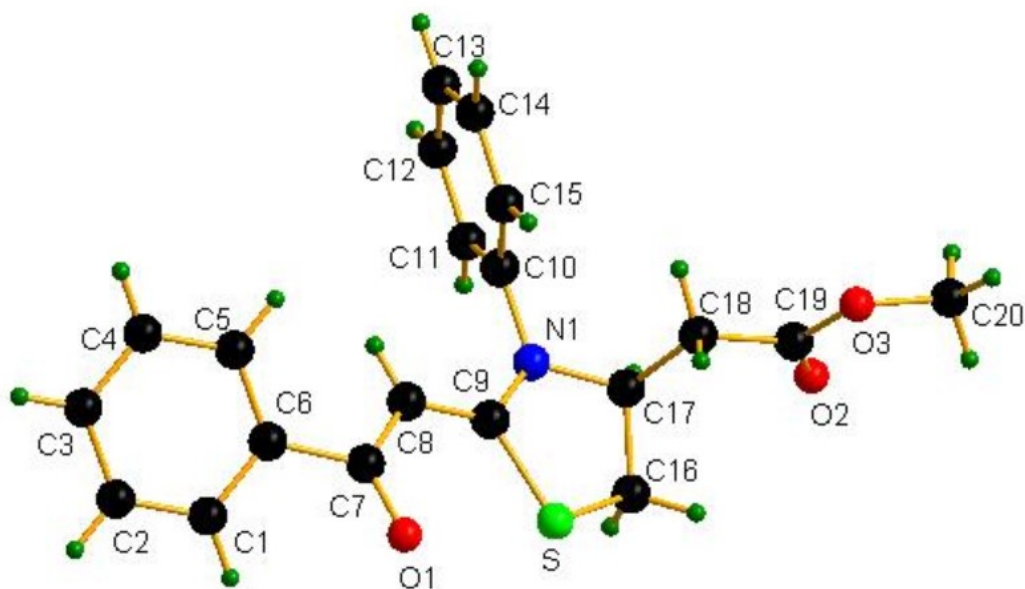

Figure S82. X-raycrystal structure of **3aa**

Single crystals of **3aa** were grown in ethyl acetate and petroleum ether. petroleum ether (2.0 mL) was added to **3aa** (20 mg in a 3 mL vial) followed by 6 drops of ethyl acetate. The 3 mL vial was capped and placed at room temperature in the experimental cabinet for 5 days, whereupon crystals formed. A yellow block shaped crystal of **3aa** was used for the X-ray crystallographic analysis. The X-ray intensity data were measured at 193(2) K, on a Rigaku AFC7R diffractometer. The crystal data of **3aa** have been deposited in CCDC with number 2019802 and have been displayed at 50% ellipsoid contour probability level.

**Table S1. Crystal data and structure refinement for 3aa.**

|                                   |                                                    |                  |
|-----------------------------------|----------------------------------------------------|------------------|
| Identification code               | <b>3aa</b>                                         |                  |
| Empirical formula                 | C <sub>20</sub> H <sub>19</sub> N O <sub>3</sub> S |                  |
| Formula weight                    | 353.42                                             |                  |
| Temperature                       | 193(2) K                                           |                  |
| Wavelength                        | 0.71073 Å                                          |                  |
| Crystal system                    | Triclinic                                          |                  |
| Space group                       | P-1                                                |                  |
| Unit cell dimensions              | a = 9.424(4) Å                                     | a = 69.255(12)°. |
|                                   | b = 9.886(4) Å                                     | b = 76.260(14)°. |
|                                   | c = 10.482(4) Å                                    | g = 89.585(14)°. |
| Volume                            | 884.0(6) Å <sup>3</sup>                            |                  |
| Z                                 | 2                                                  |                  |
| Density (calculated)              | 1.328 Mg/m <sup>3</sup>                            |                  |
| Absorption coefficient            | 0.202 mm <sup>-1</sup>                             |                  |
| F(000)                            | 372                                                |                  |
| Crystal size                      | 0.120 x 0.110 x 0.080 mm <sup>3</sup>              |                  |
| Theta range for data collection   | 2.233 to 28.311°.                                  |                  |
| Index ranges                      | -12<=h<=12, -11<=k<=13, -13<=l<=13                 |                  |
| Reflections collected             | 8429                                               |                  |
| Independent reflections           | 4233 [R(int) = 0.0264]                             |                  |
| Completeness to theta = 25.242°   | 97.7 %                                             |                  |
| Refinement method                 | Full-matrix least-squares on F <sup>2</sup>        |                  |
| Data / restraints / parameters    | 4233 / 0 / 227                                     |                  |
| Goodness-of-fit on F <sup>2</sup> | 1.031                                              |                  |
| Final R indices [I>2sigma(I)]     | R1 = 0.0540, wR2 = 0.1469                          |                  |
| R indices (all data)              | R1 = 0.0626, wR2 = 0.1548                          |                  |
| Extinction coefficient            | n/a                                                |                  |
| Largest diff. peak and hole       | 0.798 and -0.378 e. Å <sup>-3</sup>                |                  |

## X-raycrystal structure of **7aa**

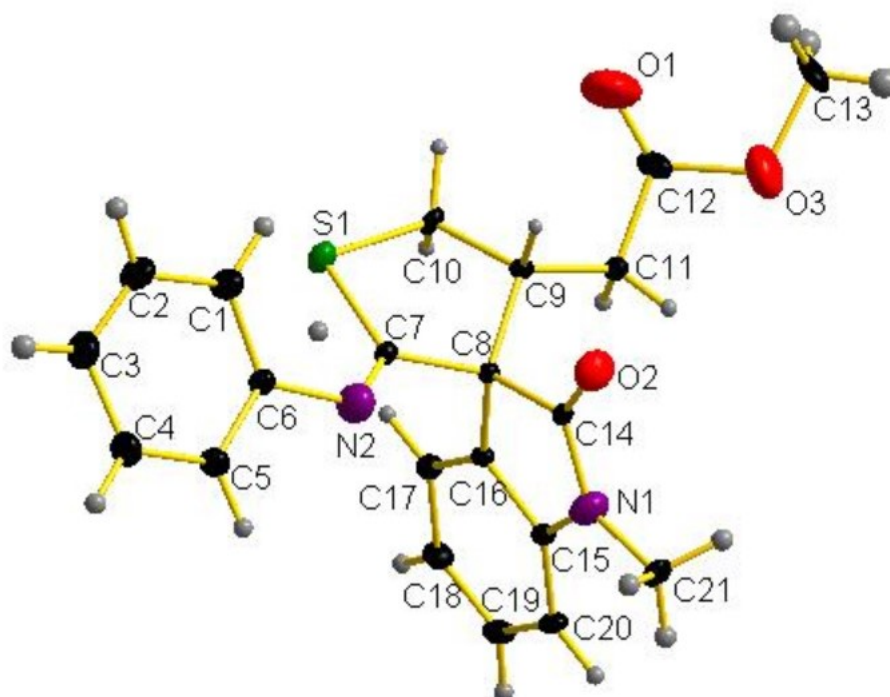

**Figure S83.** X-raycrystal structure of **7aa**

Single crystals of **7aa** were grown in ethyl acetate and petroleum ether. petroleum ether (2.0 mL) was added to **7aa** (10 mg in a 3 mL vial) followed by 6 drops of ethyl acetate. The 3 mL vial was capped and placed at room temperature in the experimental cabinet for 3 days, whereupon crystals formed. A White block shaped crystal of **7aa** was used for the X-ray crystallographic analysis. The X-ray intensity data were measured at 193(2) K, on a Rigaku AFC7R diffractometer. The crystal data of **7aa** have been deposited in CCDC with number 2019886 and have been displayed at 50% ellipsoid contour probability level.

**Table S2. Crystal data and structure refinement for 7aa.**

|                                   |                                                                 |                   |
|-----------------------------------|-----------------------------------------------------------------|-------------------|
| Identification code               | <b>7aa</b>                                                      |                   |
| Empirical formula                 | C <sub>21</sub> H <sub>20</sub> N <sub>2</sub> O <sub>3</sub> S |                   |
| Formula weight                    | 380.45                                                          |                   |
| Temperature                       | 193(2) K                                                        |                   |
| Wavelength                        | 0.71073 Å                                                       |                   |
| Crystal system                    | Monoclinic                                                      |                   |
| Space group                       | C2/c                                                            |                   |
| Unit cell dimensions              | a = 26.464(11) Å                                                | a = 90°.          |
|                                   | b = 9.374(4) Å                                                  | b = 130.263(13)°. |
|                                   | c = 19.700(10) Å                                                | g = 90°.          |
| Volume                            | 3729(3) Å <sup>3</sup>                                          |                   |
| Z                                 | 8                                                               |                   |
| Density (calculated)              | 1.355 Mg/m <sup>3</sup>                                         |                   |
| Absorption coefficient            | 0.198 mm <sup>-1</sup>                                          |                   |
| F(000)                            | 1600                                                            |                   |
| Crystal size                      | 0.120 x 0.110 x 0.080 mm <sup>3</sup>                           |                   |
| Theta range for data collection   | 2.395 to 27.826°.                                               |                   |
| Index ranges                      | -33<=h<=34, -12<=k<=12, -25<=l<=25                              |                   |
| Reflections collected             | 14077                                                           |                   |
| Independent reflections           | 4284 [R(int) = 0.0462]                                          |                   |
| Completeness to theta = 25.242°   | 97.7 %                                                          |                   |
| Refinement method                 | Full-matrix least-squares on F <sup>2</sup>                     |                   |
| Data / restraints / parameters    | 4284 / 186 / 318                                                |                   |
| Goodness-of-fit on F <sup>2</sup> | 1.032                                                           |                   |
| Final R indices [I>2sigma(I)]     | R1 = 0.0728, wR2 = 0.1944                                       |                   |
| R indices (all data)              | R1 = 0.0939, wR2 = 0.2074                                       |                   |
| Extinction coefficient            | n/a                                                             |                   |
| Largest diff. peak and hole       | 0.705 and -0.601 e. Å <sup>-3</sup>                             |                   |
